# Supplementary material for: Photoexcitation and relaxation kinetics of molecular systems in solution: towards a complete in silico model
Source: Royal Society of Chemistry journal article supplement (doi:10.1039/c6cp06167b), 2016-01-01
Supplement: c6cp06167b1.pdf [file c6cp06167b1.pdf]

SUPPLEMENTARY INFORMATION FOR THE ARTICLE:

**Photoexcitation and Relaxation kinetics of molecular systems in solution:  
towards a complete in silico model**

Massimiliano Aschi, Vincenzo Barone, Benedetta Carlotti, Isabella Daidone,  
Fausto Elisei, Andrea Amadei

**1. SCHEMATIC SUMMARY OF THE MAIN STEPS ADOPTED IN THE PRESENT  
STUDY.**

**Step 1.**

Parametrization of DASPMI in the S0 electronic state.

Parametrization of DASPMI in the ground electronic state (S0) is carried out through the scan of the S0 potential energy surface along the semiclassical coordinates  $\xi_2$  and  $\xi_3$  representing, by previous studies, the DASPMI conformational space accessible at room temperature. This step has produced the atomic charges and the  $\xi_2$ ,  $\xi_3$  dihedral energy functions to be used within the force-field termed as FF-S0 used in the Step 5.

**Step 2.**

Parametrization of DASPMI in the S1 electronic state.

Parametrization of DASPMI in the first electronic excited state (S1) is carried out through the scan of the S1 potential energy surface along the semiclassical coordinates  $\xi_2$  and  $\xi_3$  which, similarly to the S0 state, represent the DASPMI conformational space. This procedure, carried out using TD-DFT calculations with CAM-B3LYP functional and 6-31G\* has produced the atomic charges and the  $\xi_2$ ,  $\xi_3$  dihedral energy functions to be used within the force-fields termed as FF1 and FF2 (see text) utilized in the Step 8.

**Step 3.**

Evaluation of the unperturbed basis set for MD-PMM calculations in the S0 surface.

Using the S0 surface of Step 1 we evaluate (using the TD-DFT CAM-B3LYP/6-31G\* level of theory) the electronic energies of six electronic states and the corresponding electric dipole matrix.

All the terms are evaluated on a grid of 45 points and subsequently interpolated with a cubic spline providing the unperturbed matrix elements  $\epsilon_{S0-i}^0(\xi_2, \xi_3)$

$\mu_{S0-i,j}^0(\xi_2, \xi_3)$  for the energies and electric dipoles, respectively (with  $i=1,6$  and  $j=1,6$ ).

**Step 4.**

Evaluation of the unperturbed basis set for MD-PMM calculations in the S1 surface.

Using the S1 surface of Step 2 we evaluate (using the TD-DFT CAM-B3LYP/6-31G\* level of theory) the electronic energies of six vertical excited states and the corresponding electric dipole matrix.

All the terms are evaluated on a grid of 45 points and subsequently interpolated with a cubic spline providing the unperturbed matrix elements  $\epsilon_{S1-i}^0(\xi_2, \xi_3)$

$\mu_{S1-i,j}^0(\xi_2, \xi_3)$  for the energies and electric dipoles, respectively (with  $i=1,6$  and  $j=1,6$ ).

**Step 5.**

Molecular Dynamics simulation of DASPMI in the ground state, in water.

Molecular dynamics simulation of DASPMI in water at 300 K, using the FF-S0 force field, hereafter termed as *EqMD* is performed. The *EqMD* simulation produces a trajectory of DASPMI and solvent molecules. An *a posteriori* analysis of *EqMD* reveals that, according to FF-S0, DASPMI internal motion is dominated by two relevant internal coordinates basically coincident with  $\xi_2$  and  $\xi_3$  (at each *EqMD* frame DASPMI can be located at a specific point of the  $\xi_2, \xi_3$  space)

## Step 6.

### MD-PMM calculations of aqueous DASPMI absorption spectrum.

Using the *EqMD* we evaluate the absorption spectrum according to the following procedure:

#### - Step 6.1

At each *EqMD* frame DASPMI we assigned the DASPMI  $\xi_2, \xi_3$  values and the corresponding values of the unperturbed elements (Step 3) and we evaluated the electric field  $\mathbf{E}$  and potential  $\mathcal{V}$  produced by the solvent onto DASPMI center of mass.

#### - Step 6.2.

The perturbed Hamiltonian matrix of generic elements

$$H_{i,j} = \epsilon_{s0-i}^0 \delta_{i,j} - \mathbf{E} \cdot \boldsymbol{\mu}_{s0-i,j}^0 + q \mathcal{V} \delta_{i,j}$$

is constructed and diagonalized (note that  $q$  is the charge of DASPMI equal to +1).

This operation provides, at each step of *EqMD*, a set of eigenvalues,  $\epsilon_{s0-i}(\xi_2, \xi_3)$  and associated eigenvectors hereafter termed as *perturbed* eigenvalues and eigenvectors. The perturbed eigenvalues are utilized for calculating the (vertical) excitation energy of DASPMI perturbed by water ( $\Delta\epsilon_{0-i} = \epsilon_{s0-i} - \epsilon_{s0-0}$ ) and the perturbed eigenvectors are utilized for calculating the perturbed transition dipole  $\boldsymbol{\mu}_{s0-i,j}$ .

#### - Step 6.3.

Using all the frames of *EqMD*, and equation (3) reported in the text, we evaluate the DASPMI absorption spectrum for the 0-i transition.

Note that the variance in the equation (3) has been also calculated by considering three different DASPMI configurations (along the *EqMD*) showing the same  $\xi_2, \xi_3$  instantaneous values but (obviously) slightly different values of the remaining semiclassical internal coordinates. Using these structures, after a local minimization, the excitation energies have been calculated in vacuo and used for evaluating  $\sigma$ .

## Step 7.

### Extraction of excited state DASPMI initial conditions at 400 nm of pump.

For reproducing the experimental setup, using the perturbed excitation energies previously calculated ( $\Delta\epsilon_{0-i} = \epsilon_{s0-i} - \epsilon_{s0-0}$ ) at each frame of *EqMD*, we extract all the instantaneous DASPMI-solvent configuration showing an excitation wavelength of 400 nm. A total of 134 points has been extracted.

## Step 8.

### Non-equilibrium MD simulations of aqueous DASPMI in the first excited states.

Starting from each of the 134 DASPMI-solvent configurations (Step 7), and exchanging the

DASPMI force field from FF-S0 to FF2 (see text) we performed 134 MD simulations (termed in the text as *NeqMD*).

### Step 9.

#### MD-PMM applied to each of the *NeqMD* simulations.

For each of the 134 *NeqMD* we carried out the PMM procedure similarly to Step 6 but now using the unperturbed basis set evaluated on the S1 potential energy surface (Step 4) according to the steps below reported.

#### - Step 9.1

At each *NeqMD* frame DASPMI we assigned the DASPMI  $\xi_2, \xi_3$  values and the corresponding values of the unperturbed elements (Step 5) and we evaluated the electric field  $\mathbf{E}$  and potential  $\mathcal{V}$  produced by the solvent onto DASPMI center of mass.

#### - Step 9.2 (DASPMI CR kinetics).

The perturbed Hamiltonian matrix of generic elements

$$H_{i,j} = \epsilon_{S1-i}^0 \delta_{i,j} - \mathbf{E} \cdot \boldsymbol{\mu}_{S1-i,j}^0 + q \mathcal{V} \delta_{i,j}$$

is constructed and utilized for calculating the Diabatic Perturbed Energy difference ( $\Delta DPE$ , see text) in each *NeqMD*.

When  $\Delta DPE$  becomes equal to zero (the energy crossing is reached, see red lines in the Figure) the remaining portion of the same trajectory is disregarded.

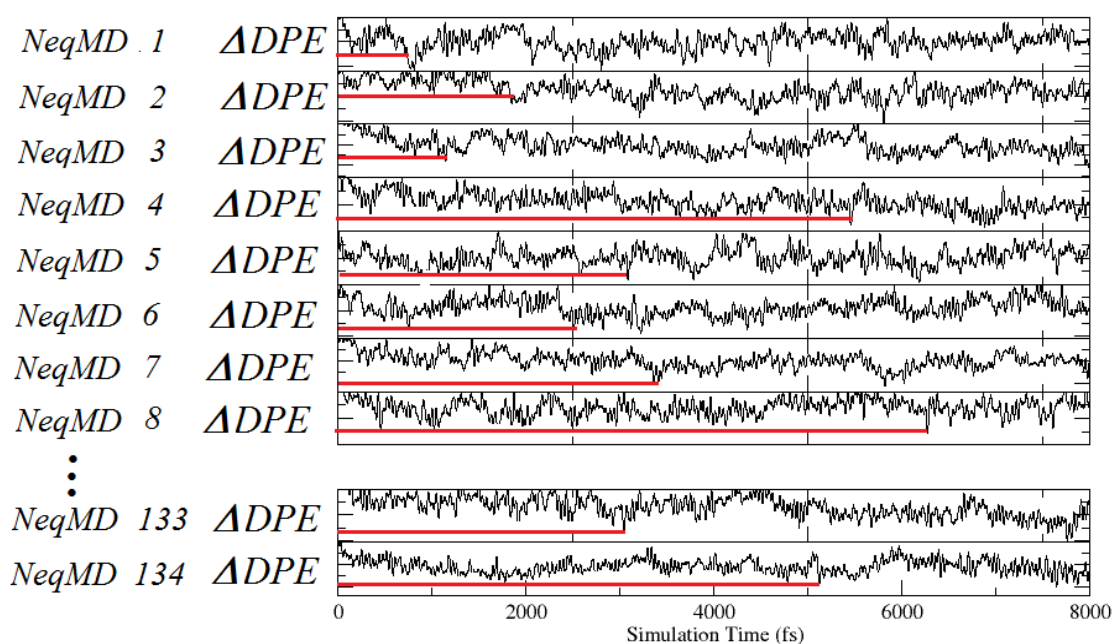

The selected crossing times are used to calculate the CR kinetics (see text).

#### - Step 9.3 (DASPMI Time Dependent Fluorescence spectra).

For each *NeqMD*, the perturbed Hamiltonian matrix of generic elements, described in the in Step 9.2, is now diagonalized at each step of *NeqMD*.

This operation provides, at each step of *NeqMD*, a set of eigenvalues and associated eigenvectors hereafter termed as *perturbed* eigenvalues and eigenvectors.

The perturbed eigenvalues are utilized for calculating the 0-1 (vertical) energy

difference of DASPMI perturbed by water ( $\Delta\epsilon_{0-1} = \epsilon_{SI-1} - \epsilon_{SI-0}$ ) and the perturbed eigenvectors are utilized for calculating the perturbed transition dipole  $\mu_{S1-i,j}$ . These values of  $\Delta\epsilon_{0-1}$  provide the instantaneous fluorescence frequency. The time sequence of  $\Delta\epsilon_{0-1}$  are reported in the Figure below.

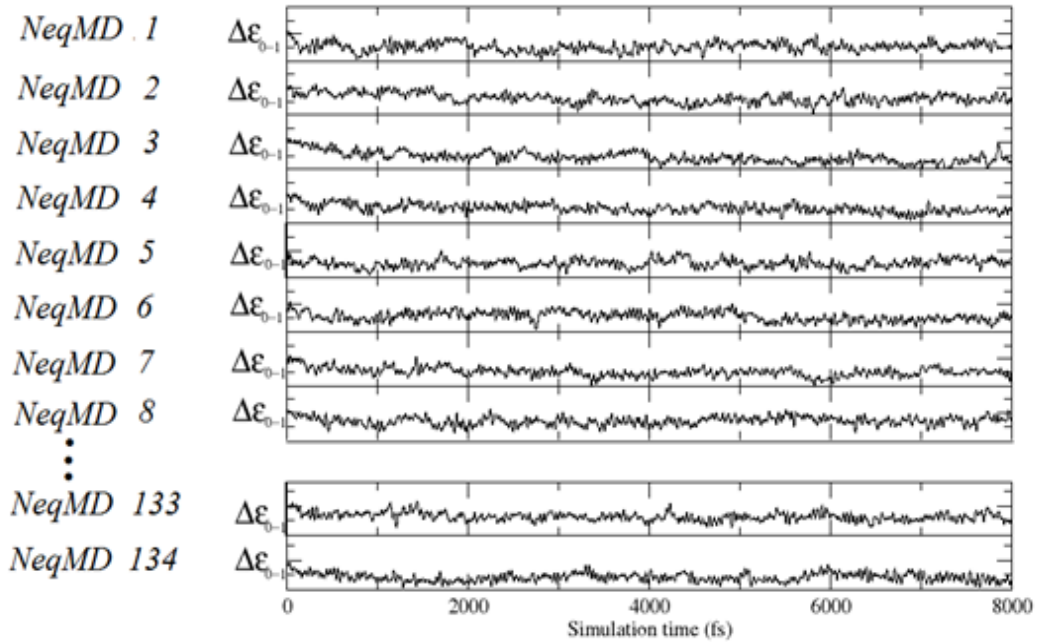

Finally we utilize the  $\Delta\epsilon_{0-1}$  values in the above Figure (disregarding the portion of the time frames of the *NeqMD* trajectories beyond the DPE crossing, see Step 9.2) for evaluating the Time Dependent fluorescence spectra using equation (4) reported in the text, and schematically reported in the Figure below. More precisely: all the values of  $\Delta\epsilon_{0-1}$  falling within a given time interval  $t_i + \Delta t$  (e.g. 0-300 fs in the red square in the figure) are concatenated and utilized for calculating the emission spectrum (equation 4). Such a spectrum is then assigned as the emission signal at the time  $t_i + \Delta t/2$  (e.g. in the case of the red square in the figure the corresponding time is equal to 150 fs).

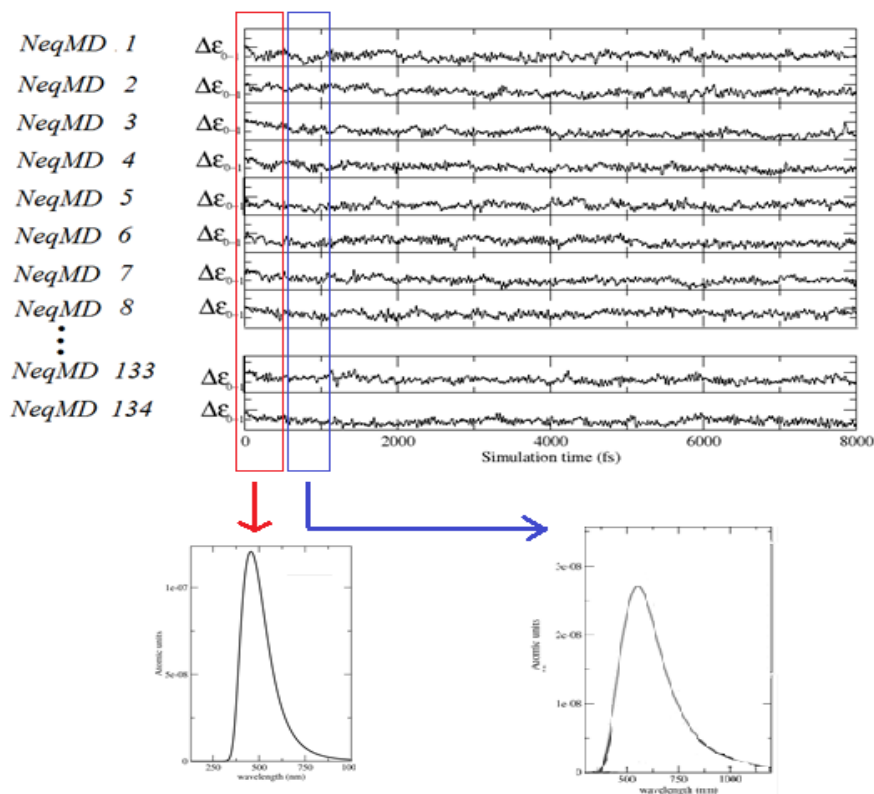

## 2. GROMACS-FORMAT TOPOLOGIES

### 2.1 DASPMI Ground state (FF-S0)

```
[ moleculetype ]
; Name nrexcl
XLMC 3
[ atoms ]
; nr type resnr resid atom cgnr charge mass total_charge
1 HC 1 XLMC H12 1 0.045000 1.0080
2 C 1 XLMC C11 1 0.063119 12.0110
3 HC 1 XLMC H10 1 0.045000 1.0080
4 HC 1 XLMC H11 1 0.045000 1.0080
5 NT 1 XLMC N1 2 -0.282468 14.0067
6 C 1 XLMC C7 2 0.361566 12.0110
7 C 1 XLMC C10 2 0.071197 12.0110
8 HC 1 XLMC H7 2 0.055000 1.0080
9 HC 1 XLMC H8 2 0.055000 1.0080
10 HC 1 XLMC H9 2 0.055000 1.0080
11 C 1 XLMC C8 3 -0.232864 12.0110
12 HC 1 XLMC H5 3 0.141586 1.0080
13 C 1 XLMC C9 3 -0.114481 12.0110
14 HC 1 XLMC H6 3 0.115604 1.0080
15 C 1 XLMC C4 4 0.155660 12.0110
16 C 1 XLMC C1 4 -0.125579 12.0110
```

|    |    |   |      |     |   |           |         |
|----|----|---|------|-----|---|-----------|---------|
| 17 | HC | 1 | XLMC | H1  | 4 | 0.150428  | 1.0080  |
| 18 | C  | 1 | XLMC | C2  | 4 | -0.295712 | 12.0110 |
| 19 | HC | 1 | XLMC | H2  | 4 | 0.146281  | 1.0080  |
| 20 | C  | 1 | XLMC | C3  | 5 | 0.311103  | 12.0110 |
| 21 | NT | 1 | XLMC | N2  | 5 | 0.017762  | 14.0067 |
| 22 | C  | 1 | XLMC | C   | 5 | -0.040315 | 12.011  |
| 23 | C  | 1 | XLMC | C12 | 5 | -0.053162 | 12.0110 |
| 24 | HC | 1 | XLMC | H14 | 5 | 0.154506  | 1.0080  |
| 25 | C  | 1 | XLMC | C15 | 6 | -0.249371 | 12.0110 |
| 26 | HC | 1 | XLMC | H17 | 6 | 0.153899  | 1.0080  |
| 27 | C  | 1 | XLMC | C14 | 7 | 0.059080  | 12.0110 |
| 28 | HC | 1 | XLMC | H16 | 7 | 0.116388  | 1.0080  |
| 29 | C  | 1 | XLMC | C13 | 7 | -0.113642 | 12.0110 |
| 30 | HC | 1 | XLMC | H15 | 7 | 0.133453  | 1.0080  |
| 31 | C  | 1 | XLMC | C6  | 8 | -0.210490 | 12.0110 |
| 32 | HC | 1 | XLMC | H4  | 8 | 0.145778  | 1.0080  |
| 33 | C  | 1 | XLMC | C5  | 8 | -0.163654 | 12.0110 |
| 34 | HC | 1 | XLMC | H3  | 8 | 0.113328  | 1.0080  |
| 35 | HC | 1 | XLMC | H3  | 8 | 0.057000  | 1.0080  |
| 36 | HC | 1 | XLMC | H3  | 8 | 0.057000  | 1.0080  |
| 37 | HC | 1 | XLMC | H3  | 8 | 0.057000  | 1.0080  |

[ bonds ]

| ; ai | aj | funct | c0     | c1         |
|------|----|-------|--------|------------|
| 1    | 2  | 2     | 0.1090 | 1.2300e+07 |
| 2    | 3  | 2     | 0.1090 | 1.2300e+07 |
| 2    | 4  | 2     | 0.1090 | 1.2300e+07 |
| 2    | 5  | 2     | 0.1480 | 5.7300e+06 |
| 5    | 6  | 2     | 0.1450 | 5.2319e+06 |
| 5    | 7  | 2     | 0.1480 | 5.7300e+06 |
| 6    | 11 | 2     | 0.1390 | 8.6600e+06 |
| 6    | 31 | 2     | 0.1390 | 8.6600e+06 |
| 7    | 8  | 2     | 0.1090 | 1.2300e+07 |
| 7    | 9  | 2     | 0.1090 | 1.2300e+07 |
| 7    | 10 | 2     | 0.1090 | 1.2300e+07 |
| 11   | 12 | 2     | 0.1080 | 1.5003e+07 |
| 11   | 13 | 2     | 0.1390 | 8.6600e+06 |
| 13   | 14 | 2     | 0.1090 | 1.2300e+07 |
| 13   | 15 | 2     | 0.1390 | 8.6600e+06 |
| 15   | 16 | 2     | 0.1480 | 5.7300e+06 |
| 15   | 33 | 2     | 0.1390 | 8.6600e+06 |
| 16   | 17 | 2     | 0.1090 | 1.2300e+07 |
| 16   | 18 | 2     | 0.1330 | 1.1800e+07 |
| 18   | 19 | 2     | 0.1080 | 1.5003e+07 |
| 18   | 20 | 2     | 0.1480 | 5.7300e+06 |
| 20   | 21 | 2     | 0.1360 | 1.0200e+07 |
| 20   | 25 | 2     | 0.1400 | 8.5400e+06 |
| 22   | 21 | 2     | 0.1480 | 5.7300e+06 |
| 21   | 23 | 2     | 0.1380 | 1.1000e+07 |
| 23   | 24 | 2     | 0.1090 | 1.2300e+07 |
| 23   | 29 | 2     | 0.1360 | 1.0200e+07 |
| 25   | 26 | 2     | 0.1090 | 1.2300e+07 |

|    |    |   |        |            |
|----|----|---|--------|------------|
| 25 | 27 | 2 | 0.1380 | 1.1000e+07 |
| 27 | 28 | 2 | 0.1090 | 1.2300e+07 |
| 27 | 29 | 2 | 0.1410 | 6.5389e+06 |
| 29 | 30 | 2 | 0.1090 | 1.2300e+07 |
| 31 | 32 | 2 | 0.1080 | 1.5003e+07 |
| 31 | 33 | 2 | 0.1390 | 8.6600e+06 |
| 33 | 34 | 2 | 0.1090 | 1.2300e+07 |
| 35 | 22 | 2 | 0.1090 | 1.2300e+07 |
| 36 | 22 | 2 | 0.1090 | 1.2300e+07 |
| 37 | 22 | 2 | 0.1090 | 1.2300e+07 |

[ pairs ]

; ai aj funct ; all 1-4 pairs but the ones excluded in GROMOS itp

|    |    |   |
|----|----|---|
| 1  | 6  | 1 |
| 1  | 7  | 1 |
| 2  | 8  | 1 |
| 2  | 9  | 1 |
| 2  | 10 | 1 |
| 2  | 11 | 1 |
| 2  | 31 | 1 |
| 3  | 6  | 1 |
| 3  | 7  | 1 |
| 4  | 6  | 1 |
| 4  | 7  | 1 |
| 5  | 12 | 1 |
| 5  | 13 | 1 |
| 5  | 32 | 1 |
| 5  | 33 | 1 |
| 6  | 8  | 1 |
| 6  | 9  | 1 |
| 6  | 10 | 1 |
| 6  | 14 | 1 |
| 6  | 34 | 1 |
| 7  | 11 | 1 |
| 7  | 31 | 1 |
| 11 | 16 | 1 |
| 11 | 32 | 1 |
| 12 | 14 | 1 |
| 12 | 15 | 1 |
| 12 | 31 | 1 |
| 13 | 17 | 1 |
| 13 | 18 | 1 |
| 13 | 34 | 1 |
| 14 | 16 | 1 |
| 14 | 33 | 1 |
| 15 | 19 | 1 |
| 15 | 32 | 1 |
| 16 | 21 | 1 |
| 16 | 25 | 1 |
| 16 | 31 | 1 |
| 16 | 34 | 1 |
| 17 | 19 | 1 |

17 20 1  
17 33 1  
18 22 1  
18 26 1  
18 27 1  
18 33 1  
19 21 1  
19 25 1  
20 24 1  
20 28 1  
21 26 1  
21 30 1  
22 24 1  
22 25 1  
22 29 1  
23 28 1  
24 27 1  
24 30 1  
25 30 1  
26 28 1  
26 29 1  
28 30 1  
32 34 1  
35 23 1  
35 20 1  
36 23 1  
36 20 1  
37 23 1  
37 20 1

[ angles ]

```
; ai aj ak funct angle fc  
1 2 3 2 108.53 443.00  
1 2 4 2 108.53 443.00  
1 2 5 2 108.53 443.00  
3 2 4 2 108.53 443.00  
3 2 5 2 108.53 443.00  
4 2 5 2 108.53 443.00  
2 5 6 2 116.00 620.00  
2 5 7 2 111.00 530.00  
6 5 7 2 116.00 620.00  
5 6 11 2 120.00 560.00  
5 6 31 2 120.00 560.00  
11 6 31 2 120.00 560.00  
5 7 8 2 108.53 443.00  
5 7 9 2 108.53 443.00  
5 7 10 2 108.53 443.00  
8 7 9 2 108.53 443.00  
8 7 10 2 108.53 443.00  
9 7 10 2 108.53 443.00  
6 11 12 2 120.00 505.00
```



|    |    |    |   |        |         |
|----|----|----|---|--------|---------|
| 6  | 11 | 13 | 2 | 120.00 | 560.00  |
| 12 | 11 | 13 | 2 | 120.00 | 505.00  |
| 11 | 13 | 14 | 2 | 120.00 | 505.00  |
| 11 | 13 | 15 | 2 | 120.00 | 560.00  |
| 14 | 13 | 15 | 2 | 120.00 | 505.00  |
| 13 | 15 | 16 | 2 | 120.00 | 560.00  |
| 13 | 15 | 33 | 2 | 120.00 | 560.00  |
| 16 | 15 | 33 | 2 | 120.00 | 560.00  |
| 15 | 16 | 17 | 2 | 114.00 | 1559.41 |
| 15 | 16 | 18 | 2 | 126.00 | 640.00  |
| 17 | 16 | 18 | 2 | 120.00 | 505.00  |
| 16 | 18 | 19 | 2 | 120.00 | 505.00  |
| 16 | 18 | 20 | 2 | 126.00 | 640.00  |
| 19 | 18 | 20 | 2 | 113.00 | 1559.41 |
| 18 | 20 | 21 | 2 | 120.00 | 560.00  |
| 18 | 20 | 25 | 2 | 120.00 | 560.00  |
| 21 | 20 | 25 | 2 | 115.00 | 610.00  |
| 20 | 21 | 22 | 2 | 120.00 | 390.00  |
| 20 | 21 | 23 | 2 | 124.00 | 730.00  |
| 22 | 21 | 23 | 2 | 116.00 | 465.00  |
| 21 | 23 | 24 | 2 | 120.00 | 505.00  |
| 21 | 23 | 29 | 2 | 120.00 | 560.00  |
| 24 | 23 | 29 | 2 | 126.00 | 575.00  |
| 20 | 25 | 26 | 2 | 120.00 | 505.00  |
| 20 | 25 | 27 | 2 | 120.00 | 560.00  |
| 26 | 25 | 27 | 2 | 120.00 | 505.00  |
| 25 | 27 | 28 | 2 | 120.00 | 505.00  |
| 25 | 27 | 29 | 2 | 120.00 | 560.00  |
| 28 | 27 | 29 | 2 | 120.00 | 505.00  |
| 23 | 29 | 27 | 2 | 120.00 | 560.00  |
| 23 | 29 | 30 | 2 | 120.00 | 505.00  |
| 27 | 29 | 30 | 2 | 120.00 | 505.00  |
| 6  | 31 | 32 | 2 | 120.00 | 505.00  |
| 6  | 31 | 33 | 2 | 120.00 | 560.00  |
| 32 | 31 | 33 | 2 | 120.00 | 505.00  |
| 15 | 33 | 31 | 2 | 120.00 | 560.00  |
| 15 | 33 | 34 | 2 | 120.00 | 505.00  |
| 31 | 33 | 34 | 2 | 120.00 | 505.00  |
| 35 | 22 | 21 | 2 | 108.53 | 443.00  |
| 36 | 22 | 21 | 2 | 108.53 | 443.00  |
| 37 | 22 | 21 | 2 | 108.53 | 443.00  |
| 35 | 22 | 36 | 2 | 108.53 | 443.00  |
| 35 | 22 | 37 | 2 | 108.53 | 443.00  |
| 36 | 22 | 37 | 2 | 108.53 | 443.00  |

[ dihedrals ]

; GROMOS improper dihedrals

; ai aj ak al funct angle fc

|    |    |    |    |   |      |        |
|----|----|----|----|---|------|--------|
| 16 | 18 | 17 | 15 | 2 | 0.00 | 167.36 |
| 18 | 16 | 20 | 19 | 2 | 0.00 | 167.36 |
| 20 | 18 | 21 | 25 | 2 | 0.00 | 900.36 |
| 15 | 16 | 33 | 13 | 2 | 0.00 | 900.36 |

|    |    |    |    |   |      |        |
|----|----|----|----|---|------|--------|
| 33 | 15 | 31 | 34 | 2 | 0.00 | 167.36 |
| 31 | 33 | 6  | 32 | 2 | 0.00 | 167.36 |
| 6  | 31 | 11 | 5  | 2 | 0.00 | 900.36 |
| 11 | 6  | 13 | 12 | 2 | 0.00 | 167.36 |
| 13 | 15 | 11 | 14 | 2 | 0.00 | 167.36 |
| 21 | 20 | 23 | 22 | 2 | 0.00 | 167.36 |
| 23 | 21 | 29 | 24 | 2 | 0.00 | 167.36 |
| 29 | 23 | 27 | 30 | 2 | 0.00 | 167.36 |
| 27 | 29 | 25 | 28 | 2 | 0.00 | 167.36 |
| 25 | 20 | 27 | 26 | 2 | 0.00 | 167.36 |
| 7  | 5  | 6  | 11 | 2 | 0.0  | 900.0  |

[ dihedrals ]

| ; ai | aj | ak | al | funct | ph0    | cp    | mult |
|------|----|----|----|-------|--------|-------|------|
| 3    | 2  | 5  | 6  | 1     | 180.00 | 1.00  | 6    |
| 7    | 5  | 6  | 31 | 1     | 180.00 | 33.50 | 2    |
| 6    | 5  | 7  | 8  | 1     | 180.00 | 1.00  | 6    |
| 31   | 6  | 11 | 13 | 1     | 180.00 | 41.80 | 2    |
| 11   | 6  | 31 | 33 | 1     | 180.00 | 41.80 | 2    |
| 6    | 11 | 13 | 15 | 1     | 180.00 | 41.80 | 2    |
| 11   | 13 | 15 | 33 | 1     | 180.00 | 41.80 | 2    |
| 33   | 15 | 16 | 18 | 1     | 180.00 | 30.00 | 2    |
| 13   | 15 | 33 | 31 | 1     | 180.00 | 41.80 | 2    |
| 15   | 16 | 18 | 20 | 1     | 180.00 | 41.80 | 2    |
| 16   | 18 | 20 | 21 | 1     | 180.00 | 30.00 | 2    |
| 25   | 20 | 21 | 23 | 1     | 180.00 | 41.80 | 2    |
| 21   | 20 | 25 | 27 | 1     | 180.00 | 41.80 | 2    |
| 20   | 21 | 23 | 29 | 1     | 180.00 | 41.80 | 2    |
| 21   | 23 | 29 | 27 | 1     | 180.00 | 41.80 | 2    |
| 20   | 25 | 27 | 29 | 1     | 180.00 | 41.80 | 2    |
| 25   | 27 | 29 | 23 | 1     | 180.00 | 41.80 | 2    |
| 6    | 31 | 33 | 15 | 1     | 180.00 | 41.80 | 2    |
| 35   | 22 | 21 | 23 | 1     | 180.00 | 1.00  | 6    |

[ exclusions ]

| ; ai | aj | funct | ; GROMOS 1-4 exclusions |
|------|----|-------|-------------------------|
| 6    | 15 |       |                         |
| 11   | 33 |       |                         |
| 13   | 31 |       |                         |
| 15   | 20 |       |                         |
| 20   | 29 |       |                         |
| 21   | 27 |       |                         |
| 23   | 25 |       |                         |

2.2 DASPMI L.E. CONDITION (FF1)

[ moleculetype ]

; Name nrexcl

XLMC 3

[ atoms ]

| ; nr | type | resnr | resid | atom | cgmr | charge   | mass   | total_charge |
|------|------|-------|-------|------|------|----------|--------|--------------|
| 1    | HC   | 1     | XLMC  | H12  | 1    | 0.084733 | 1.0080 |              |

|    |    |   |      |     |   |           |         |
|----|----|---|------|-----|---|-----------|---------|
| 2  | C  | 1 | XLMC | C11 | 1 | 0.028575  | 12.0110 |
| 3  | HC | 1 | XLMC | H10 | 1 | 0.037931  | 1.0080  |
| 4  | HC | 1 | XLMC | H11 | 1 | 0.037867  | 1.0080  |
| 5  | NT | 1 | XLMC | N1  | 2 | -0.215134 | 14.0067 |
| 6  | C  | 1 | XLMC | C7  | 2 | 0.317788  | 12.0110 |
| 7  | C  | 1 | XLMC | C10 | 2 | 0.049606  | 12.0110 |
| 8  | HC | 1 | XLMC | H7  | 2 | 0.078219  | 1.0080  |
| 9  | HC | 1 | XLMC | H8  | 2 | 0.033372  | 1.0080  |
| 10 | HC | 1 | XLMC | H9  | 2 | 0.033395  | 1.0080  |
| 11 | C  | 1 | XLMC | C8  | 3 | -0.207289 | 12.0110 |
| 12 | HC | 1 | XLMC | H5  | 3 | 0.153980  | 1.0080  |
| 13 | C  | 1 | XLMC | C9  | 3 | -0.191872 | 12.0110 |
| 14 | HC | 1 | XLMC | H6  | 3 | 0.121595  | 1.0080  |
| 15 | C  | 1 | XLMC | C4  | 4 | 0.324886  | 12.0110 |
| 16 | C  | 1 | XLMC | C1  | 4 | -0.244732 | 12.0110 |
| 17 | HC | 1 | XLMC | H1  | 4 | 0.139763  | 1.0080  |
| 18 | C  | 1 | XLMC | C2  | 4 | -0.227940 | 12.0110 |
| 19 | HC | 1 | XLMC | H2  | 4 | 0.165308  | 1.0080  |
| 20 | C  | 1 | XLMC | C3  | 5 | 0.265962  | 12.0110 |
| 21 | NT | 1 | XLMC | N2  | 5 | -0.028406 | 14.0067 |
| 22 | C  | 1 | XLMC | H13 | 5 | -0.078949 | 12.0080 |
| 23 | C  | 1 | XLMC | C12 | 5 | -0.020526 | 12.0110 |
| 24 | HC | 1 | XLMC | H14 | 5 | 0.142782  | 1.0080  |
| 25 | C  | 1 | XLMC | C15 | 6 | -0.206560 | 12.0110 |
| 26 | HC | 1 | XLMC | H17 | 6 | 0.147201  | 1.0080  |
| 27 | C  | 1 | XLMC | C14 | 7 | 0.018385  | 12.0110 |
| 28 | HC | 1 | XLMC | H16 | 7 | 0.108745  | 1.0080  |
| 29 | C  | 1 | XLMC | C13 | 7 | -0.136992 | 12.0110 |
| 30 | HC | 1 | XLMC | H15 | 7 | 0.133105  | 1.0080  |
| 31 | C  | 1 | XLMC | C6  | 8 | -0.156072 | 12.0110 |
| 32 | HC | 1 | XLMC | H4  | 8 | 0.151127  | 1.0080  |
| 33 | C  | 1 | XLMC | C5  | 8 | -0.245247 | 12.0110 |
| 34 | HC | 1 | XLMC | H3  | 8 | 0.146669  | 1.0080  |
| 35 | HC | 1 | XLMC | H3  | 8 | 0.109994  | 1.0080  |
| 36 | HC | 1 | XLMC | H3  | 8 | 0.064385  | 1.0080  |
| 37 | HC | 1 | XLMC | H3  | 8 | 0.064350  | 1.0080  |

[ bonds ]

| ; ai | aj | funct | c0     | c1         |
|------|----|-------|--------|------------|
| 1    | 2  | 2     | 0.1090 | 1.2300e+07 |
| 2    | 3  | 2     | 0.1090 | 1.2300e+07 |
| 2    | 4  | 2     | 0.1090 | 1.2300e+07 |
| 2    | 5  | 2     | 0.1480 | 5.7300e+06 |
| 5    | 6  | 2     | 0.1450 | 5.2319e+06 |
| 5    | 7  | 2     | 0.1480 | 5.7300e+06 |
| 6    | 11 | 2     | 0.1390 | 8.6600e+06 |
| 6    | 31 | 2     | 0.1390 | 8.6600e+06 |
| 7    | 8  | 2     | 0.1090 | 1.2300e+07 |
| 7    | 9  | 2     | 0.1090 | 1.2300e+07 |
| 7    | 10 | 2     | 0.1090 | 1.2300e+07 |
| 11   | 12 | 2     | 0.1080 | 1.5003e+07 |
| 11   | 13 | 2     | 0.1390 | 8.6600e+06 |

|    |    |   |        |            |
|----|----|---|--------|------------|
| 13 | 14 | 2 | 0.1090 | 1.2300e+07 |
| 13 | 15 | 2 | 0.1390 | 8.6600e+06 |
| 15 | 16 | 2 | 0.1480 | 5.7300e+06 |
| 15 | 33 | 2 | 0.1390 | 8.6600e+06 |
| 16 | 17 | 2 | 0.1090 | 1.2300e+07 |
| 16 | 18 | 2 | 0.1330 | 1.1800e+07 |
| 18 | 19 | 2 | 0.1080 | 1.5003e+07 |
| 18 | 20 | 2 | 0.1480 | 5.7300e+06 |
| 20 | 21 | 2 | 0.1360 | 1.0200e+07 |
| 20 | 25 | 2 | 0.1400 | 8.5400e+06 |
| 22 | 21 | 2 | 0.1480 | 5.7300e+06 |
| 21 | 23 | 2 | 0.1380 | 1.1000e+07 |
| 23 | 24 | 2 | 0.1090 | 1.2300e+07 |
| 23 | 29 | 2 | 0.1360 | 1.0200e+07 |
| 25 | 26 | 2 | 0.1090 | 1.2300e+07 |
| 25 | 27 | 2 | 0.1380 | 1.1000e+07 |
| 27 | 28 | 2 | 0.1090 | 1.2300e+07 |
| 27 | 29 | 2 | 0.1410 | 6.5389e+06 |
| 29 | 30 | 2 | 0.1090 | 1.2300e+07 |
| 31 | 32 | 2 | 0.1080 | 1.5003e+07 |
| 31 | 33 | 2 | 0.1390 | 8.6600e+06 |
| 33 | 34 | 2 | 0.1090 | 1.2300e+07 |
| 35 | 22 | 2 | 0.1090 | 1.2300e+07 |
| 36 | 22 | 2 | 0.1090 | 1.2300e+07 |
| 37 | 22 | 2 | 0.1090 | 1.2300e+07 |

[ pairs ]

; ai aj funct ; all 1-4 pairs but the ones excluded in GROMOS itp

|    |    |   |
|----|----|---|
| 1  | 6  | 1 |
| 1  | 7  | 1 |
| 2  | 8  | 1 |
| 2  | 9  | 1 |
| 2  | 10 | 1 |
| 2  | 11 | 1 |
| 2  | 31 | 1 |
| 3  | 6  | 1 |
| 3  | 7  | 1 |
| 4  | 6  | 1 |
| 4  | 7  | 1 |
| 5  | 12 | 1 |
| 5  | 13 | 1 |
| 5  | 32 | 1 |
| 5  | 33 | 1 |
| 6  | 8  | 1 |
| 6  | 9  | 1 |
| 6  | 10 | 1 |
| 6  | 14 | 1 |
| 6  | 34 | 1 |
| 7  | 11 | 1 |
| 7  | 31 | 1 |
| 11 | 16 | 1 |

11 32 1  
12 14 1  
12 15 1  
12 31 1  
13 17 1  
13 18 1  
13 34 1  
14 16 1  
14 33 1  
15 19 1  
15 32 1  
16 21 1  
16 25 1  
16 31 1  
16 34 1  
17 19 1  
17 20 1  
17 33 1  
18 22 1  
18 23 1  
18 26 1  
18 27 1  
18 33 1  
19 21 1  
19 25 1  
20 24 1  
20 28 1  
21 26 1  
21 30 1  
22 24 1  
22 25 1  
22 29 1  
23 28 1  
24 27 1  
24 30 1  
25 30 1  
26 28 1  
26 29 1  
28 30 1  
32 34 1  
35 23 1  
35 20 1  
36 23 1  
36 20 1  
37 23 1  
37 20 1

[ angles ]

```
; ai aj ak funct angle fc  
  1  2  3  2  108.53 443.00  
  1  2  4  2  108.53 443.00
```

|    |    |    |   |        |         |
|----|----|----|---|--------|---------|
| 1  | 2  | 5  | 2 | 108.53 | 443.00  |
| 3  | 2  | 4  | 2 | 108.53 | 443.00  |
| 3  | 2  | 5  | 2 | 108.53 | 443.00  |
| 4  | 2  | 5  | 2 | 108.53 | 443.00  |
| 2  | 5  | 6  | 2 | 116.00 | 620.00  |
| 2  | 5  | 7  | 2 | 111.00 | 530.00  |
| 6  | 5  | 7  | 2 | 116.00 | 620.00  |
| 5  | 6  | 11 | 2 | 120.00 | 560.00  |
| 5  | 6  | 31 | 2 | 120.00 | 560.00  |
| 11 | 6  | 31 | 2 | 120.00 | 560.00  |
| 5  | 7  | 8  | 2 | 108.53 | 443.00  |
| 5  | 7  | 9  | 2 | 108.53 | 443.00  |
| 5  | 7  | 10 | 2 | 108.53 | 443.00  |
| 8  | 7  | 9  | 2 | 108.53 | 443.00  |
| 8  | 7  | 10 | 2 | 108.53 | 443.00  |
| 9  | 7  | 10 | 2 | 108.53 | 443.00  |
| 6  | 11 | 12 | 2 | 120.00 | 505.00  |
| 6  | 11 | 13 | 2 | 120.00 | 560.00  |
| 12 | 11 | 13 | 2 | 120.00 | 505.00  |
| 11 | 13 | 14 | 2 | 120.00 | 505.00  |
| 11 | 13 | 15 | 2 | 120.00 | 560.00  |
| 14 | 13 | 15 | 2 | 120.00 | 505.00  |
| 13 | 15 | 16 | 2 | 120.00 | 560.00  |
| 13 | 15 | 33 | 2 | 120.00 | 560.00  |
| 16 | 15 | 33 | 2 | 120.00 | 560.00  |
| 15 | 16 | 17 | 2 | 114.00 | 1559.41 |
| 15 | 16 | 18 | 2 | 126.00 | 640.00  |
| 17 | 16 | 18 | 2 | 120.00 | 505.00  |
| 16 | 18 | 19 | 2 | 117.00 | 505.00  |
| 16 | 18 | 20 | 2 | 134.00 | 640.00  |
| 19 | 18 | 20 | 2 | 109.00 | 1559.41 |
| 18 | 20 | 21 | 2 | 123.00 | 560.00  |
| 18 | 20 | 25 | 2 | 117.00 | 560.00  |
| 21 | 20 | 25 | 2 | 120.00 | 610.00  |
| 20 | 21 | 22 | 2 | 124.00 | 390.00  |
| 20 | 21 | 23 | 2 | 120.00 | 730.00  |
| 22 | 21 | 23 | 2 | 116.00 | 465.00  |
| 21 | 23 | 24 | 2 | 120.00 | 505.00  |
| 21 | 23 | 29 | 2 | 120.00 | 560.00  |
| 24 | 23 | 29 | 2 | 126.00 | 575.00  |
| 20 | 25 | 26 | 2 | 120.00 | 505.00  |
| 20 | 25 | 27 | 2 | 120.00 | 560.00  |
| 26 | 25 | 27 | 2 | 120.00 | 505.00  |
| 25 | 27 | 28 | 2 | 120.00 | 505.00  |
| 25 | 27 | 29 | 2 | 120.00 | 560.00  |
| 28 | 27 | 29 | 2 | 120.00 | 505.00  |
| 23 | 29 | 27 | 2 | 120.00 | 560.00  |
| 23 | 29 | 30 | 2 | 120.00 | 505.00  |
| 27 | 29 | 30 | 2 | 120.00 | 505.00  |
| 6  | 31 | 32 | 2 | 120.00 | 505.00  |
| 6  | 31 | 33 | 2 | 120.00 | 560.00  |
| 32 | 31 | 33 | 2 | 120.00 | 505.00  |

|    |    |    |   |        |        |
|----|----|----|---|--------|--------|
| 15 | 33 | 31 | 2 | 120.00 | 560.00 |
| 15 | 33 | 34 | 2 | 120.00 | 505.00 |
| 31 | 33 | 34 | 2 | 120.00 | 505.00 |
| 35 | 22 | 21 | 2 | 108.53 | 443.00 |
| 36 | 22 | 21 | 2 | 108.53 | 443.00 |
| 37 | 22 | 21 | 2 | 108.53 | 443.00 |
| 35 | 22 | 36 | 2 | 108.53 | 443.00 |
| 35 | 22 | 37 | 2 | 108.53 | 443.00 |
| 36 | 22 | 37 | 2 | 108.53 | 443.00 |

[ dihedrals ]

; GROMOS improper dihedrals

| ; ai | aj | ak | al | funct | angle | fc     |
|------|----|----|----|-------|-------|--------|
| 16   | 18 | 17 | 15 | 2     | 0.00  | 167.36 |
| 18   | 16 | 20 | 19 | 2     | 0.00  | 167.36 |
| 20   | 18 | 21 | 25 | 2     | 0.00  | 900.36 |
| 15   | 16 | 33 | 13 | 2     | 0.00  | 900.36 |
| 33   | 15 | 31 | 34 | 2     | 0.00  | 167.36 |
| 31   | 33 | 6  | 32 | 2     | 0.00  | 167.36 |
| 6    | 31 | 11 | 5  | 2     | 0.00  | 900.36 |
| 11   | 6  | 13 | 12 | 2     | 0.00  | 167.36 |
| 13   | 15 | 11 | 14 | 2     | 0.00  | 167.36 |
| 21   | 20 | 23 | 22 | 2     | 0.00  | 167.36 |
| 23   | 21 | 29 | 24 | 2     | 0.00  | 167.36 |
| 29   | 23 | 27 | 30 | 2     | 0.00  | 167.36 |
| 27   | 29 | 25 | 28 | 2     | 0.00  | 167.36 |
| 25   | 20 | 27 | 26 | 2     | 0.00  | 167.36 |
| 7    | 5  | 6  | 11 | 2     | 0.0   | 900.0  |

[ dihedrals ]

| ; ai | aj | ak | al | funct | ph0    | cp    | mult |
|------|----|----|----|-------|--------|-------|------|
| 3    | 2  | 5  | 6  | 1     | 180.00 | 1.00  | 6    |
| 7    | 5  | 6  | 31 | 1     | 180.00 | 33.50 | 2    |
| 6    | 5  | 7  | 8  | 1     | 180.00 | 1.00  | 6    |
| 31   | 6  | 11 | 13 | 1     | 180.00 | 41.80 | 2    |
| 11   | 6  | 31 | 33 | 1     | 180.00 | 41.80 | 2    |
| 6    | 11 | 13 | 15 | 1     | 180.00 | 41.80 | 2    |
| 11   | 13 | 15 | 33 | 1     | 180.00 | 41.80 | 2    |
| ; 33 | 15 | 16 | 18 | 1     | 180.00 | 32.20 | 2    |
| 33   | 15 | 16 | 18 | 1     | 180.0  | 7.0   | 2    |
| 13   | 15 | 33 | 31 | 1     | 180.00 | 41.80 | 2    |
| 15   | 16 | 18 | 20 | 1     | 180.00 | 41.80 | 2    |
| ; 16 | 18 | 20 | 21 | 1     | 180.00 | 32.00 | 2    |
| 16   | 18 | 20 | 21 | 1     | 180.0  | 6.5   | 2    |
| 25   | 20 | 21 | 23 | 1     | 180.00 | 41.80 | 2    |
| 21   | 20 | 25 | 27 | 1     | 180.00 | 41.80 | 2    |
| 20   | 21 | 23 | 29 | 1     | 180.00 | 41.80 | 2    |
| 21   | 23 | 29 | 27 | 1     | 180.00 | 41.80 | 2    |
| 20   | 25 | 27 | 29 | 1     | 180.00 | 41.80 | 2    |
| 25   | 27 | 29 | 23 | 1     | 180.00 | 41.80 | 2    |
| 6    | 31 | 33 | 15 | 1     | 180.00 | 41.80 | 2    |
| 35   | 22 | 21 | 23 | 1     | 180.00 | 1.00  | 6    |

```
[ exclusions ]
; ai aj funct ; GROMOS 1-4 exclusions
 6 15
11 33
13 31
15 20
20 29
21 27
23 25
```

### 2.3 DASPMI CT1 CONDITION (FF2)

```
;Name nrexcl
XLMC 3
[ atoms ]
; nr type resnr resid atom cgnr charge mass total_charge
 1 HC 1 XLMC H12 1 0.097076 1.0080
 2 C 1 XLMC C11 1 0.000889 12.0110
 3 HC 1 XLMC H10 1 0.065322 1.0080
 4 HC 1 XLMC H11 1 0.062973 1.0080
 5 NT 1 XLMC N1 2 -0.173243 14.0067
 6 C 1 XLMC C7 2 0.352118 12.0110
 7 C 1 XLMC C10 2 -0.022222 12.0110
 8 HC 1 XLMC H7 2 0.105586 1.0080
 9 HC 1 XLMC H8 2 0.068768 1.0080
10 HC 1 XLMC H9 2 0.068551 1.0080
11 C 1 XLMC C8 3 -0.167298 12.0110
12 HC 1 XLMC H5 3 0.149092 1.0080
13 C 1 XLMC C9 3 -0.189466 12.0110
14 HC 1 XLMC H6 3 0.161711 1.0080
15 C 1 XLMC C4 4 0.297952 12.0110
16 C 1 XLMC C1 4 -0.216187 12.0110
17 HC 1 XLMC H1 4 0.103074 1.0080
18 C 1 XLMC C2 4 0.121018 12.0110
19 HC 1 XLMC H2 4 0.044773 1.0080
20 C 1 XLMC C3 5 0.085354 12.0110
21 NT 1 XLMC N2 5 -0.005816 14.0067
22 C 1 XLMC H13 5 -0.046668 12.080
23 C 1 XLMC C12 5 -0.166124 12.0110
24 HC 1 XLMC H14 5 0.140180 1.0080
25 C 1 XLMC C15 6 -0.182534 12.0110
26 HC 1 XLMC H17 6 0.103128 1.0080
27 C 1 XLMC C14 7 -0.112779 12.0110
28 HC 1 XLMC H16 7 0.099369 1.0080
29 C 1 XLMC C13 7 -0.084591 12.0110
30 HC 1 XLMC H15 7 0.112745 1.0080
31 C 1 XLMC C6 8 -0.189075 12.0110
32 HC 1 XLMC H4 8 0.153190 1.0080
33 C 1 XLMC C5 8 -0.148915 12.0110
34 HC 1 XLMC H3 8 0.156558 1.0080
35 HC 1 XLMC H3 8 0.084936 1.0080
```



```
36 HC 1 XLMC H3 8 0.018079 1.0080
37 HC 1 XLMC H3 8 0.052474 1.0080
```

[ bonds ]

```
; ai aj funct c0 c1
 1 2 2 0.1090 1.2300e+07
 2 3 2 0.1090 1.2300e+07
 2 4 2 0.1090 1.2300e+07
 2 5 2 0.1480 5.7300e+06
 5 6 2 0.1450 5.2319e+06
 5 7 2 0.1480 5.7300e+06
 6 11 2 0.1390 8.6600e+06
 6 31 2 0.1390 8.6600e+06
 7 8 2 0.1090 1.2300e+07
 7 9 2 0.1090 1.2300e+07
 7 10 2 0.1090 1.2300e+07
11 12 2 0.1080 1.5003e+07
11 13 2 0.1390 8.6600e+06
13 14 2 0.1090 1.2300e+07
13 15 2 0.1390 8.6600e+06
15 16 2 0.1480 5.7300e+06
15 33 2 0.1390 8.6600e+06
16 17 2 0.1090 1.2300e+07
16 18 2 0.1330 1.1800e+07
18 19 2 0.1080 1.5003e+07
18 20 2 0.1480 5.7300e+06
20 21 2 0.1360 1.0200e+07
20 25 2 0.1400 8.5400e+06
22 21 2 0.1480 5.7300e+06
21 23 2 0.1380 1.1000e+07
23 24 2 0.1090 1.2300e+07
23 29 2 0.1360 1.0200e+07
25 26 2 0.1090 1.2300e+07
25 27 2 0.1380 1.1000e+07
27 28 2 0.1090 1.2300e+07
27 29 2 0.1410 6.5389e+06
29 30 2 0.1090 1.2300e+07
31 32 2 0.1080 1.5003e+07
31 33 2 0.1390 8.6600e+06
33 34 2 0.1090 1.2300e+07
35 22 2 0.1090 1.2300e+07
36 22 2 0.1090 1.2300e+07
37 22 2 0.1090 1.2300e+07
```

[ pairs ]

```
; ai aj funct ; all 1-4 pairs but the ones excluded in GROMOS itp
 1 6 1
 1 7 1
 2 8 1
 2 9 1
 2 10 1
 2 11 1
 2 31 1
```

3 6 1  
3 7 1  
4 6 1  
4 7 1  
5 12 1  
5 13 1  
5 32 1  
5 33 1  
6 8 1  
6 9 1  
6 10 1  
6 14 1  
6 34 1  
7 11 1  
7 31 1  
11 16 1  
11 32 1  
12 14 1  
12 15 1  
12 31 1  
13 17 1  
13 18 1  
13 34 1  
14 16 1  
14 33 1  
15 19 1  
15 32 1  
16 21 1  
16 25 1  
16 31 1  
16 34 1  
17 19 1  
17 20 1  
17 33 1  
18 22 1  
18 23 1  
18 26 1  
18 27 1  
18 33 1  
19 21 1  
19 25 1  
20 24 1  
20 28 1  
21 26 1  
21 30 1  
22 24 1  
22 25 1  
22 29 1  
23 28 1  
24 27 1  
24 30 1  
25 30 1

26 28 1  
26 29 1  
28 30 1  
32 34 1  
35 23 1  
35 20 1  
36 23 1  
36 20 1  
37 23 1  
37 20 1

[ angles ]

```
; ai aj ak funct angle fc  
1 2 3 2 108.53 443.00  
1 2 4 2 108.53 443.00  
1 2 5 2 108.53 443.00  
3 2 4 2 108.53 443.00  
3 2 5 2 108.53 443.00  
4 2 5 2 108.53 443.00  
2 5 6 2 116.00 620.00  
2 5 7 2 111.00 530.00  
6 5 7 2 116.00 620.00  
5 6 11 2 120.00 560.00  
5 6 31 2 120.00 560.00  
11 6 31 2 120.00 560.00  
5 7 8 2 108.53 443.00  
5 7 9 2 108.53 443.00  
5 7 10 2 108.53 443.00  
8 7 9 2 108.53 443.00  
8 7 10 2 108.53 443.00  
9 7 10 2 108.53 443.00  
6 11 12 2 120.00 505.00  
6 11 13 2 120.00 560.00  
12 11 13 2 120.00 505.00  
11 13 14 2 120.00 505.00  
11 13 15 2 120.00 560.00  
14 13 15 2 120.00 505.00  
13 15 16 2 120.00 560.00  
13 15 33 2 120.00 560.00  
16 15 33 2 120.00 560.00  
15 16 17 2 114.00 1559.41  
15 16 18 2 126.00 640.00  
17 16 18 2 120.00 505.00  
16 18 19 2 117.00 505.00  
16 18 20 2 134.00 640.00  
19 18 20 2 109.00 1559.41  
18 20 21 2 123.00 560.00  
18 20 25 2 117.00 560.00  
21 20 25 2 120.00 610.00  
20 21 22 2 124.00 390.00  
20 21 23 2 120.00 730.00
```

|    |    |    |   |        |        |
|----|----|----|---|--------|--------|
| 22 | 21 | 23 | 2 | 116.00 | 465.00 |
| 21 | 23 | 24 | 2 | 120.00 | 505.00 |
| 21 | 23 | 29 | 2 | 120.00 | 560.00 |
| 24 | 23 | 29 | 2 | 126.00 | 575.00 |
| 20 | 25 | 26 | 2 | 120.00 | 505.00 |
| 20 | 25 | 27 | 2 | 120.00 | 560.00 |
| 26 | 25 | 27 | 2 | 120.00 | 505.00 |
| 25 | 27 | 28 | 2 | 120.00 | 505.00 |
| 25 | 27 | 29 | 2 | 120.00 | 560.00 |
| 28 | 27 | 29 | 2 | 120.00 | 505.00 |
| 23 | 29 | 27 | 2 | 120.00 | 560.00 |
| 23 | 29 | 30 | 2 | 120.00 | 505.00 |
| 27 | 29 | 30 | 2 | 120.00 | 505.00 |
| 6  | 31 | 32 | 2 | 120.00 | 505.00 |
| 6  | 31 | 33 | 2 | 120.00 | 560.00 |
| 32 | 31 | 33 | 2 | 120.00 | 505.00 |
| 15 | 33 | 31 | 2 | 120.00 | 560.00 |
| 15 | 33 | 34 | 2 | 120.00 | 505.00 |
| 31 | 33 | 34 | 2 | 120.00 | 505.00 |
| 35 | 22 | 21 | 2 | 108.53 | 443.00 |
| 36 | 22 | 21 | 2 | 108.53 | 443.00 |
| 37 | 22 | 21 | 2 | 108.53 | 443.00 |
| 35 | 22 | 36 | 2 | 108.53 | 443.00 |
| 35 | 22 | 37 | 2 | 108.53 | 443.00 |
| 36 | 22 | 37 | 2 | 108.53 | 443.00 |

[ dihedrals ]

; GROMOS improper dihedrals

| ; ai | aj | ak | al | funct | angle | fc     |
|------|----|----|----|-------|-------|--------|
| 16   | 18 | 17 | 15 | 2     | 0.00  | 167.36 |
| 18   | 16 | 20 | 19 | 2     | 0.00  | 167.36 |
| 20   | 18 | 21 | 25 | 2     | 0.00  | 900.36 |
| 15   | 16 | 33 | 13 | 2     | 0.00  | 900.36 |
| 33   | 15 | 31 | 34 | 2     | 0.00  | 167.36 |
| 31   | 33 | 6  | 32 | 2     | 0.00  | 167.36 |
| 6    | 31 | 11 | 5  | 2     | 0.00  | 900.36 |
| 11   | 6  | 13 | 12 | 2     | 0.00  | 167.36 |
| 13   | 15 | 11 | 14 | 2     | 0.00  | 167.36 |
| 21   | 20 | 23 | 22 | 2     | 0.00  | 167.36 |
| 23   | 21 | 29 | 24 | 2     | 0.00  | 167.36 |
| 29   | 23 | 27 | 30 | 2     | 0.00  | 167.36 |
| 27   | 29 | 25 | 28 | 2     | 0.00  | 167.36 |
| 25   | 20 | 27 | 26 | 2     | 0.00  | 167.36 |
| 7    | 5  | 6  | 11 | 2     | 0.0   | 900.0  |

[ dihedrals ]

| ; ai | aj | ak | al | funct | ph0    | cp    | mult |
|------|----|----|----|-------|--------|-------|------|
| 3    | 2  | 5  | 6  | 1     | 180.00 | 1.00  | 6    |
| 7    | 5  | 6  | 31 | 1     | 180.00 | 33.50 | 2    |
| 6    | 5  | 7  | 8  | 1     | 180.00 | 1.00  | 6    |
| 31   | 6  | 11 | 13 | 1     | 180.00 | 41.80 | 2    |
| 11   | 6  | 31 | 33 | 1     | 180.00 | 41.80 | 2    |

|    |    |    |    |   |        |       |   |
|----|----|----|----|---|--------|-------|---|
| 6  | 11 | 13 | 15 | 1 | 180.00 | 41.80 | 2 |
| 11 | 13 | 15 | 33 | 1 | 180.00 | 41.80 | 2 |
| 33 | 15 | 16 | 18 | 1 | 180.00 | 24.00 | 2 |
| 13 | 15 | 33 | 31 | 1 | 180.00 | 41.80 | 2 |
| 15 | 16 | 18 | 20 | 1 | 180.00 | 41.80 | 2 |
| 16 | 18 | 20 | 21 | 1 | 180.00 | -7.00 | 2 |
| 25 | 20 | 21 | 23 | 1 | 180.00 | 41.80 | 2 |
| 21 | 20 | 25 | 27 | 1 | 180.00 | 41.80 | 2 |
| 20 | 21 | 23 | 29 | 1 | 180.00 | 41.80 | 2 |
| 21 | 23 | 29 | 27 | 1 | 180.00 | 41.80 | 2 |
| 20 | 25 | 27 | 29 | 1 | 180.00 | 41.80 | 2 |
| 25 | 27 | 29 | 23 | 1 | 180.00 | 41.80 | 2 |
| 6  | 31 | 33 | 15 | 1 | 180.00 | 41.80 | 2 |
| 35 | 22 | 21 | 23 | 1 | 180.00 | 1.00  | 6 |

[ exclusions ]

; ai aj funct ; GROMOS 1-4 exclusions

|    |    |
|----|----|
| 6  | 15 |
| 11 | 33 |
| 13 | 31 |
| 15 | 20 |
| 20 | 29 |
| 21 | 27 |
| 23 | 25 |

### 3. SIMULATION BOX DASPMI IN WATER (.gro format)

DASPMI in water

2170

|       |     |    |       |       |       |         |         |         |
|-------|-----|----|-------|-------|-------|---------|---------|---------|
| 1XLMC | H12 | 1  | 1.504 | 0.448 | 2.215 | -0.5801 | 0.8433  | -1.5442 |
| 1XLMC | C11 | 2  | 1.518 | 0.362 | 2.149 | 0.0440  | 0.0042  | -0.3481 |
| 1XLMC | H10 | 3  | 1.472 | 0.388 | 2.054 | -1.2067 | 3.0023  | 0.9710  |
| 1XLMC | H11 | 4  | 1.464 | 0.278 | 2.193 | -0.8137 | 0.2080  | -0.9900 |
| 1XLMC | N1  | 5  | 1.660 | 0.323 | 2.136 | 0.0185  | -0.1773 | -0.1043 |
| 1XLMC | C7  | 6  | 1.757 | 0.372 | 2.231 | -0.6797 | 0.5777  | 0.2248  |
| 1XLMC | C10 | 7  | 1.698 | 0.273 | 2.001 | 0.5943  | -0.7031 | 0.2463  |
| 1XLMC | H7  | 8  | 1.627 | 0.310 | 1.927 | -0.0953 | 0.3571  | 1.3857  |
| 1XLMC | H8  | 9  | 1.799 | 0.308 | 1.980 | 0.7602  | -0.1899 | 1.7122  |
| 1XLMC | H9  | 10 | 1.688 | 0.165 | 1.992 | -0.2133 | -0.6255 | 0.1416  |
| 1XLMC | C8  | 11 | 1.893 | 0.370 | 2.203 | -0.6666 | -0.8890 | 0.3166  |
| 1XLMC | H5  | 12 | 1.926 | 0.344 | 2.103 | -0.0920 | -0.2807 | 0.3399  |
| 1XLMC | C9  | 13 | 1.993 | 0.399 | 2.295 | -0.2604 | -0.4579 | -0.2467 |
| 1XLMC | H6  | 14 | 2.096 | 0.396 | 2.261 | -0.8299 | 2.5517  | -2.7703 |
| 1XLMC | C4  | 15 | 1.959 | 0.429 | 2.427 | 0.2164  | -0.4500 | -0.1246 |
| 1XLMC | C1  | 16 | 2.057 | 0.435 | 2.538 | 0.2163  | 0.4536  | -0.1654 |
| 1XLMC | H1  | 17 | 2.019 | 0.474 | 2.632 | -1.5131 | -4.3996 | 1.4823  |
| 1XLMC | C2  | 18 | 2.184 | 0.402 | 2.520 | 0.0655  | -0.3458 | 0.2135  |
| 1XLMC | H2  | 19 | 2.209 | 0.339 | 2.436 | 1.5471  | 0.1096  | 0.2836  |
| 1XLMC | C3  | 20 | 2.293 | 0.396 | 2.621 | 0.0956  | -0.2775 | 0.1839  |
| 1XLMC | N2  | 21 | 2.426 | 0.392 | 2.594 | 0.0677  | -0.0437 | 0.0132  |

|       |     |    |       |       |        |         |         |         |
|-------|-----|----|-------|-------|--------|---------|---------|---------|
| 1XLMC | C   | 22 | 2.480 | 0.427 | 2.461  | 0.4503  | -0.2349 | 0.1168  |
| 1XLMC | C12 | 23 | 2.529 | 0.358 | 2.679  | -0.1435 | -0.6298 | 0.0357  |
| 1XLMC | H14 | 24 | 2.622 | 0.318 | 2.638  | -0.1728 | -0.8073 | 0.1389  |
| 1XLMC | C15 | 25 | 2.266 | 0.388 | 2.758  | 0.1618  | 0.5299  | 0.2464  |
| 1XLMC | H17 | 26 | 2.166 | 0.418 | 2.790  | -0.5075 | 0.0221  | -1.2618 |
| 1XLMC | C14 | 27 | 2.368 | 0.369 | 2.849  | 0.4569  | 0.1609  | -0.1596 |
| 1XLMC | H16 | 28 | 2.347 | 0.368 | 2.956  | 0.0298  | -1.6586 | -0.2355 |
| 1XLMC | C13 | 29 | 2.504 | 0.352 | 2.812  | 0.5399  | 0.0460  | 0.2029  |
| 1XLMC | H15 | 30 | 2.576 | 0.328 | 2.890  | 1.1521  | 2.0490  | 0.2930  |
| 1XLMC | C6  | 31 | 1.729 | 0.425 | 2.357  | -0.1703 | 0.5912  | 0.3370  |
| 1XLMC | H4  | 32 | 1.628 | 0.421 | 2.397  | 0.5869  | 0.9935  | 2.4062  |
| 1XLMC | C5  | 33 | 1.825 | 0.453 | 2.453  | 0.3118  | -0.1389 | 0.0805  |
| 1XLMC | H3  | 34 | 1.787 | 0.460 | 2.555  | 1.2156  | -2.0223 | 0.5832  |
| 1XLMC | H3  | 35 | 2.580 | 0.469 | 2.452  | -0.0172 | 1.3012  | 1.6308  |
| 1XLMC | H3  | 36 | 2.467 | 0.341 | 2.394  | 3.1644  | -0.4945 | -0.1915 |
| 1XLMC | H3  | 37 | 2.415 | 0.508 | 2.427  | -0.5615 | 0.3646  | 3.2101  |
| 2SOL  | OW  | 38 | 1.826 | 1.757 | 0.439  | 0.1429  | 0.0016  | 0.2258  |
| 2SOL  | HW1 | 39 | 1.778 | 1.823 | 0.497  | 0.3459  | -0.1060 | 0.5184  |
| 2SOL  | HW2 | 40 | 1.899 | 1.714 | 0.491  | -0.4208 | -0.9618 | 0.2535  |
| 3SOL  | OW  | 41 | 1.625 | 2.293 | 1.095  | -0.0513 | 0.0378  | 0.0422  |
| 3SOL  | HW1 | 42 | 1.579 | 2.371 | 1.139  | 0.3951  | 0.8403  | -0.8720 |
| 3SOL  | HW2 | 43 | 1.558 | 2.222 | 1.075  | -0.3658 | -0.0681 | 1.4224  |
| 4SOL  | OW  | 44 | 2.814 | 2.468 | 1.284  | -0.4225 | -0.0802 | -0.1454 |
| 4SOL  | HW1 | 45 | 2.846 | 2.549 | 1.334  | 1.8058  | -0.8877 | -0.1464 |
| 4SOL  | HW2 | 46 | 2.714 | 2.465 | 1.286  | -0.5030 | 1.5765  | 1.5738  |
| 5SOL  | OW  | 47 | 1.322 | 2.486 | 1.041  | -0.1365 | -0.7969 | 0.3563  |
| 5SOL  | HW1 | 48 | 1.301 | 2.440 | 1.127  | 2.1560  | -0.7840 | 1.0066  |
| 5SOL  | HW2 | 49 | 1.403 | 2.544 | 1.054  | -1.0884 | 1.0106  | -1.2363 |
| 6SOL  | OW  | 50 | 1.868 | 2.042 | 0.046  | 0.4227  | -0.3068 | -0.5422 |
| 6SOL  | HW1 | 51 | 1.769 | 2.029 | 0.050  | 0.4755  | -0.7674 | -0.6766 |
| 6SOL  | HW2 | 52 | 1.891 | 2.109 | -0.024 | 0.0294  | 1.8223  | 1.2362  |
| 7SOL  | OW  | 53 | 2.614 | 2.406 | 0.191  | 0.0501  | 0.5145  | 0.2123  |
| 7SOL  | HW1 | 54 | 2.535 | 2.410 | 0.252  | 0.0525  | 1.8627  | 0.1563  |
| 7SOL  | HW2 | 55 | 2.625 | 2.313 | 0.158  | -1.8234 | 0.3892  | -0.1818 |
| 8SOL  | OW  | 56 | 1.338 | 2.023 | 1.820  | -0.1490 | 0.8239  | -0.1709 |
| 8SOL  | HW1 | 57 | 1.337 | 2.085 | 1.899  | -0.9999 | -0.0476 | 0.5328  |
| 8SOL  | HW2 | 58 | 1.249 | 2.026 | 1.774  | -0.1222 | 0.2933  | -0.2627 |
| 9SOL  | OW  | 59 | 0.130 | 1.605 | 0.645  | -0.7229 | 0.3288  | -0.3250 |
| 9SOL  | HW1 | 60 | 0.052 | 1.636 | 0.699  | -0.6957 | 1.1311  | -0.7255 |
| 9SOL  | HW2 | 61 | 0.127 | 1.505 | 0.636  | 0.1792  | -0.0448 | 2.5512  |
| 10SOL | OW  | 62 | 0.629 | 2.711 | 0.716  | -0.5153 | 0.4722  | 0.5417  |
| 10SOL | HW1 | 63 | 0.664 | 2.678 | 0.804  | 0.7723  | -0.2686 | -0.2175 |
| 10SOL | HW2 | 64 | 0.535 | 2.679 | 0.703  | -0.0716 | -1.0277 | 0.8335  |
| 11SOL | OW  | 65 | 0.548 | 0.166 | 0.065  | 0.2432  | 0.5891  | -0.2805 |
| 11SOL | HW1 | 66 | 0.574 | 0.183 | -0.030 | -2.2926 | 0.9422  | -0.9647 |
| 11SOL | HW2 | 67 | 0.609 | 0.217 | 0.125  | 0.9580  | 1.5613  | -1.7609 |
| 12SOL | OW  | 68 | 2.738 | 1.779 | 0.493  | 0.0775  | -0.1508 | -0.6415 |
| 12SOL | HW1 | 69 | 2.745 | 1.680 | 0.511  | -2.0777 | -0.4563 | -1.2105 |
| 12SOL | HW2 | 70 | 2.764 | 1.829 | 0.576  | -1.5608 | -1.2993 | 0.6384  |
| 13SOL | OW  | 71 | 1.290 | 0.557 | 0.500  | 0.9540  | -0.3140 | 0.3624  |
| 13SOL | HW1 | 72 | 1.276 | 0.520 | 0.591  | 1.1224  | 0.0935  | 0.5573  |
| 13SOL | HW2 | 73 | 1.224 | 0.518 | 0.437  | -0.7401 | 1.1624  | 1.1470  |

|       |     |     |        |       |       |         |         |         |
|-------|-----|-----|--------|-------|-------|---------|---------|---------|
| 14SOL | OW  | 74  | 2.678  | 1.182 | 0.576 | 0.4895  | 0.1934  | -0.1517 |
| 14SOL | HW1 | 75  | 2.647  | 1.249 | 0.509 | 1.2620  | 1.7565  | 0.9947  |
| 14SOL | HW2 | 76  | 2.711  | 1.229 | 0.658 | 1.5043  | -1.5787 | 0.5138  |
| 15SOL | OW  | 77  | 2.022  | 1.106 | 1.046 | 0.0477  | -0.0021 | 0.2861  |
| 15SOL | HW1 | 78  | 2.066  | 1.023 | 1.080 | 1.0761  | 0.0420  | -0.8701 |
| 15SOL | HW2 | 79  | 2.073  | 1.186 | 1.077 | 1.6011  | 0.0048  | -2.0730 |
| 16SOL | OW  | 80  | 1.806  | 3.114 | 2.120 | 0.3070  | -0.2134 | -0.1079 |
| 16SOL | HW1 | 81  | 1.736  | 3.065 | 2.068 | -1.6644 | -0.3077 | 2.4130  |
| 16SOL | HW2 | 82  | 1.889  | 3.122 | 2.065 | -1.2987 | -1.0209 | -2.8629 |
| 17SOL | OW  | 83  | 1.354  | 1.726 | 1.289 | -0.0898 | -0.2622 | 0.1905  |
| 17SOL | HW1 | 84  | 1.280  | 1.723 | 1.221 | -2.6176 | -0.6272 | 2.7626  |
| 17SOL | HW2 | 85  | 1.383  | 1.632 | 1.310 | -2.2048 | -0.5094 | 2.4112  |
| 18SOL | OW  | 86  | 1.210  | 2.094 | 0.955 | 0.4635  | 0.5917  | 0.7022  |
| 18SOL | HW1 | 87  | 1.251  | 2.158 | 0.890 | -0.6958 | -0.9157 | -1.6367 |
| 18SOL | HW2 | 88  | 1.119  | 2.126 | 0.981 | -0.6163 | -0.5388 | -1.3872 |
| 19SOL | OW  | 89  | 1.210  | 3.096 | 0.215 | -0.3228 | -0.7937 | 0.2609  |
| 19SOL | HW1 | 90  | 1.116  | 3.062 | 0.216 | -1.0613 | 1.0898  | 1.7415  |
| 19SOL | HW2 | 91  | 1.212  | 3.188 | 0.175 | 1.0711  | -1.1643 | -0.6148 |
| 20SOL | OW  | 92  | 1.318  | 2.400 | 1.299 | 0.0702  | -0.4977 | 0.1412  |
| 20SOL | HW1 | 93  | 1.384  | 2.466 | 1.335 | -0.1253 | 0.3467  | -0.9933 |
| 20SOL | HW2 | 94  | 1.311  | 2.323 | 1.362 | 0.2927  | 0.5539  | 1.5074  |
| 21SOL | OW  | 95  | 2.481  | 3.015 | 1.450 | 0.1472  | 0.7923  | 0.0411  |
| 21SOL | HW1 | 96  | 2.525  | 3.028 | 1.539 | -0.9838 | 0.1660  | 0.7190  |
| 21SOL | HW2 | 97  | 2.507  | 3.090 | 1.388 | -0.1671 | 2.0147  | 1.3486  |
| 22SOL | OW  | 98  | 1.233  | 2.622 | 0.371 | -0.0574 | -0.0341 | -0.0994 |
| 22SOL | HW1 | 99  | 1.257  | 2.719 | 0.374 | -0.4157 | 0.1423  | -1.9375 |
| 22SOL | HW2 | 100 | 1.134  | 2.611 | 0.382 | 0.1749  | -0.3732 | 2.0803  |
| 23SOL | OW  | 101 | 2.501  | 1.319 | 0.861 | -0.3579 | 0.2487  | 0.2241  |
| 23SOL | HW1 | 102 | 2.443  | 1.299 | 0.782 | -2.1789 | 2.7686  | 0.7803  |
| 23SOL | HW2 | 103 | 2.533  | 1.414 | 0.856 | 1.7174  | -0.3318 | 1.2215  |
| 24SOL | OW  | 104 | 0.031  | 0.708 | 0.894 | 0.2529  | -0.3563 | 0.5118  |
| 24SOL | HW1 | 105 | 0.092  | 0.786 | 0.883 | -1.0674 | 0.6324  | -0.0713 |
| 24SOL | HW2 | 106 | -0.055 | 0.738 | 0.936 | -0.5041 | -1.3819 | -0.2434 |
| 25SOL | OW  | 107 | 0.264  | 1.893 | 1.739 | 0.4366  | -0.4749 | 0.1874  |
| 25SOL | HW1 | 108 | 0.254  | 1.956 | 1.662 | -1.0114 | 0.1665  | 0.8752  |
| 25SOL | HW2 | 109 | 0.358  | 1.896 | 1.773 | 0.8636  | -0.1128 | -0.9809 |
| 26SOL | OW  | 110 | 2.369  | 2.499 | 1.984 | 0.2397  | 0.0421  | -0.5512 |
| 26SOL | HW1 | 111 | 2.305  | 2.551 | 1.927 | 0.2439  | -1.1037 | -1.6474 |
| 26SOL | HW2 | 112 | 2.447  | 2.469 | 1.929 | -0.1840 | -1.8468 | -0.2082 |
| 27SOL | OW  | 113 | 0.603  | 0.609 | 1.101 | 0.6454  | 0.1564  | 0.4349  |
| 27SOL | HW1 | 114 | 0.651  | 0.654 | 1.176 | 0.6517  | 1.6345  | -0.4263 |
| 27SOL | HW2 | 115 | 0.590  | 0.673 | 1.025 | -0.6964 | -0.8547 | -0.2479 |
| 28SOL | OW  | 116 | 0.980  | 2.698 | 1.916 | 0.2965  | 0.3509  | -0.0608 |
| 28SOL | HW1 | 117 | 1.034  | 2.673 | 1.996 | 1.6765  | 0.7363  | -0.8348 |
| 28SOL | HW2 | 118 | 0.894  | 2.648 | 1.916 | 0.1117  | 0.6139  | 1.8424  |
| 29SOL | OW  | 119 | 0.068  | 0.417 | 1.075 | 0.3293  | 0.6099  | -0.3223 |
| 29SOL | HW1 | 120 | 0.094  | 0.382 | 0.985 | -1.4628 | -1.7758 | -0.0292 |
| 29SOL | HW2 | 121 | 0.130  | 0.380 | 1.145 | -0.7471 | -1.0269 | -0.1720 |
| 30SOL | OW  | 122 | 0.543  | 2.830 | 1.794 | -0.2415 | 0.1790  | -0.1609 |
| 30SOL | HW1 | 123 | 0.629  | 2.869 | 1.826 | -1.2494 | 0.8430  | 1.8983  |
| 30SOL | HW2 | 124 | 0.471  | 2.847 | 1.861 | -2.3975 | 1.0764  | -2.5165 |
| 31SOL | OW  | 125 | 2.086  | 0.690 | 1.909 | -0.4729 | 0.0393  | 0.8900  |

|       |     |     |       |       |       |         |         |         |
|-------|-----|-----|-------|-------|-------|---------|---------|---------|
| 31SOL | HW1 | 126 | 1.997 | 0.716 | 1.946 | -0.4994 | 0.0179  | 0.8412  |
| 31SOL | HW2 | 127 | 2.149 | 0.768 | 1.915 | -0.9068 | 0.5179  | -0.3949 |
| 32SOL | OW  | 128 | 2.144 | 2.444 | 1.466 | 0.3370  | -0.1036 | -0.5367 |
| 32SOL | HW1 | 129 | 2.087 | 2.525 | 1.455 | 0.5388  | -0.0026 | -0.8357 |
| 32SOL | HW2 | 130 | 2.240 | 2.467 | 1.448 | 0.7332  | 0.1285  | 1.5555  |
| 33SOL | OW  | 131 | 2.665 | 2.276 | 1.528 | 0.2933  | -0.1467 | -0.4594 |
| 33SOL | HW1 | 132 | 2.620 | 2.324 | 1.604 | 1.8568  | 5.0582  | -2.3835 |
| 33SOL | HW2 | 133 | 2.762 | 2.266 | 1.549 | 0.6285  | 0.8284  | -1.4630 |
| 34SOL | OW  | 134 | 1.510 | 0.692 | 1.290 | 0.1773  | 0.1102  | -0.9151 |
| 34SOL | HW1 | 135 | 1.431 | 0.706 | 1.230 | 2.1039  | 1.7056  | -3.2629 |
| 34SOL | HW2 | 136 | 1.586 | 0.655 | 1.238 | 1.1910  | -0.9274 | 1.1726  |
| 35SOL | OW  | 137 | 1.327 | 0.990 | 0.251 | 0.3113  | -0.6238 | -0.1309 |
| 35SOL | HW1 | 138 | 1.227 | 0.990 | 0.254 | 0.3075  | -0.2359 | -0.2827 |
| 35SOL | HW2 | 139 | 1.358 | 0.988 | 0.156 | 0.4463  | -0.1792 | -0.0993 |
| 36SOL | OW  | 140 | 2.547 | 1.155 | 1.976 | -0.1219 | 0.1299  | -0.0220 |
| 36SOL | HW1 | 141 | 2.508 | 1.233 | 2.024 | 1.3142  | 1.6434  | -1.1742 |
| 36SOL | HW2 | 142 | 2.516 | 1.070 | 2.018 | -1.7778 | 1.3058  | 1.2434  |
| 37SOL | OW  | 143 | 1.794 | 2.139 | 1.231 | -0.0137 | -0.6677 | 0.1844  |
| 37SOL | HW1 | 144 | 1.779 | 2.045 | 1.202 | 0.7449  | -0.8121 | 0.2315  |
| 37SOL | HW2 | 145 | 1.726 | 2.199 | 1.189 | -0.2179 | -1.1748 | -0.2076 |
| 38SOL | OW  | 146 | 2.006 | 2.877 | 1.170 | 0.1507  | -0.4765 | 0.7176  |
| 38SOL | HW1 | 147 | 2.086 | 2.875 | 1.230 | 2.0269  | 0.7698  | -1.6100 |
| 38SOL | HW2 | 148 | 1.933 | 2.929 | 1.215 | 0.7714  | -1.1719 | 2.6647  |
| 39SOL | OW  | 149 | 1.566 | 2.626 | 0.996 | 0.2330  | -0.2547 | 0.4631  |
| 39SOL | HW1 | 150 | 1.541 | 2.626 | 0.899 | 1.1246  | -2.0798 | 0.2025  |
| 39SOL | HW2 | 151 | 1.650 | 2.679 | 1.009 | 0.3099  | -0.3027 | 0.1747  |
| 40SOL | OW  | 152 | 2.970 | 0.855 | 1.040 | 0.0218  | 0.0910  | -0.6090 |
| 40SOL | HW1 | 153 | 2.993 | 0.949 | 1.012 | -0.9044 | 1.2319  | 2.1534  |
| 40SOL | HW2 | 154 | 2.871 | 0.847 | 1.050 | -0.0868 | -1.7709 | -2.4589 |
| 41SOL | OW  | 155 | 2.552 | 1.974 | 0.415 | 0.2659  | 0.0426  | -0.2347 |
| 41SOL | HW1 | 156 | 2.618 | 1.905 | 0.442 | -0.4763 | -0.4849 | 0.2740  |
| 41SOL | HW2 | 157 | 2.581 | 2.063 | 0.449 | 0.2952  | -0.3208 | 0.7230  |
| 42SOL | OW  | 158 | 0.482 | 1.455 | 1.127 | -0.0166 | 0.0963  | 0.0355  |
| 42SOL | HW1 | 159 | 0.426 | 1.496 | 1.056 | -1.6768 | -0.4000 | 1.0004  |
| 42SOL | HW2 | 160 | 0.533 | 1.378 | 1.089 | 0.5449  | 0.9548  | -1.0025 |
| 43SOL | OW  | 161 | 1.527 | 1.749 | 0.976 | 0.1598  | 0.2751  | -0.0045 |
| 43SOL | HW1 | 162 | 1.506 | 1.671 | 1.035 | -1.9586 | 0.6895  | -0.1284 |
| 43SOL | HW2 | 163 | 1.527 | 1.833 | 1.030 | -1.1747 | 0.5806  | -0.4275 |
| 44SOL | OW  | 164 | 0.464 | 1.728 | 0.850 | -0.6278 | 0.4666  | -0.1458 |
| 44SOL | HW1 | 165 | 0.417 | 1.640 | 0.861 | 0.4572  | -0.3555 | -1.7344 |
| 44SOL | HW2 | 166 | 0.470 | 1.773 | 0.939 | -0.8524 | -1.2496 | 0.7930  |
| 45SOL | OW  | 167 | 2.517 | 2.120 | 2.097 | -0.2401 | -0.3225 | -0.6246 |
| 45SOL | HW1 | 168 | 2.599 | 2.168 | 2.065 | 0.2391  | -0.0805 | 0.8949  |
| 45SOL | HW2 | 169 | 2.440 | 2.184 | 2.099 | 0.2443  | 0.2644  | 0.7595  |
| 46SOL | OW  | 170 | 2.714 | 2.678 | 2.007 | -0.0328 | 0.4651  | 0.3979  |
| 46SOL | HW1 | 171 | 2.698 | 2.612 | 2.081 | 0.0660  | -0.2701 | -0.2322 |
| 46SOL | HW2 | 172 | 2.768 | 2.754 | 2.042 | 1.4600  | -0.6924 | 0.6859  |
| 47SOL | OW  | 173 | 0.789 | 3.032 | 1.154 | -0.4860 | 0.1094  | -0.2790 |
| 47SOL | HW1 | 174 | 0.832 | 2.954 | 1.199 | 0.8380  | 1.1501  | 0.3300  |
| 47SOL | HW2 | 175 | 0.742 | 3.088 | 1.221 | 1.6642  | 1.7787  | -0.0410 |
| 48SOL | OW  | 176 | 1.058 | 0.956 | 1.003 | 0.2728  | 0.1470  | -0.1637 |
| 48SOL | HW1 | 177 | 1.154 | 0.957 | 0.973 | -0.3535 | -1.4266 | -2.4823 |



|       |     |     |        |       |       |         |         |         |
|-------|-----|-----|--------|-------|-------|---------|---------|---------|
| 48SOL | HW2 | 178 | 1.032  | 0.863 | 1.027 | -0.4733 | 0.7084  | 1.2945  |
| 49SOL | OW  | 179 | 2.904  | 1.910 | 1.427 | -0.3122 | -0.1513 | 0.7375  |
| 49SOL | HW1 | 180 | 2.920  | 1.815 | 1.453 | -2.5003 | -0.7630 | 0.1307  |
| 49SOL | HW2 | 181 | 2.911  | 1.919 | 1.328 | 0.6114  | 0.5078  | 0.8505  |
| 50SOL | OW  | 182 | 2.211  | 1.790 | 2.033 | -0.1261 | 0.0973  | 0.2785  |
| 50SOL | HW1 | 183 | 2.309  | 1.808 | 2.034 | -0.1399 | 0.2027  | 1.6715  |
| 50SOL | HW2 | 184 | 2.170  | 1.834 | 1.953 | 0.9210  | 0.2590  | -0.1793 |
| 51SOL | OW  | 185 | 1.546  | 2.440 | 1.691 | -0.1208 | 0.2915  | -0.2293 |
| 51SOL | HW1 | 186 | 1.587  | 2.468 | 1.778 | 1.4742  | 0.1304  | -0.9080 |
| 51SOL | HW2 | 187 | 1.532  | 2.341 | 1.692 | 0.5003  | 0.2016  | -0.4043 |
| 52SOL | OW  | 188 | 0.009  | 2.823 | 1.725 | -0.3992 | -0.8272 | 0.0302  |
| 52SOL | HW1 | 189 | -0.040 | 2.795 | 1.808 | 0.7077  | -1.5897 | 0.4359  |
| 52SOL | HW2 | 190 | 0.096  | 2.864 | 1.749 | -0.0274 | -1.1260 | -0.7617 |
| 53SOL | OW  | 191 | 0.773  | 0.647 | 0.204 | -0.5747 | -0.0073 | 0.1559  |
| 53SOL | HW1 | 192 | 0.745  | 0.672 | 0.112 | -0.3351 | -2.6789 | -0.7385 |
| 53SOL | HW2 | 193 | 0.693  | 0.622 | 0.258 | -0.6703 | 1.0751  | 0.5261  |
| 54SOL | OW  | 194 | 2.421  | 0.993 | 1.644 | 0.5333  | 0.4423  | 0.5237  |
| 54SOL | HW1 | 195 | 2.496  | 0.963 | 1.704 | -0.6298 | -2.5789 | 0.6725  |
| 54SOL | HW2 | 196 | 2.412  | 0.929 | 1.568 | -1.4235 | 1.1308  | 0.1188  |
| 55SOL | OW  | 197 | 2.125  | 0.891 | 1.114 | 0.3372  | 0.0661  | -0.5925 |
| 55SOL | HW1 | 198 | 2.031  | 0.864 | 1.089 | -0.0793 | 1.0362  | -0.1289 |
| 55SOL | HW2 | 199 | 2.183  | 0.810 | 1.116 | -0.6067 | -0.6292 | -0.3981 |
| 56SOL | OW  | 200 | 2.361  | 1.099 | 0.433 | -0.0059 | -0.2416 | 0.1274  |
| 56SOL | HW1 | 201 | 2.373  | 1.136 | 0.525 | 2.7845  | 0.2109  | -0.3255 |
| 56SOL | HW2 | 202 | 2.324  | 1.171 | 0.374 | 0.2567  | 0.1366  | 0.4168  |
| 57SOL | OW  | 203 | 2.016  | 0.983 | 2.107 | 0.1546  | 0.7697  | -0.0170 |
| 57SOL | HW1 | 204 | 2.107  | 0.940 | 2.108 | -0.4971 | -0.7091 | -1.2917 |
| 57SOL | HW2 | 205 | 2.004  | 1.033 | 2.021 | -0.6599 | -0.0174 | -0.3715 |
| 58SOL | OW  | 206 | 1.022  | 2.840 | 1.215 | -0.3103 | -0.1533 | -0.0919 |
| 58SOL | HW1 | 207 | 1.058  | 2.899 | 1.142 | 1.6115  | 1.4920  | 2.0415  |
| 58SOL | HW2 | 208 | 0.999  | 2.751 | 1.177 | 1.3856  | 0.3449  | -2.5639 |
| 59SOL | OW  | 209 | 2.963  | 2.997 | 0.956 | -0.2837 | -0.2822 | 0.0616  |
| 59SOL | HW1 | 210 | 2.952  | 2.923 | 1.022 | 2.3683  | -1.1076 | -0.2888 |
| 59SOL | HW2 | 211 | 3.060  | 3.020 | 0.948 | -0.5737 | 0.3034  | -2.9688 |
| 60SOL | OW  | 212 | 1.621  | 2.627 | 0.729 | 0.4182  | -0.0047 | 0.3175  |
| 60SOL | HW1 | 213 | 1.634  | 2.530 | 0.748 | 1.9215  | 0.1497  | 0.2069  |
| 60SOL | HW2 | 214 | 1.708  | 2.675 | 0.741 | 0.4202  | 0.8704  | -2.4676 |
| 61SOL | OW  | 215 | 2.754  | 2.448 | 0.554 | 0.0418  | 0.1971  | 0.6375  |
| 61SOL | HW1 | 216 | 2.683  | 2.479 | 0.618 | -0.1643 | -0.5224 | 0.7633  |
| 61SOL | HW2 | 217 | 2.787  | 2.526 | 0.500 | -0.9579 | 0.5004  | 0.4591  |
| 62SOL | OW  | 218 | 1.209  | 2.916 | 1.440 | -0.4840 | 0.2788  | -0.6704 |
| 62SOL | HW1 | 219 | 1.149  | 2.871 | 1.374 | 0.3716  | -0.9411 | -0.6359 |
| 62SOL | HW2 | 220 | 1.249  | 2.848 | 1.501 | 0.9779  | 1.0516  | -0.7240 |
| 63SOL | OW  | 221 | 1.804  | 1.516 | 1.213 | -0.1193 | 0.3814  | 0.4593  |
| 63SOL | HW1 | 222 | 1.853  | 1.440 | 1.255 | 0.3948  | 0.5317  | 0.1371  |
| 63SOL | HW2 | 223 | 1.771  | 1.488 | 1.123 | 1.2627  | 0.9617  | -0.2566 |
| 64SOL | OW  | 224 | 2.021  | 2.487 | 0.683 | -0.1945 | -0.4708 | -0.4804 |
| 64SOL | HW1 | 225 | 2.095  | 2.555 | 0.681 | -0.4873 | -0.1567 | -0.8328 |
| 64SOL | HW2 | 226 | 2.041  | 2.419 | 0.754 | -0.1603 | 0.2834  | 0.2600  |
| 65SOL | OW  | 227 | 1.310  | 2.209 | 1.478 | -0.5461 | -0.2833 | 1.0939  |
| 65SOL | HW1 | 228 | 1.284  | 2.119 | 1.444 | -0.7105 | -0.0769 | 0.6677  |
| 65SOL | HW2 | 229 | 1.387  | 2.199 | 1.542 | -0.1926 | -0.6701 | 0.6222  |

|       |     |     |       |       |        |         |         |         |
|-------|-----|-----|-------|-------|--------|---------|---------|---------|
| 66SOL | OW  | 230 | 0.495 | 3.126 | 2.000  | 0.0150  | 0.0503  | -0.2330 |
| 66SOL | HW1 | 231 | 0.533 | 3.146 | 1.909  | -0.5208 | -0.2394 | -0.5226 |
| 66SOL | HW2 | 232 | 0.408 | 3.079 | 1.990  | 1.5609  | -3.2127 | 0.4083  |
| 67SOL | OW  | 233 | 3.105 | 1.457 | 1.932  | 0.7531  | -0.0464 | -0.3379 |
| 67SOL | HW1 | 234 | 3.051 | 1.540 | 1.941  | 0.5049  | -0.2130 | -0.2834 |
| 67SOL | HW2 | 235 | 3.060 | 1.382 | 1.981  | 0.9053  | -0.2446 | -0.4998 |
| 68SOL | OW  | 236 | 0.822 | 2.348 | 0.988  | -0.2874 | -0.8003 | 0.0030  |
| 68SOL | HW1 | 237 | 0.885 | 2.424 | 1.002  | 0.6989  | -1.3164 | -1.3644 |
| 68SOL | HW2 | 238 | 0.761 | 2.340 | 1.066  | 0.2972  | 0.7172  | 0.6477  |
| 69SOL | OW  | 239 | 2.266 | 0.464 | 1.887  | -0.1740 | 0.1357  | -0.1800 |
| 69SOL | HW1 | 240 | 2.189 | 0.527 | 1.901  | 0.3760  | 0.6171  | 0.8035  |
| 69SOL | HW2 | 241 | 2.320 | 0.495 | 1.808  | -1.2449 | -0.4972 | -1.2048 |
| 70SOL | OW  | 242 | 0.600 | 1.550 | 1.374  | -0.2141 | 0.4514  | -0.5861 |
| 70SOL | HW1 | 243 | 0.568 | 1.547 | 1.279  | -1.6336 | -0.5643 | -0.1076 |
| 70SOL | HW2 | 244 | 0.582 | 1.462 | 1.417  | -0.5063 | 1.2190  | 0.9065  |
| 71SOL | OW  | 245 | 2.031 | 1.566 | 0.071  | -0.0634 | 0.0690  | 0.6012  |
| 71SOL | HW1 | 246 | 2.051 | 1.472 | 0.096  | 1.2139  | 0.1084  | -0.1832 |
| 71SOL | HW2 | 247 | 2.045 | 1.579 | -0.027 | -1.5414 | 0.7634  | 0.4485  |
| 72SOL | OW  | 248 | 1.583 | 1.843 | 0.282  | 0.1193  | -0.1598 | 0.3961  |
| 72SOL | HW1 | 249 | 1.643 | 1.795 | 0.345  | 0.5048  | 1.7294  | 1.5540  |
| 72SOL | HW2 | 250 | 1.488 | 1.831 | 0.309  | 0.1360  | -1.0559 | 0.0793  |
| 73SOL | OW  | 251 | 1.834 | 1.697 | 0.861  | 0.2430  | 0.1663  | 0.3684  |
| 73SOL | HW1 | 252 | 1.740 | 1.712 | 0.830  | 0.3174  | 0.3668  | 0.2362  |
| 73SOL | HW2 | 253 | 1.890 | 1.669 | 0.783  | 0.3082  | 0.1109  | 0.4352  |
| 74SOL | OW  | 254 | 0.804 | 1.843 | 2.077  | 0.1811  | 0.2308  | 0.1068  |
| 74SOL | HW1 | 255 | 0.708 | 1.813 | 2.082  | -0.3759 | 1.7582  | -0.7396 |
| 74SOL | HW2 | 256 | 0.826 | 1.895 | 2.160  | -0.1583 | 1.0157  | -0.2804 |
| 75SOL | OW  | 257 | 0.332 | 1.778 | 0.612  | 0.2879  | -0.1634 | 0.2097  |
| 75SOL | HW1 | 258 | 0.390 | 1.771 | 0.693  | 0.2958  | 1.7028  | 0.4129  |
| 75SOL | HW2 | 259 | 0.252 | 1.718 | 0.623  | 1.1880  | -1.2991 | 0.7669  |
| 76SOL | OW  | 260 | 0.413 | 1.325 | 2.083  | 0.2500  | -0.5194 | 0.0058  |
| 76SOL | HW1 | 261 | 0.429 | 1.282 | 2.172  | -3.2282 | -1.7729 | 0.1612  |
| 76SOL | HW2 | 262 | 0.350 | 1.268 | 2.030  | 0.1127  | 1.5565  | -2.1869 |
| 77SOL | OW  | 263 | 0.884 | 0.319 | 2.185  | -0.3170 | 0.0810  | -0.7959 |
| 77SOL | HW1 | 264 | 0.830 | 0.299 | 2.103  | 0.4103  | 1.2115  | -1.5743 |
| 77SOL | HW2 | 265 | 0.834 | 0.382 | 2.244  | -0.1685 | 0.5281  | -1.1474 |
| 78SOL | OW  | 266 | 1.528 | 0.971 | 1.363  | -0.2575 | 0.4312  | 0.0689  |
| 78SOL | HW1 | 267 | 1.620 | 1.006 | 1.380  | -0.1280 | 0.6461  | -0.9997 |
| 78SOL | HW2 | 268 | 1.531 | 0.871 | 1.365  | -0.1796 | 0.4389  | 0.8675  |
| 79SOL | OW  | 269 | 0.325 | 0.956 | 2.108  | 0.3013  | -0.0356 | -0.5274 |
| 79SOL | HW1 | 270 | 0.232 | 0.920 | 2.102  | -0.0660 | 0.5453  | 1.2785  |
| 79SOL | HW2 | 271 | 0.336 | 1.028 | 2.039  | -0.6771 | 0.1061  | -0.5571 |
| 80SOL | OW  | 272 | 3.059 | 0.470 | 0.745  | -0.3903 | -0.1427 | 0.0585  |
| 80SOL | HW1 | 273 | 3.108 | 0.550 | 0.778  | 0.0866  | 0.0131  | -0.9962 |
| 80SOL | HW2 | 274 | 2.961 | 0.490 | 0.742  | -0.2517 | 0.4815  | -0.4307 |
| 81SOL | OW  | 275 | 0.252 | 0.407 | 0.574  | -0.7413 | -0.9980 | -0.6221 |
| 81SOL | HW1 | 276 | 0.326 | 0.432 | 0.636  | -2.8413 | -0.2615 | 1.7957  |
| 81SOL | HW2 | 277 | 0.241 | 0.307 | 0.575  | -0.0616 | -1.0764 | -0.6518 |
| 82SOL | OW  | 278 | 2.515 | 0.081 | 2.040  | 0.0167  | -0.3333 | 0.1291  |
| 82SOL | HW1 | 279 | 2.454 | 0.099 | 1.963  | -0.3046 | -0.3765 | 0.3726  |
| 82SOL | HW2 | 280 | 2.574 | 0.160 | 2.055  | 2.0348  | -1.3552 | -1.9296 |
| 83SOL | OW  | 281 | 0.474 | 3.060 | 0.209  | -0.1551 | -0.0032 | -0.3193 |

|        |     |     |       |       |       |         |         |         |
|--------|-----|-----|-------|-------|-------|---------|---------|---------|
| 83SOL  | HW1 | 282 | 0.507 | 3.146 | 0.169 | 1.7486  | -0.2068 | 0.7197  |
| 83SOL  | HW2 | 283 | 0.394 | 3.028 | 0.158 | -0.7610 | 2.2479  | -0.8785 |
| 84SOL  | OW  | 284 | 1.263 | 2.733 | 1.627 | -0.0730 | -0.1664 | -0.1815 |
| 84SOL  | HW1 | 285 | 1.287 | 2.797 | 1.700 | -1.2732 | -0.5906 | 0.6150  |
| 84SOL  | HW2 | 286 | 1.261 | 2.640 | 1.665 | 0.5932  | -0.5585 | -1.0773 |
| 85SOL  | OW  | 287 | 1.834 | 2.497 | 1.409 | 0.6072  | 0.3278  | -0.4952 |
| 85SOL  | HW1 | 288 | 1.847 | 2.410 | 1.458 | -1.3951 | 0.3602  | 0.1958  |
| 85SOL  | HW2 | 289 | 1.875 | 2.571 | 1.462 | 0.7429  | 0.0180  | -0.1612 |
| 86SOL  | OW  | 290 | 0.739 | 2.625 | 0.940 | 0.1314  | -0.4335 | 0.0948  |
| 86SOL  | HW1 | 291 | 0.714 | 2.536 | 0.978 | -1.8121 | 0.2031  | 0.4270  |
| 86SOL  | HW2 | 292 | 0.734 | 2.694 | 1.012 | 0.0235  | 0.1999  | -0.5113 |
| 87SOL  | OW  | 293 | 1.540 | 0.175 | 0.032 | -0.0215 | -0.2792 | -0.0033 |
| 87SOL  | HW1 | 294 | 1.566 | 0.128 | 0.116 | -0.0866 | 1.4925  | 1.0701  |
| 87SOL  | HW2 | 295 | 1.442 | 0.163 | 0.016 | 0.0035  | -0.6798 | 0.1438  |
| 88SOL  | OW  | 296 | 1.335 | 1.098 | 0.636 | 0.0908  | 0.3846  | 0.5000  |
| 88SOL  | HW1 | 297 | 1.431 | 1.109 | 0.659 | 0.1447  | 3.3800  | -0.6715 |
| 88SOL  | HW2 | 298 | 1.326 | 1.034 | 0.559 | 1.3576  | 1.4313  | -0.5516 |
| 89SOL  | OW  | 299 | 0.572 | 2.182 | 1.809 | 0.0196  | -0.5783 | -0.1811 |
| 89SOL  | HW1 | 300 | 0.580 | 2.084 | 1.829 | -0.0688 | -0.4246 | 0.6183  |
| 89SOL  | HW2 | 301 | 0.653 | 2.229 | 1.844 | -0.5750 | -0.1703 | 0.6620  |
| 90SOL  | OW  | 302 | 2.015 | 2.772 | 0.101 | -0.4118 | -0.1029 | 0.0908  |
| 90SOL  | HW1 | 303 | 1.970 | 2.684 | 0.115 | -1.6966 | 0.6537  | 0.9406  |
| 90SOL  | HW2 | 304 | 2.001 | 2.829 | 0.182 | -0.3144 | 1.1935  | -0.7856 |
| 91SOL  | OW  | 305 | 2.049 | 1.922 | 0.984 | -0.5248 | 0.4413  | 0.2610  |
| 91SOL  | HW1 | 306 | 1.952 | 1.919 | 1.008 | -0.3090 | 0.0595  | 1.1364  |
| 91SOL  | HW2 | 307 | 2.059 | 1.933 | 0.886 | -1.4593 | -0.8526 | -0.0032 |
| 92SOL  | OW  | 308 | 2.993 | 2.294 | 0.606 | 0.7138  | 0.0365  | -0.3594 |
| 92SOL  | HW1 | 309 | 2.900 | 2.329 | 0.600 | 0.4796  | 0.5089  | 3.4353  |
| 92SOL  | HW2 | 310 | 2.992 | 2.195 | 0.593 | -0.3179 | 0.0283  | -0.3144 |
| 93SOL  | OW  | 311 | 1.921 | 1.999 | 0.310 | 0.2570  | 0.1832  | -0.0714 |
| 93SOL  | HW1 | 312 | 1.921 | 2.028 | 0.214 | -0.2113 | -0.6034 | -0.3237 |
| 93SOL  | HW2 | 313 | 1.873 | 1.911 | 0.317 | 1.4509  | -0.4217 | 0.6857  |
| 94SOL  | OW  | 314 | 2.336 | 2.880 | 0.304 | 0.7228  | 0.0424  | -0.6763 |
| 94SOL  | HW1 | 315 | 2.365 | 2.851 | 0.213 | 1.1508  | -2.2468 | 0.1202  |
| 94SOL  | HW2 | 316 | 2.398 | 2.841 | 0.373 | -0.9662 | -0.3143 | 0.7327  |
| 95SOL  | OW  | 317 | 2.791 | 0.456 | 1.931 | -1.0276 | -0.2020 | -0.2198 |
| 95SOL  | HW1 | 318 | 2.758 | 0.410 | 2.013 | -1.0648 | 1.9795  | 1.0589  |
| 95SOL  | HW2 | 319 | 2.753 | 0.549 | 1.927 | 0.9433  | 0.6167  | -1.3764 |
| 96SOL  | OW  | 320 | 2.706 | 0.343 | 1.712 | 0.3628  | 0.6089  | 0.7699  |
| 96SOL  | HW1 | 321 | 2.650 | 0.413 | 1.667 | -1.3551 | -0.6608 | 0.8388  |
| 96SOL  | HW2 | 322 | 2.741 | 0.379 | 1.798 | -0.0414 | 1.5602  | 0.5545  |
| 97SOL  | OW  | 323 | 0.899 | 2.352 | 0.119 | 0.2349  | 0.3366  | -0.2006 |
| 97SOL  | HW1 | 324 | 0.805 | 2.354 | 0.085 | 0.2432  | -3.0545 | -0.6944 |
| 97SOL  | HW2 | 325 | 0.899 | 2.335 | 0.217 | 0.3800  | 1.3164  | -0.0123 |
| 98SOL  | OW  | 326 | 0.379 | 2.856 | 0.852 | -0.1135 | -0.6686 | 0.1992  |
| 98SOL  | HW1 | 327 | 0.449 | 2.915 | 0.812 | -1.1867 | 0.0101  | -0.7314 |
| 98SOL  | HW2 | 328 | 0.351 | 2.787 | 0.784 | -1.0094 | -0.3409 | 0.2282  |
| 99SOL  | OW  | 329 | 0.422 | 0.286 | 2.058 | 0.0537  | 0.4214  | 0.5728  |
| 99SOL  | HW1 | 330 | 0.376 | 0.203 | 2.091 | -0.2776 | 0.2669  | -0.2513 |
| 99SOL  | HW2 | 331 | 0.388 | 0.365 | 2.108 | -0.6840 | 0.2383  | 0.3694  |
| 100SOL | OW  | 332 | 1.570 | 1.973 | 2.124 | 0.7524  | -0.7931 | 0.4487  |
| 100SOL | HW1 | 333 | 1.500 | 2.035 | 2.088 | -0.9326 | -2.1342 | 1.3126  |

|        |     |     |       |       |        |         |         |         |
|--------|-----|-----|-------|-------|--------|---------|---------|---------|
| 100SOL | HW2 | 334 | 1.601 | 1.912 | 2.051  | -0.8059 | -1.8233 | 0.6149  |
| 101SOL | OW  | 335 | 3.042 | 2.309 | 1.329  | 0.2272  | -0.1961 | -0.0558 |
| 101SOL | HW1 | 336 | 2.951 | 2.328 | 1.293  | -1.0003 | -2.8870 | 1.3554  |
| 101SOL | HW2 | 337 | 3.106 | 2.296 | 1.253  | -1.0794 | -0.5895 | -1.1198 |
| 102SOL | OW  | 338 | 2.528 | 0.886 | 2.069  | -0.6458 | -0.2486 | 0.1848  |
| 102SOL | HW1 | 339 | 2.544 | 0.874 | 2.167  | 0.4601  | -0.9051 | -0.0674 |
| 102SOL | HW2 | 340 | 2.579 | 0.818 | 2.018  | 0.9009  | 1.6970  | -1.0001 |
| 103SOL | OW  | 341 | 1.611 | 2.832 | 0.136  | 0.2805  | 0.4630  | 0.2275  |
| 103SOL | HW1 | 342 | 1.669 | 2.761 | 0.095  | 0.5030  | 0.3426  | 0.7513  |
| 103SOL | HW2 | 343 | 1.584 | 2.804 | 0.228  | 1.1665  | 1.5056  | 0.8163  |
| 104SOL | OW  | 344 | 2.051 | 3.140 | 0.023  | 0.0048  | 0.3020  | 0.5329  |
| 104SOL | HW1 | 345 | 2.000 | 3.165 | 0.106  | -0.2778 | 1.8070  | -0.0612 |
| 104SOL | HW2 | 346 | 2.021 | 3.050 | -0.008 | -1.7066 | 0.7722  | 0.6884  |
| 105SOL | OW  | 347 | 2.670 | 1.074 | 0.879  | -0.0104 | -0.3882 | -0.3267 |
| 105SOL | HW1 | 348 | 2.652 | 1.173 | 0.880  | 0.8065  | -0.2330 | 0.5131  |
| 105SOL | HW2 | 349 | 2.723 | 1.051 | 0.798  | -0.8166 | -0.2620 | -0.9008 |
| 106SOL | OW  | 350 | 1.973 | 0.460 | 1.221  | -0.0864 | 0.1120  | -0.1954 |
| 106SOL | HW1 | 351 | 2.042 | 0.507 | 1.276  | 0.2721  | 1.2817  | -1.5764 |
| 106SOL | HW2 | 352 | 2.005 | 0.453 | 1.126  | -1.0630 | -1.0509 | -0.4654 |
| 107SOL | OW  | 353 | 2.898 | 1.613 | 1.951  | 0.1354  | -0.2211 | -0.0200 |
| 107SOL | HW1 | 354 | 2.866 | 1.694 | 1.902  | -0.1457 | -1.9971 | -2.9526 |
| 107SOL | HW2 | 355 | 2.872 | 1.621 | 2.048  | -0.0560 | 3.0331  | -0.2355 |
| 108SOL | OW  | 356 | 2.269 | 2.779 | 0.024  | 0.2647  | -0.3631 | -0.0795 |
| 108SOL | HW1 | 357 | 2.262 | 2.727 | -0.061 | -1.6326 | -0.0471 | -0.1542 |
| 108SOL | HW2 | 358 | 2.189 | 2.762 | 0.081  | -0.1114 | 1.9542  | 0.1914  |
| 109SOL | OW  | 359 | 0.009 | 0.962 | 0.567  | 0.5902  | 0.3974  | 0.8546  |
| 109SOL | HW1 | 360 | 0.058 | 0.875 | 0.571  | -0.9895 | -0.4744 | 2.4984  |
| 109SOL | HW2 | 361 | 0.059 | 1.030 | 0.621  | 0.9356  | 0.0479  | 0.9811  |
| 110SOL | OW  | 362 | 1.450 | 2.964 | 0.700  | 0.6310  | -0.0604 | 0.2827  |
| 110SOL | HW1 | 363 | 1.433 | 2.892 | 0.632  | -1.9794 | 0.5159  | 0.2012  |
| 110SOL | HW2 | 364 | 1.459 | 2.922 | 0.790  | 0.6436  | -0.6108 | 0.0345  |
| 111SOL | OW  | 365 | 1.695 | 2.920 | 1.813  | 0.3829  | -0.4508 | 0.0817  |
| 111SOL | HW1 | 366 | 1.794 | 2.914 | 1.824  | 0.2119  | -0.4099 | 1.9561  |
| 111SOL | HW2 | 367 | 1.658 | 2.829 | 1.794  | 0.6770  | -0.6484 | 0.4384  |
| 112SOL | OW  | 368 | 1.628 | 0.369 | 0.210  | -0.6129 | -0.4214 | 0.1331  |
| 112SOL | HW1 | 369 | 1.585 | 0.335 | 0.127  | -0.4974 | -0.1816 | -0.0284 |
| 112SOL | HW2 | 370 | 1.721 | 0.335 | 0.216  | -0.9554 | -1.2660 | 0.6890  |
| 113SOL | OW  | 371 | 1.628 | 3.082 | 1.009  | 0.5485  | 0.5865  | 0.4367  |
| 113SOL | HW1 | 372 | 1.596 | 3.162 | 1.059  | 0.4196  | 1.2786  | -0.7045 |
| 113SOL | HW2 | 373 | 1.634 | 3.104 | 0.911  | -1.8854 | -1.5003 | -0.3077 |
| 114SOL | OW  | 374 | 0.227 | 1.539 | 1.981  | -0.0152 | 0.1647  | 0.5427  |
| 114SOL | HW1 | 375 | 0.264 | 1.490 | 2.060  | -0.1764 | -1.2376 | -0.2332 |
| 114SOL | HW2 | 376 | 0.137 | 1.503 | 1.959  | 1.6696  | -2.5086 | -2.8573 |
| 115SOL | OW  | 377 | 2.293 | 2.279 | 1.695  | 0.0172  | -0.3272 | 0.1305  |
| 115SOL | HW1 | 378 | 2.249 | 2.246 | 1.611  | 0.3946  | 1.7041  | -0.9174 |
| 115SOL | HW2 | 379 | 2.250 | 2.364 | 1.724  | 1.5063  | 0.2983  | 0.5916  |
| 116SOL | OW  | 380 | 2.918 | 0.354 | 1.088  | -0.0010 | 0.3189  | 0.5807  |
| 116SOL | HW1 | 381 | 2.896 | 0.292 | 1.012  | 0.1223  | 0.8160  | 0.1297  |
| 116SOL | HW2 | 382 | 3.000 | 0.407 | 1.065  | -0.0452 | 0.5744  | 1.0042  |
| 117SOL | OW  | 383 | 0.100 | 1.955 | 0.896  | -0.0149 | 0.1717  | -0.2680 |
| 117SOL | HW1 | 384 | 0.145 | 2.000 | 0.973  | -2.6277 | 1.3452  | 0.7013  |
| 117SOL | HW2 | 385 | 0.152 | 1.972 | 0.812  | 2.1048  | 0.1105  | 0.9738  |

|        |     |     |       |       |       |         |         |         |
|--------|-----|-----|-------|-------|-------|---------|---------|---------|
| 118SOL | OW  | 386 | 2.741 | 1.105 | 1.431 | -0.0258 | -0.0468 | -0.0069 |
| 118SOL | HW1 | 387 | 2.696 | 1.146 | 1.510 | 1.1277  | -0.7341 | 1.0304  |
| 118SOL | HW2 | 388 | 2.672 | 1.067 | 1.369 | -0.9368 | 0.5363  | 0.6309  |
| 119SOL | OW  | 389 | 2.596 | 1.626 | 1.578 | -0.1338 | 0.7552  | 0.2607  |
| 119SOL | HW1 | 390 | 2.546 | 1.684 | 1.514 | -1.9545 | -0.1741 | 0.7448  |
| 119SOL | HW2 | 391 | 2.693 | 1.626 | 1.556 | -0.3755 | 2.4077  | -0.9359 |
| 120SOL | OW  | 392 | 2.423 | 0.282 | 1.017 | -0.2992 | 0.2214  | -0.3448 |
| 120SOL | HW1 | 393 | 2.482 | 0.237 | 0.950 | -0.0852 | 0.2160  | -0.1539 |
| 120SOL | HW2 | 394 | 2.358 | 0.341 | 0.969 | 1.5552  | 2.3116  | -0.4832 |
| 121SOL | OW  | 395 | 1.729 | 0.586 | 1.174 | -0.3051 | -0.2996 | -0.4291 |
| 121SOL | HW1 | 396 | 1.790 | 0.530 | 1.229 | -1.5178 | -0.2904 | 0.9949  |
| 121SOL | HW2 | 397 | 1.749 | 0.683 | 1.190 | -1.4842 | -0.2621 | 1.0705  |
| 122SOL | OW  | 398 | 1.948 | 0.971 | 1.577 | 0.0474  | 0.7582  | 0.0883  |
| 122SOL | HW1 | 399 | 1.965 | 0.881 | 1.536 | 0.3708  | 1.3204  | -1.0514 |
| 122SOL | HW2 | 400 | 2.034 | 1.021 | 1.581 | -0.1442 | 1.0453  | 0.6732  |
| 123SOL | OW  | 401 | 0.259 | 2.316 | 0.500 | 0.3095  | 0.0164  | 0.2493  |
| 123SOL | HW1 | 402 | 0.180 | 2.290 | 0.555 | 0.3283  | 2.0238  | 1.3142  |
| 123SOL | HW2 | 403 | 0.228 | 2.342 | 0.408 | -0.2837 | 0.7459  | 0.6431  |
| 124SOL | OW  | 404 | 3.035 | 1.243 | 1.198 | -0.1162 | -0.0903 | 0.2266  |
| 124SOL | HW1 | 405 | 3.134 | 1.255 | 1.191 | -0.0382 | -0.7785 | 0.1003  |
| 124SOL | HW2 | 406 | 3.009 | 1.231 | 1.294 | -0.2926 | 1.7900  | 0.4537  |
| 125SOL | OW  | 407 | 3.041 | 1.761 | 0.712 | 0.3593  | -0.3574 | -0.5929 |
| 125SOL | HW1 | 408 | 3.018 | 1.758 | 0.615 | -0.3526 | 0.1708  | -0.4501 |
| 125SOL | HW2 | 409 | 3.038 | 1.856 | 0.744 | 2.6339  | -0.2554 | -0.5168 |
| 126SOL | OW  | 410 | 0.233 | 3.001 | 0.118 | -0.0442 | -0.1784 | -0.6008 |
| 126SOL | HW1 | 411 | 0.205 | 2.933 | 0.050 | -2.3986 | 0.3895  | -0.2907 |
| 126SOL | HW2 | 412 | 0.184 | 2.985 | 0.204 | 1.0312  | 0.6049  | 0.1937  |
| 127SOL | OW  | 413 | 0.315 | 1.152 | 1.060 | 0.4553  | -0.0910 | 0.4023  |
| 127SOL | HW1 | 414 | 0.275 | 1.064 | 1.088 | 0.4198  | 0.2450  | 1.4629  |
| 127SOL | HW2 | 415 | 0.355 | 1.143 | 0.969 | 0.7013  | -1.2943 | 0.6055  |
| 128SOL | OW  | 416 | 0.815 | 2.731 | 1.441 | 0.1745  | 0.1312  | 0.6963  |
| 128SOL | HW1 | 417 | 0.861 | 2.818 | 1.425 | 0.9793  | -0.4331 | -0.1648 |
| 128SOL | HW2 | 418 | 0.870 | 2.675 | 1.503 | -0.5119 | 0.3444  | 1.5367  |
| 129SOL | OW  | 419 | 0.695 | 0.999 | 1.170 | -0.7356 | 0.0484  | -0.1264 |
| 129SOL | HW1 | 420 | 0.787 | 1.026 | 1.198 | -1.0317 | 0.4998  | 0.4298  |
| 129SOL | HW2 | 421 | 0.683 | 0.901 | 1.185 | -1.0795 | 0.3735  | 1.9347  |
| 130SOL | OW  | 422 | 1.620 | 2.287 | 2.139 | 0.6381  | -0.3946 | 0.1885  |
| 130SOL | HW1 | 423 | 1.630 | 2.360 | 2.206 | -0.4846 | 0.4040  | -0.4792 |
| 130SOL | HW2 | 424 | 1.691 | 2.218 | 2.153 | 2.0370  | 1.0640  | 0.5107  |
| 131SOL | OW  | 425 | 2.941 | 1.686 | 0.972 | -0.0068 | 0.6269  | -0.3112 |
| 131SOL | HW1 | 426 | 3.007 | 1.695 | 0.898 | 0.4650  | 2.3162  | 0.2646  |
| 131SOL | HW2 | 427 | 2.857 | 1.734 | 0.947 | -0.4552 | -0.1882 | -0.3997 |
| 132SOL | OW  | 428 | 2.602 | 0.072 | 1.270 | 0.3061  | 0.8115  | 0.1112  |
| 132SOL | HW1 | 429 | 2.697 | 0.102 | 1.275 | -0.2187 | 2.7196  | -0.3333 |
| 132SOL | HW2 | 430 | 2.588 | 0.020 | 1.186 | 1.0960  | -0.1533 | 0.5512  |
| 133SOL | OW  | 431 | 0.864 | 1.597 | 0.873 | 0.1318  | 0.2437  | -0.1198 |
| 133SOL | HW1 | 432 | 0.949 | 1.615 | 0.825 | -0.8801 | 0.4699  | -1.9327 |
| 133SOL | HW2 | 433 | 0.830 | 1.681 | 0.916 | 0.9769  | 0.0693  | 0.9284  |
| 134SOL | OW  | 434 | 3.017 | 3.058 | 0.209 | -0.9196 | 0.2335  | 0.4375  |
| 134SOL | HW1 | 435 | 2.977 | 3.121 | 0.142 | -2.0252 | 0.7661  | 1.5660  |
| 134SOL | HW2 | 436 | 2.964 | 2.973 | 0.212 | 0.2371  | -0.5614 | -0.6756 |
| 135SOL | OW  | 437 | 3.095 | 2.013 | 0.531 | -0.1631 | -0.0495 | 0.4511  |

|        |     |     |       |       |       |         |         |         |
|--------|-----|-----|-------|-------|-------|---------|---------|---------|
| 135SOL | HW1 | 438 | 3.053 | 1.927 | 0.500 | -2.6877 | 0.8124  | 1.2368  |
| 135SOL | HW2 | 439 | 3.191 | 1.996 | 0.555 | -1.0220 | -3.1141 | 2.2905  |
| 136SOL | OW  | 440 | 0.730 | 2.586 | 1.888 | -0.2087 | 0.1725  | -0.2447 |
| 136SOL | HW1 | 441 | 0.721 | 2.525 | 1.966 | 1.5055  | 0.4488  | 0.2150  |
| 136SOL | HW2 | 442 | 0.640 | 2.626 | 1.866 | -0.8631 | -0.5087 | 1.0694  |
| 137SOL | OW  | 443 | 2.336 | 1.294 | 0.641 | 0.4745  | 0.1690  | -0.0845 |
| 137SOL | HW1 | 444 | 2.264 | 1.305 | 0.709 | 0.0367  | 2.7972  | -0.8462 |
| 137SOL | HW2 | 445 | 2.357 | 1.383 | 0.600 | 0.2241  | -1.3197 | -3.8915 |
| 138SOL | OW  | 446 | 1.004 | 1.184 | 0.211 | 0.1241  | -0.3551 | -0.1997 |
| 138SOL | HW1 | 447 | 1.058 | 1.238 | 0.276 | -1.1544 | -0.2204 | 0.7986  |
| 138SOL | HW2 | 448 | 0.907 | 1.204 | 0.225 | -0.1704 | -0.0641 | -2.4267 |
| 139SOL | OW  | 449 | 1.144 | 1.829 | 1.117 | 0.3228  | -0.3363 | 0.1287  |
| 139SOL | HW1 | 450 | 1.145 | 1.897 | 1.191 | 0.6448  | -0.2515 | 0.0499  |
| 139SOL | HW2 | 451 | 1.144 | 1.875 | 1.029 | 2.1983  | -0.3984 | 0.0448  |
| 140SOL | OW  | 452 | 1.552 | 0.219 | 0.633 | -0.3774 | -0.5527 | 0.3509  |
| 140SOL | HW1 | 453 | 1.572 | 0.307 | 0.589 | -1.3416 | -0.3354 | 0.3311  |
| 140SOL | HW2 | 454 | 1.494 | 0.164 | 0.572 | -0.0236 | -1.0833 | 0.4870  |
| 141SOL | OW  | 455 | 0.808 | 1.852 | 1.008 | 0.0169  | 0.1040  | -0.0959 |
| 141SOL | HW1 | 456 | 0.724 | 1.900 | 0.983 | -0.2552 | -0.4450 | -0.2578 |
| 141SOL | HW2 | 457 | 0.796 | 1.806 | 1.096 | 0.5884  | 1.0832  | 0.5077  |
| 142SOL | OW  | 458 | 0.459 | 2.174 | 0.704 | 0.0230  | 0.4199  | 0.1148  |
| 142SOL | HW1 | 459 | 0.547 | 2.206 | 0.669 | 0.5233  | -0.0004 | 0.9440  |
| 142SOL | HW2 | 460 | 0.409 | 2.250 | 0.744 | 0.3838  | 0.5094  | 0.4011  |
| 143SOL | OW  | 461 | 2.252 | 1.321 | 0.332 | -0.1169 | -0.0298 | 0.0896  |
| 143SOL | HW1 | 462 | 2.304 | 1.406 | 0.336 | -1.3553 | 0.7260  | 0.6706  |
| 143SOL | HW2 | 463 | 2.183 | 1.328 | 0.260 | -0.4839 | -0.3984 | 0.4050  |
| 144SOL | OW  | 464 | 2.708 | 2.898 | 0.842 | -0.1298 | -0.1212 | 0.0728  |
| 144SOL | HW1 | 465 | 2.776 | 2.947 | 0.896 | -1.4713 | 0.2228  | 1.5417  |
| 144SOL | HW2 | 466 | 2.744 | 2.881 | 0.750 | 2.3880  | -1.0820 | 1.1565  |
| 145SOL | OW  | 467 | 1.712 | 1.437 | 0.943 | 0.0429  | -0.3787 | -0.2061 |
| 145SOL | HW1 | 468 | 1.615 | 1.439 | 0.970 | -0.5994 | 0.9536  | -2.3378 |
| 145SOL | HW2 | 469 | 1.736 | 1.525 | 0.901 | 1.9147  | -1.0711 | -0.6737 |
| 146SOL | OW  | 470 | 1.892 | 2.311 | 1.646 | 0.2967  | 0.9378  | 0.2315  |
| 146SOL | HW1 | 471 | 1.862 | 2.265 | 1.729 | 0.8948  | 1.1076  | 0.5402  |
| 146SOL | HW2 | 472 | 1.965 | 2.376 | 1.667 | 0.7967  | 0.6248  | -0.4979 |
| 147SOL | OW  | 473 | 2.573 | 0.924 | 0.520 | 0.2189  | -0.0523 | -0.0613 |
| 147SOL | HW1 | 474 | 2.478 | 0.935 | 0.489 | 0.4613  | 0.1056  | -0.7800 |
| 147SOL | HW2 | 475 | 2.615 | 1.014 | 0.530 | 0.5910  | -0.1479 | -0.7244 |
| 148SOL | OW  | 476 | 0.294 | 2.217 | 1.749 | -0.2952 | 0.6305  | 0.3790  |
| 148SOL | HW1 | 477 | 0.293 | 2.188 | 1.653 | -2.9065 | -0.0679 | 0.5558  |
| 148SOL | HW2 | 478 | 0.385 | 2.200 | 1.788 | 0.8495  | 0.9915  | -1.9444 |
| 149SOL | OW  | 479 | 2.144 | 0.496 | 0.180 | 0.2738  | -0.4537 | 0.1073  |
| 149SOL | HW1 | 480 | 2.158 | 0.553 | 0.260 | 1.7670  | -0.6087 | -0.0230 |
| 149SOL | HW2 | 481 | 2.232 | 0.463 | 0.146 | -0.5350 | -2.8732 | 0.2026  |
| 150SOL | OW  | 482 | 2.723 | 1.809 | 0.883 | 0.2692  | 0.2247  | -0.2634 |
| 150SOL | HW1 | 483 | 2.652 | 1.835 | 0.947 | -0.5772 | -1.4262 | -0.4943 |
| 150SOL | HW2 | 484 | 2.731 | 1.880 | 0.812 | -1.6166 | 0.1292  | -0.6229 |
| 151SOL | OW  | 485 | 1.196 | 2.641 | 0.808 | -0.1827 | -0.5643 | 0.0626  |
| 151SOL | HW1 | 486 | 1.252 | 2.657 | 0.889 | -0.2270 | 0.4800  | -0.0886 |
| 151SOL | HW2 | 487 | 1.254 | 2.641 | 0.727 | -0.2356 | -0.7715 | 0.0262  |
| 152SOL | OW  | 488 | 0.534 | 1.803 | 1.120 | 0.1122  | 1.3430  | 0.5838  |
| 152SOL | HW1 | 489 | 0.501 | 1.884 | 1.168 | 1.8623  | 1.4385  | 1.7259  |

|        |     |     |       |        |        |         |         |         |
|--------|-----|-----|-------|--------|--------|---------|---------|---------|
| 152SOL | HW2 | 490 | 0.565 | 1.734  | 1.186  | -0.9573 | -0.1243 | -0.3706 |
| 153SOL | OW  | 491 | 2.787 | 0.516  | 0.774  | 0.2695  | 0.1581  | 0.8017  |
| 153SOL | HW1 | 492 | 2.707 | 0.505  | 0.832  | -0.2286 | 1.1083  | 0.3180  |
| 153SOL | HW2 | 493 | 2.788 | 0.608  | 0.736  | 0.6070  | -0.4211 | -0.6645 |
| 154SOL | OW  | 494 | 2.508 | 1.632  | 1.054  | 0.1420  | -0.2411 | -0.3527 |
| 154SOL | HW1 | 495 | 2.538 | 1.586  | 0.970  | -0.6418 | -2.3723 | 0.4892  |
| 154SOL | HW2 | 496 | 2.583 | 1.634  | 1.119  | 0.4794  | 0.6168  | -0.7509 |
| 155SOL | OW  | 497 | 2.407 | 2.646  | 1.673  | 0.3502  | -0.4464 | -0.6826 |
| 155SOL | HW1 | 498 | 2.411 | 2.581  | 1.596  | -0.5730 | 0.2562  | -1.3402 |
| 155SOL | HW2 | 499 | 2.364 | 2.731  | 1.643  | -0.1966 | -0.2228 | 0.6713  |
| 156SOL | OW  | 500 | 2.390 | 0.970  | 0.032  | -0.6006 | 0.6508  | -0.1921 |
| 156SOL | HW1 | 501 | 2.343 | 0.899  | -0.020 | 2.5411  | -1.3252 | -0.6212 |
| 156SOL | HW2 | 502 | 2.370 | 0.959  | 0.129  | -1.4914 | 0.2736  | -0.4100 |
| 157SOL | OW  | 503 | 0.843 | 1.338  | 0.827  | 0.1149  | -0.0778 | -0.4484 |
| 157SOL | HW1 | 504 | 0.825 | 1.436  | 0.842  | 1.2404  | -0.0462 | 0.9020  |
| 157SOL | HW2 | 505 | 0.855 | 1.321  | 0.730  | -0.8062 | 0.9954  | -0.7724 |
| 158SOL | OW  | 506 | 1.122 | 0.922  | -0.017 | -0.2736 | 0.2359  | -0.0913 |
| 158SOL | HW1 | 507 | 1.088 | 0.910  | 0.077  | -0.0499 | 0.6670  | 0.0486  |
| 158SOL | HW2 | 508 | 1.222 | 0.929  | -0.014 | -0.0948 | -1.5599 | -0.5455 |
| 159SOL | OW  | 509 | 0.476 | 1.125  | 1.286  | -0.1535 | -0.0635 | 0.5756  |
| 159SOL | HW1 | 510 | 0.547 | 1.076  | 1.237  | -1.2870 | -4.8828 | 3.1508  |
| 159SOL | HW2 | 511 | 0.406 | 1.157  | 1.221  | 2.1534  | 1.0785  | -1.5169 |
| 160SOL | OW  | 512 | 1.550 | 2.851  | 0.430  | -0.1212 | 0.3277  | 0.3427  |
| 160SOL | HW1 | 513 | 1.546 | 2.752  | 0.417  | 0.4654  | 0.2397  | 0.7521  |
| 160SOL | HW2 | 514 | 1.627 | 2.873  | 0.491  | 0.3918  | 1.1152  | -0.5610 |
| 161SOL | OW  | 515 | 1.044 | 0.112  | 1.820  | -0.3316 | 0.0168  | -0.2072 |
| 161SOL | HW1 | 516 | 1.091 | 0.199  | 1.833  | -0.9744 | 0.5572  | -1.3841 |
| 161SOL | HW2 | 517 | 0.953 | 0.128  | 1.780  | -0.0961 | -1.2404 | -1.3256 |
| 162SOL | OW  | 518 | 1.759 | 1.974  | 0.591  | -0.2845 | -0.4517 | 0.1732  |
| 162SOL | HW1 | 519 | 1.725 | 2.043  | 0.527  | -1.0345 | -0.0844 | 0.9523  |
| 162SOL | HW2 | 520 | 1.726 | 1.995  | 0.683  | 1.0730  | -0.7713 | 0.7497  |
| 163SOL | OW  | 521 | 0.476 | 0.462  | 0.730  | 0.0059  | -0.8331 | 0.4541  |
| 163SOL | HW1 | 522 | 0.439 | 0.454  | 0.823  | -0.1011 | -0.7294 | 0.4192  |
| 163SOL | HW2 | 523 | 0.548 | 0.393  | 0.718  | -1.5422 | -2.4315 | -0.1400 |
| 164SOL | OW  | 524 | 0.738 | 0.060  | 1.806  | 0.0092  | 0.4053  | -0.3043 |
| 164SOL | HW1 | 525 | 0.778 | -0.028 | 1.832  | 1.1530  | 0.9668  | -0.0734 |
| 164SOL | HW2 | 526 | 0.687 | 0.049  | 1.720  | 1.4926  | -0.1652 | -1.1599 |
| 165SOL | OW  | 527 | 0.559 | 3.096  | 0.927  | -0.1949 | 0.4252  | -0.3469 |
| 165SOL | HW1 | 528 | 0.572 | 3.073  | 1.024  | -0.1168 | -1.2793 | -0.7465 |
| 165SOL | HW2 | 529 | 0.646 | 3.126  | 0.888  | -0.1329 | 0.6934  | -0.0161 |
| 166SOL | OW  | 530 | 1.903 | 1.329  | 1.885  | -0.2162 | -0.0640 | -0.2650 |
| 166SOL | HW1 | 531 | 1.936 | 1.238  | 1.861  | -2.3028 | -1.1526 | 0.7969  |
| 166SOL | HW2 | 532 | 1.957 | 1.365  | 1.961  | -0.8661 | -1.4809 | 0.9281  |
| 167SOL | OW  | 533 | 1.438 | 2.684  | 2.188  | -0.4141 | -0.2633 | -0.2162 |
| 167SOL | HW1 | 534 | 1.438 | 2.721  | 2.095  | -0.3967 | 0.0235  | -0.1045 |
| 167SOL | HW2 | 535 | 1.441 | 2.760  | 2.253  | 0.8382  | -0.4889 | 0.0155  |
| 168SOL | OW  | 536 | 1.816 | 1.165  | 0.846  | 0.7363  | -0.2451 | 0.1817  |
| 168SOL | HW1 | 537 | 1.868 | 1.121  | 0.919  | -0.2172 | -1.1851 | 0.3126  |
| 168SOL | HW2 | 538 | 1.794 | 1.259  | 0.873  | 0.9256  | -0.3840 | 0.8346  |
| 169SOL | OW  | 539 | 2.465 | 1.860  | 2.036  | 0.0111  | 0.2238  | -0.7682 |
| 169SOL | HW1 | 540 | 2.519 | 1.813  | 1.966  | -0.2635 | 1.1826  | -1.6477 |
| 169SOL | HW2 | 541 | 2.491 | 1.957  | 2.038  | -2.2998 | 0.9322  | -1.8709 |

|        |     |     |       |       |       |         |         |         |
|--------|-----|-----|-------|-------|-------|---------|---------|---------|
| 170SOL | OW  | 542 | 2.368 | 0.970 | 0.808 | -0.3269 | 0.3186  | 0.0423  |
| 170SOL | HW1 | 543 | 2.426 | 1.038 | 0.855 | -0.6266 | 1.1327  | -0.7296 |
| 170SOL | HW2 | 544 | 2.275 | 1.006 | 0.802 | -0.6956 | -0.5576 | 0.3949  |
| 171SOL | OW  | 545 | 1.137 | 1.423 | 0.237 | 0.0973  | -0.6171 | 0.2693  |
| 171SOL | HW1 | 546 | 1.231 | 1.419 | 0.202 | 0.1172  | 0.6381  | 0.1296  |
| 171SOL | HW2 | 547 | 1.073 | 1.404 | 0.163 | 0.1689  | 1.1896  | -0.2915 |
| 172SOL | OW  | 548 | 0.807 | 1.697 | 1.266 | -0.5358 | -0.7610 | 0.2290  |
| 172SOL | HW1 | 549 | 0.890 | 1.642 | 1.256 | -1.2483 | -1.6815 | -0.9034 |
| 172SOL | HW2 | 550 | 0.744 | 1.652 | 1.329 | 1.4322  | 2.0132  | 4.6519  |
| 173SOL | OW  | 551 | 1.081 | 1.088 | 0.732 | -0.3284 | -0.4753 | -0.2373 |
| 173SOL | HW1 | 552 | 1.168 | 1.095 | 0.683 | -0.2477 | -0.4219 | -0.0878 |
| 173SOL | HW2 | 553 | 1.098 | 1.060 | 0.827 | -0.5607 | -1.5814 | -0.5113 |
| 174SOL | OW  | 554 | 1.985 | 0.720 | 1.509 | -0.2333 | -0.5012 | 0.1500  |
| 174SOL | HW1 | 555 | 1.947 | 0.662 | 1.581 | 0.6382  | -1.8655 | -0.4619 |
| 174SOL | HW2 | 556 | 2.068 | 0.679 | 1.473 | 0.3199  | 1.0527  | -0.4357 |
| 175SOL | OW  | 557 | 2.259 | 1.557 | 1.231 | -0.4381 | -0.4399 | -0.1282 |
| 175SOL | HW1 | 558 | 2.224 | 1.615 | 1.157 | -3.1581 | -2.0322 | -0.1914 |
| 175SOL | HW2 | 559 | 2.356 | 1.539 | 1.214 | -0.3798 | 1.1761  | -1.9874 |
| 176SOL | OW  | 560 | 0.697 | 0.905 | 0.356 | -0.2951 | -0.2679 | -0.1084 |
| 176SOL | HW1 | 561 | 0.739 | 0.841 | 0.292 | -1.0387 | -1.6051 | 0.6792  |
| 176SOL | HW2 | 562 | 0.753 | 0.912 | 0.438 | -0.7442 | -0.7613 | 0.2499  |
| 177SOL | OW  | 563 | 0.686 | 0.281 | 1.415 | 0.2905  | -0.6608 | -0.0006 |
| 177SOL | HW1 | 564 | 0.714 | 0.377 | 1.423 | -0.2709 | -0.6352 | 2.2022  |
| 177SOL | HW2 | 565 | 0.765 | 0.226 | 1.386 | 1.0845  | 0.2263  | 0.3995  |
| 178SOL | OW  | 566 | 2.059 | 1.438 | 2.073 | 0.3610  | 0.2851  | -0.2433 |
| 178SOL | HW1 | 567 | 2.052 | 1.411 | 2.169 | -0.9840 | -1.9749 | -0.9064 |
| 178SOL | HW2 | 568 | 2.156 | 1.443 | 2.048 | 0.7844  | 1.8718  | 1.4010  |
| 179SOL | OW  | 569 | 2.516 | 1.442 | 1.313 | -0.0430 | -0.0296 | -0.3702 |
| 179SOL | HW1 | 570 | 2.495 | 1.365 | 1.254 | -2.9620 | 1.3476  | -1.3444 |
| 179SOL | HW2 | 571 | 2.486 | 1.422 | 1.406 | -2.6730 | 0.5018  | -1.0045 |
| 180SOL | OW  | 572 | 1.261 | 2.085 | 0.124 | -0.4218 | 0.5888  | -0.3138 |
| 180SOL | HW1 | 573 | 1.288 | 2.111 | 0.217 | -3.0564 | -0.0479 | 0.7189  |
| 180SOL | HW2 | 574 | 1.260 | 1.986 | 0.117 | -1.1010 | 0.6175  | -0.7065 |
| 181SOL | OW  | 575 | 0.353 | 0.055 | 1.657 | -0.8373 | 0.1109  | -0.5094 |
| 181SOL | HW1 | 576 | 0.314 | 0.098 | 1.575 | -0.0977 | 0.9598  | -0.4335 |
| 181SOL | HW2 | 577 | 0.348 | 0.119 | 1.734 | -0.3343 | -0.1836 | -0.2235 |
| 182SOL | OW  | 578 | 1.438 | 2.803 | 1.935 | 0.6779  | -0.1342 | 0.4570  |
| 182SOL | HW1 | 579 | 1.341 | 2.821 | 1.916 | 0.2641  | -1.4758 | 1.1408  |
| 182SOL | HW2 | 580 | 1.482 | 2.769 | 1.853 | 0.4790  | 0.1164  | 0.2425  |
| 183SOL | OW  | 581 | 1.410 | 1.232 | 0.336 | 0.6215  | 0.0440  | 0.1654  |
| 183SOL | HW1 | 582 | 1.406 | 1.288 | 0.253 | -0.4908 | -0.0046 | 0.1651  |
| 183SOL | HW2 | 583 | 1.393 | 1.136 | 0.314 | 2.4355  | -0.3191 | 0.1806  |
| 184SOL | OW  | 584 | 1.680 | 0.685 | 1.761 | 0.0644  | 0.1252  | 0.4511  |
| 184SOL | HW1 | 585 | 1.602 | 0.646 | 1.712 | -0.2526 | 1.5366  | -0.2144 |
| 184SOL | HW2 | 586 | 1.759 | 0.625 | 1.751 | 0.4072  | 0.9857  | -2.9578 |
| 185SOL | OW  | 587 | 1.338 | 1.793 | 0.408 | -0.5974 | 0.5135  | -0.1997 |
| 185SOL | HW1 | 588 | 1.285 | 1.729 | 0.464 | -0.3101 | 0.3530  | -0.1091 |
| 185SOL | HW2 | 589 | 1.323 | 1.886 | 0.442 | 0.6181  | 0.2984  | 1.0194  |
| 186SOL | OW  | 590 | 1.931 | 0.326 | 0.286 | 0.0135  | 0.1485  | 0.8700  |
| 186SOL | HW1 | 591 | 2.013 | 0.356 | 0.237 | -0.8257 | 1.9897  | 0.5322  |
| 186SOL | HW2 | 592 | 1.914 | 0.387 | 0.363 | -0.7914 | -0.4984 | 1.2185  |
| 187SOL | OW  | 593 | 2.028 | 1.926 | 0.711 | -0.1612 | 0.4192  | -0.2812 |



|        |     |     |       |       |       |         |         |         |
|--------|-----|-----|-------|-------|-------|---------|---------|---------|
| 187SOL | HW1 | 594 | 2.065 | 1.852 | 0.653 | -1.1488 | -0.9774 | 0.8027  |
| 187SOL | HW2 | 595 | 1.941 | 1.958 | 0.673 | 0.6237  | 1.5939  | -1.1631 |
| 188SOL | OW  | 596 | 0.326 | 0.966 | 0.524 | -0.2700 | -0.2783 | -0.2135 |
| 188SOL | HW1 | 597 | 0.359 | 1.046 | 0.473 | 0.7330  | 0.1598  | 1.0628  |
| 188SOL | HW2 | 598 | 0.241 | 0.934 | 0.483 | 0.9934  | -0.5985 | -2.7960 |
| 189SOL | OW  | 599 | 0.583 | 2.700 | 2.186 | -0.3531 | -0.1991 | -0.7019 |
| 189SOL | HW1 | 600 | 0.552 | 2.621 | 2.240 | -0.2281 | 0.5839  | 0.5517  |
| 189SOL | HW2 | 601 | 0.678 | 2.686 | 2.158 | 0.7766  | 0.8166  | 2.2277  |
| 190SOL | OW  | 602 | 0.382 | 2.448 | 1.350 | -0.6682 | -0.7693 | 0.8997  |
| 190SOL | HW1 | 603 | 0.349 | 2.525 | 1.404 | -0.6999 | -1.6785 | 2.2057  |
| 190SOL | HW2 | 604 | 0.429 | 2.382 | 1.409 | -0.5996 | -1.7409 | -0.1907 |
| 191SOL | OW  | 605 | 0.506 | 1.804 | 2.104 | -0.1578 | -0.2198 | 0.2531  |
| 191SOL | HW1 | 606 | 0.408 | 1.806 | 2.085 | -0.1121 | -3.4842 | -0.9462 |
| 191SOL | HW2 | 607 | 0.528 | 1.724 | 2.159 | 1.8724  | 0.4932  | 0.5863  |
| 192SOL | OW  | 608 | 0.833 | 1.055 | 0.869 | 0.5047  | -0.1707 | -0.8692 |
| 192SOL | HW1 | 609 | 0.913 | 1.015 | 0.914 | -0.7460 | 0.4542  | 2.1809  |
| 192SOL | HW2 | 610 | 0.851 | 1.151 | 0.848 | 0.3550  | 0.1630  | 0.4654  |
| 193SOL | OW  | 611 | 3.109 | 0.639 | 1.184 | -0.0656 | 0.4972  | 0.1054  |
| 193SOL | HW1 | 612 | 3.051 | 0.705 | 1.136 | 0.6556  | 0.8778  | -0.2606 |
| 193SOL | HW2 | 613 | 3.134 | 0.565 | 1.123 | 0.8541  | 0.9826  | -0.1267 |
| 194SOL | OW  | 614 | 3.000 | 1.394 | 0.458 | 0.2821  | -1.0208 | 0.1790  |
| 194SOL | HW1 | 615 | 3.042 | 1.427 | 0.542 | -1.5704 | -0.0934 | 0.7788  |
| 194SOL | HW2 | 616 | 2.992 | 1.469 | 0.393 | 0.3260  | -1.3900 | -0.2622 |
| 195SOL | OW  | 617 | 3.005 | 1.591 | 0.257 | -0.1752 | 0.4738  | 0.0325  |
| 195SOL | HW1 | 618 | 2.922 | 1.620 | 0.209 | -2.4436 | -3.0238 | 1.4280  |
| 195SOL | HW2 | 619 | 3.047 | 1.515 | 0.207 | 1.2102  | 1.0453  | 0.2873  |
| 196SOL | OW  | 620 | 1.096 | 1.992 | 1.730 | -0.2791 | -0.1300 | 0.3166  |
| 196SOL | HW1 | 621 | 1.089 | 1.922 | 1.659 | -1.5218 | 1.0340  | -0.7660 |
| 196SOL | HW2 | 622 | 1.055 | 2.077 | 1.697 | -3.3632 | -0.2419 | 3.3231  |
| 197SOL | OW  | 623 | 2.420 | 0.508 | 0.538 | -0.0226 | 0.1154  | -0.3790 |
| 197SOL | HW1 | 624 | 2.338 | 0.451 | 0.539 | 0.1941  | -0.2130 | -0.7916 |
| 197SOL | HW2 | 625 | 2.417 | 0.573 | 0.614 | -1.2929 | 0.9955  | -1.1479 |
| 198SOL | OW  | 626 | 0.815 | 0.114 | 0.452 | 0.3863  | -0.5504 | 0.3568  |
| 198SOL | HW1 | 627 | 0.738 | 0.160 | 0.408 | 0.7208  | -0.1177 | 0.2240  |
| 198SOL | HW2 | 628 | 0.901 | 0.157 | 0.424 | 0.6117  | -0.3135 | 1.3642  |
| 199SOL | OW  | 629 | 0.700 | 2.767 | 1.159 | -0.2630 | 0.2228  | -0.3905 |
| 199SOL | HW1 | 630 | 0.647 | 2.850 | 1.178 | 0.0910  | 0.2504  | 0.5062  |
| 199SOL | HW2 | 631 | 0.738 | 2.731 | 1.244 | -0.9914 | -1.2580 | -0.6573 |
| 200SOL | OW  | 632 | 0.901 | 2.314 | 0.722 | -0.0813 | 0.0363  | -0.0486 |
| 200SOL | HW1 | 633 | 0.876 | 2.319 | 0.819 | -2.4324 | -1.0536 | -0.5318 |
| 200SOL | HW2 | 634 | 0.843 | 2.376 | 0.669 | -0.4061 | -1.0734 | -1.0204 |
| 201SOL | OW  | 635 | 0.228 | 2.021 | 0.667 | 0.1189  | -0.1614 | 0.0162  |
| 201SOL | HW1 | 636 | 0.306 | 2.082 | 0.683 | 0.6466  | -1.1925 | 1.5993  |
| 201SOL | HW2 | 637 | 0.260 | 1.932 | 0.636 | -0.5166 | -0.2150 | -0.5075 |
| 202SOL | OW  | 638 | 0.325 | 2.354 | 0.817 | 0.7342  | -0.0069 | 0.4300  |
| 202SOL | HW1 | 639 | 0.301 | 2.366 | 0.914 | -0.6843 | 1.4323  | -0.0486 |
| 202SOL | HW2 | 640 | 0.241 | 2.347 | 0.764 | 1.5047  | -1.0751 | -0.6876 |
| 203SOL | OW  | 641 | 1.189 | 1.241 | 1.665 | 0.2979  | -0.1340 | 0.0415  |
| 203SOL | HW1 | 642 | 1.163 | 1.315 | 1.603 | 0.8846  | -0.4988 | -0.6527 |
| 203SOL | HW2 | 643 | 1.288 | 1.235 | 1.670 | 0.2819  | 0.3516  | 1.5965  |
| 204SOL | OW  | 644 | 2.206 | 0.102 | 0.485 | 0.0976  | 0.1601  | 1.0157  |
| 204SOL | HW1 | 645 | 2.274 | 0.076 | 0.554 | 0.2165  | 1.0571  | 1.2513  |

|        |     |     |       |       |       |         |         |         |
|--------|-----|-----|-------|-------|-------|---------|---------|---------|
| 204SOL | HW2 | 646 | 2.232 | 0.065 | 0.396 | 1.2990  | 1.1055  | 0.9508  |
| 205SOL | OW  | 647 | 2.874 | 1.028 | 0.672 | 0.4328  | 0.0137  | 0.0260  |
| 205SOL | HW1 | 648 | 2.806 | 1.060 | 0.606 | -1.5739 | -1.3147 | 1.3456  |
| 205SOL | HW2 | 649 | 2.963 | 1.020 | 0.627 | -0.7642 | -0.5276 | -2.4224 |
| 206SOL | OW  | 650 | 2.633 | 2.217 | 0.558 | 0.3929  | -0.2545 | 0.8051  |
| 206SOL | HW1 | 651 | 2.571 | 2.254 | 0.627 | 0.0797  | 0.3154  | 0.2273  |
| 206SOL | HW2 | 652 | 2.693 | 2.290 | 0.525 | 1.6036  | -0.8621 | 1.5820  |
| 207SOL | OW  | 653 | 2.563 | 0.928 | 1.287 | -0.0566 | 0.2329  | 0.7757  |
| 207SOL | HW1 | 654 | 2.469 | 0.962 | 1.291 | -0.1812 | 0.0420  | -0.2680 |
| 207SOL | HW2 | 655 | 2.565 | 0.832 | 1.316 | -0.0485 | 0.4660  | 1.5743  |
| 208SOL | OW  | 656 | 0.146 | 2.641 | 0.567 | 0.3154  | 0.2927  | -0.3191 |
| 208SOL | HW1 | 657 | 0.079 | 2.615 | 0.497 | -1.3296 | 0.9448  | 0.9427  |
| 208SOL | HW2 | 658 | 0.174 | 2.736 | 0.551 | 0.9352  | 0.0215  | -0.8455 |
| 209SOL | OW  | 659 | 1.227 | 1.810 | 0.146 | 0.1124  | -0.4938 | -0.2298 |
| 209SOL | HW1 | 660 | 1.272 | 1.744 | 0.085 | 0.6523  | -0.3542 | 0.0147  |
| 209SOL | HW2 | 661 | 1.255 | 1.793 | 0.240 | 2.6902  | 1.9382  | -0.4195 |
| 210SOL | OW  | 662 | 3.034 | 0.390 | 1.818 | -0.6264 | 0.1108  | -0.4944 |
| 210SOL | HW1 | 663 | 2.942 | 0.402 | 1.857 | -1.4317 | -0.3179 | -2.2062 |
| 210SOL | HW2 | 664 | 3.065 | 0.296 | 1.835 | -1.0393 | -0.1211 | -0.9925 |
| 211SOL | OW  | 665 | 0.305 | 1.515 | 1.352 | -0.0281 | 0.0548  | -0.0187 |
| 211SOL | HW1 | 666 | 0.370 | 1.499 | 1.277 | 0.1166  | 2.3693  | -0.4406 |
| 211SOL | HW2 | 667 | 0.345 | 1.578 | 1.418 | -1.5707 | 0.9784  | 0.0769  |
| 212SOL | OW  | 668 | 0.412 | 0.984 | 1.527 | 0.3537  | -0.2843 | 0.2181  |
| 212SOL | HW1 | 669 | 0.468 | 0.902 | 1.538 | 0.6402  | 0.0316  | 1.1987  |
| 212SOL | HW2 | 670 | 0.430 | 1.024 | 1.437 | -1.4029 | -2.4693 | -1.1992 |
| 213SOL | OW  | 671 | 3.066 | 2.505 | 0.426 | 0.1480  | 0.2693  | 0.2448  |
| 213SOL | HW1 | 672 | 3.038 | 2.503 | 0.330 | 1.1365  | -1.3651 | -0.0672 |
| 213SOL | HW2 | 673 | 3.049 | 2.415 | 0.467 | 2.6508  | -0.1101 | 0.6485  |
| 214SOL | OW  | 674 | 2.392 | 2.414 | 0.354 | -0.6496 | -0.7045 | 0.4895  |
| 214SOL | HW1 | 675 | 2.385 | 2.410 | 0.454 | 0.0135  | 2.1759  | 0.7395  |
| 214SOL | HW2 | 676 | 2.300 | 2.419 | 0.315 | -0.9074 | 0.8170  | 1.1965  |
| 215SOL | OW  | 677 | 2.844 | 1.998 | 2.141 | 0.5433  | 0.2961  | 0.2193  |
| 215SOL | HW1 | 678 | 2.889 | 2.060 | 2.076 | -1.8377 | 2.5783  | 0.6014  |
| 215SOL | HW2 | 679 | 2.804 | 2.051 | 2.216 | -0.0788 | -1.9179 | 1.5417  |
| 216SOL | OW  | 680 | 0.126 | 0.753 | 1.546 | -0.2727 | 0.1872  | 0.5281  |
| 216SOL | HW1 | 681 | 0.162 | 0.743 | 1.454 | -1.4774 | 0.9851  | -0.0581 |
| 216SOL | HW2 | 682 | 0.159 | 0.839 | 1.586 | 1.4969  | -0.8828 | 1.4626  |
| 217SOL | OW  | 683 | 0.371 | 2.634 | 0.275 | 0.1691  | -0.1767 | 0.1827  |
| 217SOL | HW1 | 684 | 0.375 | 2.639 | 0.374 | 0.2766  | -1.5618 | 0.2683  |
| 217SOL | HW2 | 685 | 0.296 | 2.573 | 0.248 | -1.1266 | 1.6800  | -0.6467 |
| 218SOL | OW  | 686 | 2.832 | 2.731 | 1.451 | 0.1139  | 0.3543  | 0.4843  |
| 218SOL | HW1 | 687 | 2.915 | 2.682 | 1.480 | -0.2678 | -0.4511 | 0.2520  |
| 218SOL | HW2 | 688 | 2.857 | 2.805 | 1.389 | 0.5920  | -0.4849 | -0.3422 |
| 219SOL | OW  | 689 | 1.359 | 2.907 | 0.050 | -0.3323 | -0.1369 | -0.2148 |
| 219SOL | HW1 | 690 | 1.336 | 2.986 | 0.107 | -0.5940 | -0.0795 | -0.3953 |
| 219SOL | HW2 | 691 | 1.456 | 2.887 | 0.058 | -0.7360 | -1.4873 | 1.9605  |
| 220SOL | OW  | 692 | 2.183 | 1.295 | 1.206 | -0.3045 | 0.2787  | -0.0121 |
| 220SOL | HW1 | 693 | 2.260 | 1.232 | 1.198 | -0.8578 | -0.2522 | -1.3006 |
| 220SOL | HW2 | 694 | 2.218 | 1.388 | 1.218 | 0.5327  | 0.0134  | -0.3057 |
| 221SOL | OW  | 695 | 0.301 | 2.869 | 0.578 | -0.5562 | 0.0080  | 0.9067  |
| 221SOL | HW1 | 696 | 0.394 | 2.902 | 0.560 | -0.2672 | -1.5782 | -0.7997 |
| 221SOL | HW2 | 697 | 0.249 | 2.940 | 0.625 | 1.2244  | 1.2978  | 1.0136  |

|        |     |     |       |        |        |         |         |         |
|--------|-----|-----|-------|--------|--------|---------|---------|---------|
| 222SOL | OW  | 698 | 1.115 | 2.285  | 1.634  | 0.3124  | -0.3583 | 0.3353  |
| 222SOL | HW1 | 699 | 1.141 | 2.368  | 1.683  | 1.8180  | -0.0938 | -0.8167 |
| 222SOL | HW2 | 700 | 1.179 | 2.269  | 1.558  | -1.3658 | -1.2484 | -0.9820 |
| 223SOL | OW  | 701 | 2.148 | 2.431  | 0.248  | 0.1614  | 0.1943  | -0.2213 |
| 223SOL | HW1 | 702 | 2.157 | 2.438  | 0.149  | -2.1181 | -0.9426 | -0.5811 |
| 223SOL | HW2 | 703 | 2.111 | 2.517  | 0.284  | 0.0981  | 0.2803  | -0.4913 |
| 224SOL | OW  | 704 | 1.136 | 2.236  | 0.597  | 0.0001  | -0.4408 | 0.0895  |
| 224SOL | HW1 | 705 | 1.040 | 2.236  | 0.625  | -0.6019 | 0.5044  | -1.8362 |
| 224SOL | HW2 | 706 | 1.190 | 2.285  | 0.666  | -0.8467 | -1.0827 | 1.2541  |
| 225SOL | OW  | 707 | 2.047 | 0.014  | 2.020  | 0.3653  | -0.4127 | -0.0673 |
| 225SOL | HW1 | 708 | 2.064 | 0.103  | 1.979  | -0.4143 | -0.2509 | -0.0613 |
| 225SOL | HW2 | 709 | 2.127 | -0.015 | 2.071  | 0.3534  | 0.6652  | 0.6097  |
| 226SOL | OW  | 710 | 1.925 | 0.582  | 1.709  | 0.1781  | 1.0038  | -0.5604 |
| 226SOL | HW1 | 711 | 1.936 | 0.483  | 1.704  | 0.7250  | 1.0095  | 0.2935  |
| 226SOL | HW2 | 712 | 1.997 | 0.620  | 1.766  | -0.4807 | 1.8070  | -0.2448 |
| 227SOL | OW  | 713 | 0.605 | 1.576  | 0.418  | 0.2740  | 0.3427  | 0.1074  |
| 227SOL | HW1 | 714 | 0.608 | 1.562  | 0.517  | 0.3934  | -3.6176 | -0.3083 |
| 227SOL | HW2 | 715 | 0.518 | 1.619  | 0.393  | -0.9367 | -1.0008 | 1.7594  |
| 228SOL | OW  | 716 | 2.416 | 2.901  | 0.788  | -0.3223 | -0.8790 | -0.4883 |
| 228SOL | HW1 | 717 | 2.504 | 2.873  | 0.826  | -0.3670 | -0.4120 | -0.0256 |
| 228SOL | HW2 | 718 | 2.385 | 2.833  | 0.722  | 1.7184  | 0.2695  | -2.7809 |
| 229SOL | OW  | 719 | 0.828 | 0.889  | 1.650  | -0.2629 | 0.1125  | 0.1288  |
| 229SOL | HW1 | 720 | 0.903 | 0.839  | 1.692  | -1.7210 | 0.1573  | 2.9783  |
| 229SOL | HW2 | 721 | 0.845 | 0.988  | 1.658  | -0.4334 | 0.1202  | 0.3890  |
| 230SOL | OW  | 722 | 1.139 | 0.561  | 1.520  | -0.0515 | 0.2470  | 0.1921  |
| 230SOL | HW1 | 723 | 1.079 | 0.536  | 1.596  | 0.0420  | -0.8969 | -0.0788 |
| 230SOL | HW2 | 724 | 1.125 | 0.657  | 1.496  | -1.0635 | 0.2620  | 0.7652  |
| 231SOL | OW  | 725 | 2.090 | 1.553  | 0.405  | -0.0682 | 0.8615  | -0.2699 |
| 231SOL | HW1 | 726 | 2.179 | 1.548  | 0.360  | 1.2690  | 0.4845  | 2.2069  |
| 231SOL | HW2 | 727 | 2.030 | 1.482  | 0.369  | 1.0609  | 0.3226  | -1.1473 |
| 232SOL | OW  | 728 | 1.826 | 1.736  | 1.332  | 0.0137  | -0.5426 | 0.4553  |
| 232SOL | HW1 | 729 | 1.900 | 1.721  | 1.397  | 0.1147  | 0.1742  | 0.5135  |
| 232SOL | HW2 | 730 | 1.809 | 1.652  | 1.281  | 1.3407  | -0.5226 | -0.0516 |
| 233SOL | OW  | 731 | 1.919 | 0.473  | 0.537  | 0.2216  | 0.5276  | 0.0946  |
| 233SOL | HW1 | 732 | 1.845 | 0.456  | 0.601  | 0.2489  | 1.1010  | 0.2773  |
| 233SOL | HW2 | 733 | 1.959 | 0.563  | 0.554  | -0.1818 | 0.9659  | -1.1202 |
| 234SOL | OW  | 734 | 0.155 | 1.342  | 1.173  | 0.3937  | 0.3749  | 0.3503  |
| 234SOL | HW1 | 735 | 0.189 | 1.370  | 1.262  | 0.0664  | 0.0641  | 0.5716  |
| 234SOL | HW2 | 736 | 0.227 | 1.294  | 1.123  | -0.1332 | -1.5522 | 1.3754  |
| 235SOL | OW  | 737 | 0.401 | 0.481  | 1.206  | 0.3151  | -0.3435 | 0.5345  |
| 235SOL | HW1 | 738 | 0.481 | 0.525  | 1.166  | -0.4867 | -0.3729 | -1.1914 |
| 235SOL | HW2 | 739 | 0.381 | 0.396  | 1.157  | -0.5874 | -0.4980 | 1.1356  |
| 236SOL | OW  | 740 | 1.632 | 3.119  | 0.225  | 0.4700  | 0.5102  | -0.2557 |
| 236SOL | HW1 | 741 | 1.654 | 3.022  | 0.214  | 1.6941  | 0.9983  | -2.7164 |
| 236SOL | HW2 | 742 | 1.569 | 3.130  | 0.303  | -0.5636 | -2.3485 | -0.5551 |
| 237SOL | OW  | 743 | 0.822 | 1.080  | 0.024  | 0.1477  | 0.5740  | 0.3641  |
| 237SOL | HW1 | 744 | 0.908 | 1.100  | 0.071  | 0.2485  | 0.3086  | 0.2906  |
| 237SOL | HW2 | 745 | 0.827 | 0.990  | -0.018 | -0.1952 | 0.5248  | 0.4262  |
| 238SOL | OW  | 746 | 1.717 | 1.424  | 1.714  | 0.3361  | -0.2533 | -0.9345 |
| 238SOL | HW1 | 747 | 1.700 | 1.521  | 1.694  | -0.3997 | 0.7082  | 3.3896  |
| 238SOL | HW2 | 748 | 1.808 | 1.414  | 1.754  | -0.6361 | -0.7684 | 1.2808  |
| 239SOL | OW  | 749 | 0.937 | 2.153  | 1.320  | 0.6893  | 0.3101  | 0.6566  |

|        |     |     |       |       |        |         |         |         |
|--------|-----|-----|-------|-------|--------|---------|---------|---------|
| 239SOL | HW1 | 750 | 1.022 | 2.131 | 1.370  | 0.5022  | -0.7132 | 0.5495  |
| 239SOL | HW2 | 751 | 0.955 | 2.151 | 1.222  | 0.2096  | -1.4894 | 0.5740  |
| 240SOL | OW  | 752 | 2.069 | 2.877 | 0.911  | -0.3524 | 0.2067  | 0.2751  |
| 240SOL | HW1 | 753 | 2.084 | 2.973 | 0.890  | -0.7547 | 0.4658  | 1.1083  |
| 240SOL | HW2 | 754 | 2.067 | 2.865 | 1.010  | 0.6542  | -0.8182 | 0.1920  |
| 241SOL | OW  | 755 | 0.434 | 2.809 | 0.051  | -0.1970 | 0.8423  | -0.3084 |
| 241SOL | HW1 | 756 | 0.482 | 2.738 | -0.001 | -0.8726 | -0.7145 | 1.0762  |
| 241SOL | HW2 | 757 | 0.403 | 2.770 | 0.138  | -1.4892 | 2.5805  | 0.0533  |
| 242SOL | OW  | 758 | 0.124 | 2.327 | 1.924  | -0.1631 | 0.1977  | -0.6692 |
| 242SOL | HW1 | 759 | 0.174 | 2.267 | 1.861  | -1.4370 | -2.2821 | 0.5552  |
| 242SOL | HW2 | 760 | 0.062 | 2.386 | 1.872  | -1.7668 | -2.3302 | -1.7982 |
| 243SOL | OW  | 761 | 0.532 | 2.248 | 1.492  | 0.0493  | 0.3564  | -0.3229 |
| 243SOL | HW1 | 762 | 0.615 | 2.252 | 1.437  | 1.2364  | -0.6672 | 1.3379  |
| 243SOL | HW2 | 763 | 0.553 | 2.217 | 1.584  | -2.4222 | -1.9164 | -0.3845 |
| 244SOL | OW  | 764 | 2.104 | 2.481 | 1.736  | -0.1978 | 0.0076  | -0.2796 |
| 244SOL | HW1 | 765 | 2.088 | 2.514 | 1.643  | -0.2655 | 0.0391  | -0.2570 |
| 244SOL | HW2 | 766 | 2.063 | 2.544 | 1.801  | -1.5433 | -0.8233 | -0.2831 |
| 245SOL | OW  | 767 | 2.118 | 0.733 | 0.390  | -0.1058 | -0.3881 | -0.1483 |
| 245SOL | HW1 | 768 | 2.160 | 0.752 | 0.479  | 0.6131  | -1.3612 | -0.2554 |
| 245SOL | HW2 | 769 | 2.022 | 0.760 | 0.392  | -0.0460 | -0.1911 | 0.8475  |
| 246SOL | OW  | 770 | 0.282 | 2.452 | 1.091  | 0.4531  | -0.1828 | -0.4185 |
| 246SOL | HW1 | 771 | 0.324 | 2.457 | 1.181  | 1.4974  | -1.0138 | -0.8460 |
| 246SOL | HW2 | 772 | 0.238 | 2.540 | 1.070  | -1.1391 | -0.4357 | 1.5020  |
| 247SOL | OW  | 773 | 1.575 | 0.633 | 0.186  | 0.0845  | 0.3548  | -0.4754 |
| 247SOL | HW1 | 774 | 1.620 | 0.670 | 0.267  | 0.7074  | 0.0610  | -0.6845 |
| 247SOL | HW2 | 775 | 1.583 | 0.533 | 0.186  | -2.2478 | 0.0841  | 0.4859  |
| 248SOL | OW  | 776 | 0.940 | 0.692 | 1.065  | 0.2282  | -0.3056 | 0.7143  |
| 248SOL | HW1 | 777 | 0.963 | 0.621 | 0.999  | -0.5941 | -0.7000 | 0.8335  |
| 248SOL | HW2 | 778 | 0.921 | 0.650 | 1.154  | -2.8642 | -0.2847 | 0.1755  |
| 249SOL | OW  | 779 | 1.005 | 0.679 | 0.334  | 0.2036  | 0.2791  | 0.0040  |
| 249SOL | HW1 | 780 | 0.923 | 0.663 | 0.279  | -0.1705 | -1.2465 | 0.9560  |
| 249SOL | HW2 | 781 | 0.982 | 0.670 | 0.431  | 1.3763  | 0.4103  | 0.3035  |
| 250SOL | OW  | 782 | 2.978 | 0.601 | 1.451  | 0.5600  | -0.0220 | -0.5073 |
| 250SOL | HW1 | 783 | 3.032 | 0.588 | 1.368  | 4.8567  | 0.6366  | 1.8784  |
| 250SOL | HW2 | 784 | 2.951 | 0.697 | 1.457  | 1.4937  | 0.2549  | -0.5203 |
| 251SOL | OW  | 785 | 2.101 | 1.047 | 0.776  | -0.0454 | -0.0706 | -0.1724 |
| 251SOL | HW1 | 786 | 2.087 | 1.105 | 0.695  | -2.0938 | -1.3775 | -0.8357 |
| 251SOL | HW2 | 787 | 2.072 | 1.097 | 0.858  | 1.1012  | 0.8982  | -0.3241 |
| 252SOL | OW  | 788 | 0.433 | 0.357 | 1.524  | 0.0713  | -0.2100 | 0.2512  |
| 252SOL | HW1 | 789 | 0.517 | 0.315 | 1.491  | -0.2626 | -1.1484 | 0.5416  |
| 252SOL | HW2 | 790 | 0.355 | 0.317 | 1.475  | -0.1971 | 0.8276  | -0.1927 |
| 253SOL | OW  | 791 | 2.901 | 2.977 | 1.315  | 0.9144  | -0.1159 | -0.0260 |
| 253SOL | HW1 | 792 | 2.926 | 2.928 | 1.231  | 1.9511  | -0.4868 | 0.4813  |
| 253SOL | HW2 | 793 | 2.885 | 3.073 | 1.293  | -0.4998 | -0.5286 | -0.9241 |
| 254SOL | OW  | 794 | 0.943 | 0.136 | 1.378  | -0.2092 | 0.1431  | -0.1571 |
| 254SOL | HW1 | 795 | 0.902 | 0.051 | 1.410  | 0.6756  | -0.3203 | -0.1992 |
| 254SOL | HW2 | 796 | 0.993 | 0.179 | 1.453  | 1.2861  | -0.5883 | -0.6878 |
| 255SOL | OW  | 797 | 1.681 | 0.972 | 1.673  | -0.3941 | 0.0318  | 0.1230  |
| 255SOL | HW1 | 798 | 1.650 | 0.889 | 1.719  | -0.6977 | -0.1013 | -0.3173 |
| 255SOL | HW2 | 799 | 1.765 | 0.952 | 1.623  | 0.1509  | 0.2721  | 0.9202  |
| 256SOL | OW  | 800 | 0.513 | 2.037 | 0.925  | -0.5079 | -0.2053 | -0.0790 |
| 256SOL | HW1 | 801 | 0.488 | 2.111 | 0.987  | 2.3411  | 1.5024  | -0.7991 |

|        |     |     |        |       |       |         |         |         |
|--------|-----|-----|--------|-------|-------|---------|---------|---------|
| 256SOL | HW2 | 802 | 0.492  | 2.063 | 0.831 | -1.0411 | -1.0658 | -0.2139 |
| 257SOL | OW  | 803 | 2.410  | 0.430 | 0.111 | 0.0136  | 0.3666  | -0.9790 |
| 257SOL | HW1 | 804 | 2.444  | 0.524 | 0.111 | -0.2527 | 0.4684  | -0.0353 |
| 257SOL | HW2 | 805 | 2.483  | 0.368 | 0.139 | 0.0309  | 0.3467  | -1.0668 |
| 258SOL | OW  | 806 | 2.338  | 0.638 | 1.135 | -0.1702 | -0.0902 | 0.2706  |
| 258SOL | HW1 | 807 | 2.258  | 0.615 | 1.080 | -0.1897 | -1.3405 | 0.7691  |
| 258SOL | HW2 | 808 | 2.420  | 0.633 | 1.079 | -0.3990 | 0.9056  | -0.1721 |
| 259SOL | OW  | 809 | 0.073  | 0.549 | 0.172 | -0.2705 | -0.1560 | -0.3443 |
| 259SOL | HW1 | 810 | -0.026 | 0.544 | 0.184 | -0.8178 | 4.8189  | -0.7687 |
| 259SOL | HW2 | 811 | 0.099  | 0.510 | 0.084 | -1.4252 | -3.3206 | 0.5867  |
| 260SOL | OW  | 812 | 2.858  | 0.118 | 0.912 | -0.4167 | -0.3511 | 0.2054  |
| 260SOL | HW1 | 813 | 2.939  | 0.159 | 0.870 | 0.2240  | 0.7187  | 2.3347  |
| 260SOL | HW2 | 814 | 2.877  | 0.023 | 0.935 | 0.0451  | -0.2620 | 0.2006  |
| 261SOL | OW  | 815 | 0.211  | 0.267 | 0.878 | 0.1868  | -0.0083 | -0.2974 |
| 261SOL | HW1 | 816 | 0.244  | 0.262 | 0.972 | 1.2561  | -0.2988 | -0.6741 |
| 261SOL | HW2 | 817 | 0.266  | 0.206 | 0.820 | -1.7652 | -1.4216 | -0.7583 |
| 262SOL | OW  | 818 | 2.298  | 2.934 | 1.947 | -0.5170 | -0.0175 | -0.0198 |
| 262SOL | HW1 | 819 | 2.299  | 3.016 | 1.889 | 2.4187  | 0.8426  | 1.0382  |
| 262SOL | HW2 | 820 | 2.384  | 2.884 | 1.934 | -1.4222 | -1.8684 | 0.8272  |
| 263SOL | OW  | 821 | 0.068  | 1.751 | 1.096 | 0.5650  | -0.4360 | -0.6800 |
| 263SOL | HW1 | 822 | 0.141  | 1.770 | 1.162 | 1.9953  | -1.3794 | -1.9101 |
| 263SOL | HW2 | 823 | 0.057  | 1.830 | 1.036 | 0.7567  | -0.3882 | -0.6551 |
| 264SOL | OW  | 824 | 1.052  | 0.799 | 1.787 | 0.1307  | -0.2751 | -0.4697 |
| 264SOL | HW1 | 825 | 0.998  | 0.851 | 1.853 | -2.0488 | -0.2700 | -2.1383 |
| 264SOL | HW2 | 826 | 1.135  | 0.850 | 1.765 | 0.0035  | 0.5728  | 0.8637  |
| 265SOL | OW  | 827 | 0.953  | 3.029 | 0.257 | 0.1262  | -0.5238 | -0.3121 |
| 265SOL | HW1 | 828 | 0.951  | 3.020 | 0.356 | 1.8526  | 1.1924  | -0.0712 |
| 265SOL | HW2 | 829 | 0.871  | 2.986 | 0.218 | -0.8395 | -0.7801 | 1.8629  |
| 266SOL | OW  | 830 | 1.829  | 0.789 | 0.336 | -0.3353 | -0.6945 | 0.0902  |
| 266SOL | HW1 | 831 | 1.794  | 0.725 | 0.404 | -0.8466 | 0.7624  | 1.2600  |
| 266SOL | HW2 | 832 | 1.814  | 0.883 | 0.368 | -0.9656 | 0.0650  | -2.2261 |
| 267SOL | OW  | 833 | 1.463  | 0.050 | 1.803 | -0.1885 | 0.1645  | 0.1936  |
| 267SOL | HW1 | 834 | 1.508  | 0.020 | 1.888 | -0.4032 | -1.1686 | -0.1335 |
| 267SOL | HW2 | 835 | 1.524  | 0.032 | 1.726 | -0.2900 | 0.6998  | -0.0146 |
| 268SOL | OW  | 836 | 2.871  | 0.754 | 0.262 | -0.2600 | -0.3625 | 0.2053  |
| 268SOL | HW1 | 837 | 2.798  | 0.743 | 0.329 | -0.2342 | -1.7379 | 0.0353  |
| 268SOL | HW2 | 838 | 2.888  | 0.666 | 0.217 | 0.8332  | 0.1678  | -0.4467 |
| 269SOL | OW  | 839 | 2.392  | 0.764 | 1.500 | -0.1534 | -0.1372 | -0.0626 |
| 269SOL | HW1 | 840 | 2.487  | 0.754 | 1.469 | -0.0276 | -2.6500 | 0.8791  |
| 269SOL | HW2 | 841 | 2.332  | 0.714 | 1.437 | -1.0908 | 2.5451  | -1.4235 |
| 270SOL | OW  | 842 | 1.523  | 3.044 | 2.024 | -0.4851 | 0.6239  | 0.0593  |
| 270SOL | HW1 | 843 | 1.476  | 2.973 | 1.972 | 0.3135  | -0.0458 | 0.2296  |
| 270SOL | HW2 | 844 | 1.519  | 3.021 | 2.122 | -0.7014 | 1.1035  | 0.1646  |
| 271SOL | OW  | 845 | 2.068  | 1.345 | 1.635 | 0.3352  | 0.6405  | 0.3397  |
| 271SOL | HW1 | 846 | 2.157  | 1.390 | 1.642 | 2.0429  | -2.5975 | 2.2670  |
| 271SOL | HW2 | 847 | 2.016  | 1.360 | 1.719 | 0.6165  | -0.2721 | 0.6953  |
| 272SOL | OW  | 848 | 2.691  | 1.217 | 1.751 | -0.5506 | -0.1399 | 0.2824  |
| 272SOL | HW1 | 849 | 2.725  | 1.127 | 1.723 | 1.7598  | 0.9447  | -0.6627 |
| 272SOL | HW2 | 850 | 2.629  | 1.206 | 1.829 | 0.4705  | -2.4597 | 0.8684  |
| 273SOL | OW  | 851 | 0.218  | 2.824 | 1.298 | 0.6730  | 0.0192  | -0.0257 |
| 273SOL | HW1 | 852 | 0.249  | 2.764 | 1.371 | -3.2118 | -0.7308 | 1.2514  |
| 273SOL | HW2 | 853 | 0.216  | 2.773 | 1.211 | 0.6156  | -0.6383 | 0.3560  |

|        |     |     |       |       |        |         |         |         |
|--------|-----|-----|-------|-------|--------|---------|---------|---------|
| 274SOL | OW  | 854 | 1.612 | 1.561 | 0.048  | -0.7269 | 0.2483  | -0.0222 |
| 274SOL | HW1 | 855 | 1.668 | 1.599 | 0.122  | -0.8050 | -0.2087 | 0.2739  |
| 274SOL | HW2 | 856 | 1.671 | 1.518 | -0.020 | -0.7576 | -1.6243 | 1.0592  |
| 275SOL | OW  | 857 | 0.404 | 0.669 | 2.099  | -0.6242 | 0.6114  | -0.5513 |
| 275SOL | HW1 | 858 | 0.343 | 0.706 | 2.030  | 1.2739  | 0.4874  | -2.3993 |
| 275SOL | HW2 | 859 | 0.465 | 0.741 | 2.133  | 0.4952  | 0.0469  | -1.3046 |
| 276SOL | OW  | 860 | 0.478 | 1.918 | 1.417  | -0.2371 | -0.3290 | -0.3200 |
| 276SOL | HW1 | 861 | 0.487 | 1.830 | 1.464  | 0.6411  | 0.0907  | 0.3286  |
| 276SOL | HW2 | 862 | 0.568 | 1.958 | 1.405  | -0.5966 | 0.2891  | -1.0005 |
| 277SOL | OW  | 863 | 1.963 | 2.878 | 2.209  | 0.1277  | -0.0658 | 0.5303  |
| 277SOL | HW1 | 864 | 1.932 | 2.970 | 2.184  | -1.9337 | -1.2103 | -1.5089 |
| 277SOL | HW2 | 865 | 2.062 | 2.878 | 2.218  | 0.2253  | 2.2602  | 0.1802  |
| 278SOL | OW  | 866 | 1.421 | 2.898 | 0.979  | -0.5560 | -0.0705 | -0.3528 |
| 278SOL | HW1 | 867 | 1.477 | 2.980 | 0.991  | -2.4614 | 1.1000  | 0.9882  |
| 278SOL | HW2 | 868 | 1.422 | 2.844 | 1.063  | -0.6546 | -0.5754 | -0.6674 |
| 279SOL | OW  | 869 | 1.611 | 2.354 | 0.769  | 0.0395  | -0.3320 | -0.4705 |
| 279SOL | HW1 | 870 | 1.535 | 2.335 | 0.831  | -0.1023 | 0.9564  | -0.2236 |
| 279SOL | HW2 | 871 | 1.697 | 2.350 | 0.820  | -0.0519 | 0.4196  | -0.2470 |
| 280SOL | OW  | 872 | 1.709 | 0.670 | 0.552  | -0.3021 | -0.6136 | 0.6861  |
| 280SOL | HW1 | 873 | 1.718 | 0.724 | 0.636  | 1.4539  | -1.3272 | 1.0029  |
| 280SOL | HW2 | 874 | 1.652 | 0.589 | 0.570  | 1.1957  | -1.5087 | 1.6231  |
| 281SOL | OW  | 875 | 1.468 | 0.600 | 1.564  | 0.3258  | -0.5092 | 0.3820  |
| 281SOL | HW1 | 876 | 1.500 | 0.648 | 1.483  | 2.9879  | -1.2171 | 0.9038  |
| 281SOL | HW2 | 877 | 1.377 | 0.563 | 1.548  | 0.4607  | 0.0520  | -1.9684 |
| 282SOL | OW  | 878 | 1.716 | 1.653 | 2.188  | -0.0867 | -0.2618 | -0.1042 |
| 282SOL | HW1 | 879 | 1.687 | 1.632 | 2.094  | -0.0366 | 1.3480  | -0.5046 |
| 282SOL | HW2 | 880 | 1.755 | 1.571 | 2.230  | -0.7346 | -1.1851 | -1.2474 |
| 283SOL | OW  | 881 | 0.546 | 1.344 | 0.280  | -0.1729 | -0.0512 | -0.0571 |
| 283SOL | HW1 | 882 | 0.533 | 1.411 | 0.353  | 0.3464  | 1.0549  | -0.9556 |
| 283SOL | HW2 | 883 | 0.545 | 1.390 | 0.192  | 2.2638  | -0.9008 | -0.6089 |
| 284SOL | OW  | 884 | 2.505 | 2.778 | 0.512  | 0.2232  | -0.4695 | -0.1671 |
| 284SOL | HW1 | 885 | 2.556 | 2.692 | 0.515  | -0.1877 | -0.7211 | 2.6227  |
| 284SOL | HW2 | 886 | 2.563 | 2.852 | 0.545  | -0.2549 | -0.2167 | 0.1296  |
| 285SOL | OW  | 887 | 1.213 | 0.003 | 1.991  | -0.7366 | -0.0572 | -0.1573 |
| 285SOL | HW1 | 888 | 1.291 | 0.032 | 1.935  | -0.8978 | -1.6884 | -1.2899 |
| 285SOL | HW2 | 889 | 1.129 | 0.014 | 1.938  | -0.7886 | -2.6430 | -0.7083 |
| 286SOL | OW  | 890 | 0.493 | 0.752 | 0.609  | 0.8919  | 0.1471  | 1.1969  |
| 286SOL | HW1 | 891 | 0.444 | 0.678 | 0.654  | 0.9689  | 0.2420  | 1.4344  |
| 286SOL | HW2 | 892 | 0.427 | 0.814 | 0.566  | 0.8609  | -0.8252 | -0.2329 |
| 287SOL | OW  | 893 | 1.870 | 2.136 | 2.109  | 0.4017  | -0.6270 | -0.1468 |
| 287SOL | HW1 | 894 | 1.968 | 2.151 | 2.097  | 0.6697  | -2.0513 | 0.0673  |
| 287SOL | HW2 | 895 | 1.854 | 2.043 | 2.142  | -1.0935 | -0.8331 | -1.3116 |
| 288SOL | OW  | 896 | 0.478 | 3.162 | 0.469  | 0.2407  | 1.0525  | -0.2680 |
| 288SOL | HW1 | 897 | 0.449 | 3.128 | 0.380  | -0.8861 | 1.0021  | 0.1145  |
| 288SOL | HW2 | 898 | 0.519 | 3.087 | 0.522  | -0.4327 | 0.7433  | -0.1815 |
| 289SOL | OW  | 899 | 2.948 | 2.786 | 1.129  | -0.3762 | -0.2528 | -0.6817 |
| 289SOL | HW1 | 900 | 2.918 | 2.736 | 1.048  | 0.2606  | 0.8241  | -1.6049 |
| 289SOL | HW2 | 901 | 3.014 | 2.730 | 1.180  | -0.0056 | -0.5333 | -1.4555 |
| 290SOL | OW  | 902 | 0.691 | 0.310 | 0.742  | -0.1560 | 0.2517  | 0.5315  |
| 290SOL | HW1 | 903 | 0.729 | 0.348 | 0.826  | -0.6882 | 0.4597  | 0.6860  |
| 290SOL | HW2 | 904 | 0.713 | 0.213 | 0.736  | -1.3158 | -0.1008 | 1.6315  |
| 291SOL | OW  | 905 | 0.432 | 1.097 | 0.745  | 0.1914  | -0.1118 | 0.7684  |

|        |     |     |       |       |       |         |         |         |
|--------|-----|-----|-------|-------|-------|---------|---------|---------|
| 291SOL | HW1 | 906 | 0.389 | 1.036 | 0.678 | -0.4770 | 0.2182  | 0.8935  |
| 291SOL | HW2 | 907 | 0.501 | 1.046 | 0.796 | 1.5458  | -0.0865 | -0.9443 |
| 292SOL | OW  | 908 | 2.861 | 0.157 | 1.283 | 0.5525  | -0.2678 | 0.0032  |
| 292SOL | HW1 | 909 | 2.870 | 0.236 | 1.222 | 0.7623  | 0.0438  | 0.4273  |
| 292SOL | HW2 | 910 | 2.885 | 0.185 | 1.376 | 0.9000  | -0.9047 | 0.1075  |
| 293SOL | OW  | 911 | 0.462 | 2.926 | 1.310 | -0.3194 | -0.4521 | -0.3501 |
| 293SOL | HW1 | 912 | 0.492 | 2.851 | 1.371 | -0.8953 | -0.0257 | 0.4826  |
| 293SOL | HW2 | 913 | 0.363 | 2.920 | 1.297 | -0.5310 | 0.7180  | 0.5252  |
| 294SOL | OW  | 914 | 2.820 | 1.321 | 0.778 | -0.0823 | 0.7086  | -0.5380 |
| 294SOL | HW1 | 915 | 2.823 | 1.317 | 0.878 | 2.4189  | -2.5135 | -0.5509 |
| 294SOL | HW2 | 916 | 2.896 | 1.377 | 0.744 | 1.6779  | -1.5114 | -0.5203 |
| 295SOL | OW  | 917 | 2.761 | 0.628 | 1.619 | 0.0829  | 0.1674  | -0.4295 |
| 295SOL | HW1 | 918 | 2.775 | 0.669 | 1.710 | 1.0949  | 1.6626  | -1.2191 |
| 295SOL | HW2 | 919 | 2.850 | 0.603 | 1.580 | -0.1345 | 1.6231  | -1.9309 |
| 296SOL | OW  | 920 | 1.437 | 1.475 | 0.986 | -0.5315 | -0.2510 | 0.0588  |
| 296SOL | HW1 | 921 | 1.411 | 1.524 | 0.902 | 1.6374  | -0.0640 | -0.5588 |
| 296SOL | HW2 | 922 | 1.379 | 1.395 | 0.997 | -2.1897 | 0.8134  | -0.5050 |
| 297SOL | OW  | 923 | 2.684 | 0.462 | 1.193 | -0.1694 | 0.6551  | -0.2831 |
| 297SOL | HW1 | 924 | 2.621 | 0.390 | 1.222 | -0.9469 | 0.6180  | -1.9423 |
| 297SOL | HW2 | 925 | 2.772 | 0.421 | 1.168 | -0.4817 | 0.3048  | -0.8447 |
| 298SOL | OW  | 926 | 0.178 | 1.806 | 2.081 | 0.3105  | -0.9237 | 0.3374  |
| 298SOL | HW1 | 927 | 0.117 | 1.800 | 2.160 | -0.5461 | 1.6880  | -0.0137 |
| 298SOL | HW2 | 928 | 0.147 | 1.742 | 2.010 | -1.4439 | -0.4103 | 0.5835  |
| 299SOL | OW  | 929 | 0.814 | 3.030 | 1.437 | -0.2267 | 0.1071  | -0.3487 |
| 299SOL | HW1 | 930 | 0.887 | 3.029 | 1.506 | -0.6557 | -1.5208 | 0.1073  |
| 299SOL | HW2 | 931 | 0.728 | 3.054 | 1.481 | -0.1336 | 1.1995  | -0.7366 |
| 300SOL | OW  | 932 | 0.171 | 2.711 | 1.052 | 0.3116  | -0.2563 | 0.1121  |
| 300SOL | HW1 | 933 | 0.091 | 2.697 | 0.995 | 0.4686  | 0.8826  | -0.4219 |
| 300SOL | HW2 | 934 | 0.239 | 2.763 | 1.001 | 0.3285  | 1.0845  | 1.4440  |
| 301SOL | OW  | 935 | 1.497 | 1.935 | 1.273 | -0.1576 | 0.2718  | -0.0851 |
| 301SOL | HW1 | 936 | 1.440 | 1.853 | 1.282 | -1.8199 | 1.4528  | 0.7559  |
| 301SOL | HW2 | 937 | 1.567 | 1.935 | 1.345 | -0.6847 | -0.0211 | 0.4407  |
| 302SOL | OW  | 938 | 2.335 | 0.121 | 2.234 | -0.5249 | -0.5743 | 0.4743  |
| 302SOL | HW1 | 939 | 2.267 | 0.188 | 2.203 | -0.5659 | -1.4204 | -1.4169 |
| 302SOL | HW2 | 940 | 2.410 | 0.117 | 2.168 | 1.0268  | -0.2308 | 2.1340  |
| 303SOL | OW  | 941 | 2.441 | 0.284 | 1.271 | -0.3076 | 0.1224  | -0.5096 |
| 303SOL | HW1 | 942 | 2.414 | 0.288 | 1.175 | -1.5947 | -0.1426 | -0.1648 |
| 303SOL | HW2 | 943 | 2.497 | 0.202 | 1.286 | 1.0404  | 0.8526  | -1.2878 |
| 304SOL | OW  | 944 | 1.489 | 1.091 | 1.073 | 0.4605  | -0.2742 | 0.1288  |
| 304SOL | HW1 | 945 | 1.476 | 1.050 | 1.163 | -1.2679 | -1.4391 | -0.6042 |
| 304SOL | HW2 | 946 | 1.424 | 1.167 | 1.061 | 1.0432  | 0.2182  | 0.0484  |
| 305SOL | OW  | 947 | 1.897 | 0.643 | 0.827 | 0.0152  | 0.4898  | -0.0836 |
| 305SOL | HW1 | 948 | 1.837 | 0.566 | 0.802 | 0.5726  | 0.1011  | -0.2278 |
| 305SOL | HW2 | 949 | 1.845 | 0.728 | 0.820 | -0.8231 | 0.0733  | 0.7735  |
| 306SOL | OW  | 950 | 2.278 | 2.823 | 1.260 | 0.1984  | 0.0329  | -0.0748 |
| 306SOL | HW1 | 951 | 2.297 | 2.743 | 1.204 | -0.5957 | -0.6060 | 0.5439  |
| 306SOL | HW2 | 952 | 2.315 | 2.904 | 1.215 | -1.2672 | -0.3046 | -2.0385 |
| 307SOL | OW  | 953 | 1.674 | 0.911 | 1.017 | -0.3622 | 0.2355  | 0.0155  |
| 307SOL | HW1 | 954 | 1.750 | 0.910 | 1.082 | -1.1281 | 0.4063  | 0.9560  |
| 307SOL | HW2 | 955 | 1.620 | 0.994 | 1.031 | -0.4486 | 0.3491  | -0.9672 |
| 308SOL | OW  | 956 | 0.225 | 0.675 | 1.293 | 0.0808  | -0.1388 | 0.1870  |
| 308SOL | HW1 | 957 | 0.280 | 0.593 | 1.279 | -0.7416 | -0.6294 | -0.2120 |

|        |     |      |       |       |       |         |         |         |
|--------|-----|------|-------|-------|-------|---------|---------|---------|
| 308SOL | HW2 | 958  | 0.134 | 0.662 | 1.254 | -0.2191 | 0.7861  | 0.5437  |
| 309SOL | OW  | 959  | 3.066 | 0.683 | 1.764 | -0.3427 | 0.0541  | 0.9656  |
| 309SOL | HW1 | 960  | 3.114 | 0.688 | 1.676 | -0.8645 | 0.4293  | 0.6961  |
| 309SOL | HW2 | 961  | 3.067 | 0.588 | 1.797 | -1.9502 | -0.5321 | -0.4843 |
| 310SOL | OW  | 962  | 2.386 | 0.527 | 1.648 | -0.7380 | -0.3703 | -0.5138 |
| 310SOL | HW1 | 963  | 2.416 | 0.604 | 1.592 | -2.8850 | 0.8519  | -0.0879 |
| 310SOL | HW2 | 964  | 2.361 | 0.451 | 1.589 | 2.6606  | -1.3531 | -0.9043 |
| 311SOL | OW  | 965  | 2.574 | 2.577 | 0.727 | -0.2744 | 0.1346  | 0.0923  |
| 311SOL | HW1 | 966  | 2.634 | 2.637 | 0.780 | 1.3946  | 1.6002  | -3.1654 |
| 311SOL | HW2 | 967  | 2.484 | 2.573 | 0.771 | 0.9957  | 0.9722  | 3.0683  |
| 312SOL | OW  | 968  | 0.756 | 0.542 | 1.510 | -0.4811 | -0.1246 | -0.1712 |
| 312SOL | HW1 | 969  | 0.668 | 0.588 | 1.516 | 0.1162  | 1.2218  | -1.2506 |
| 312SOL | HW2 | 970  | 0.807 | 0.557 | 1.595 | -0.1437 | 1.5717  | -0.6463 |
| 313SOL | OW  | 971  | 1.951 | 0.864 | 0.090 | -0.0166 | 0.1407  | 0.9759  |
| 313SOL | HW1 | 972  | 1.904 | 0.848 | 0.176 | 1.0629  | 0.3329  | 1.6272  |
| 313SOL | HW2 | 973  | 1.962 | 0.777 | 0.041 | 0.5525  | -0.2004 | 1.6831  |
| 314SOL | OW  | 974  | 0.300 | 2.667 | 1.501 | 0.3179  | 0.0520  | -0.0323 |
| 314SOL | HW1 | 975  | 0.261 | 2.621 | 1.581 | 0.0651  | -0.3085 | -0.3616 |
| 314SOL | HW2 | 976  | 0.392 | 2.699 | 1.523 | 0.3694  | -0.3226 | 0.3035  |
| 315SOL | OW  | 977  | 1.017 | 1.771 | 1.552 | -0.7285 | 0.1676  | 0.0680  |
| 315SOL | HW1 | 978  | 0.940 | 1.711 | 1.571 | -1.7381 | 1.4510  | 0.2027  |
| 315SOL | HW2 | 979  | 1.102 | 1.730 | 1.585 | -1.3622 | -1.2283 | 0.0018  |
| 316SOL | OW  | 980  | 2.109 | 2.168 | 1.977 | -0.2879 | -0.2807 | -0.6359 |
| 316SOL | HW1 | 981  | 2.092 | 2.234 | 1.904 | 1.7196  | -1.3879 | -2.1901 |
| 316SOL | HW2 | 982  | 2.093 | 2.076 | 1.943 | -0.7975 | -0.7693 | 0.8228  |
| 317SOL | OW  | 983  | 1.404 | 2.195 | 2.028 | 1.0773  | -0.1442 | -0.2017 |
| 317SOL | HW1 | 984  | 1.475 | 2.254 | 2.067 | 0.4326  | -0.0786 | 0.9087  |
| 317SOL | HW2 | 985  | 1.329 | 2.251 | 1.993 | 0.9026  | -0.2642 | -0.0219 |
| 318SOL | OW  | 986  | 3.059 | 2.744 | 2.010 | 0.3654  | -0.2037 | -0.4043 |
| 318SOL | HW1 | 987  | 3.141 | 2.742 | 2.066 | -0.9555 | -0.3065 | 1.6114  |
| 318SOL | HW2 | 988  | 3.022 | 2.837 | 2.008 | 0.0277  | -0.3404 | -0.5591 |
| 319SOL | OW  | 989  | 1.074 | 1.558 | 1.181 | -0.3990 | 0.3928  | 0.6512  |
| 319SOL | HW1 | 990  | 1.096 | 1.634 | 1.120 | -0.2662 | -0.7907 | -0.8235 |
| 319SOL | HW2 | 991  | 1.051 | 1.477 | 1.127 | -0.5063 | -0.6373 | 2.1793  |
| 320SOL | OW  | 992  | 1.129 | 0.231 | 0.829 | 0.0166  | 0.3270  | 0.2218  |
| 320SOL | HW1 | 993  | 1.211 | 0.175 | 0.827 | 0.0769  | 0.4062  | -1.6893 |
| 320SOL | HW2 | 994  | 1.062 | 0.191 | 0.890 | 0.9415  | -0.5062 | 0.7154  |
| 321SOL | OW  | 995  | 2.381 | 2.990 | 1.040 | -0.0168 | -0.0569 | -0.3710 |
| 321SOL | HW1 | 996  | 2.316 | 3.061 | 1.012 | 0.4392  | 0.3383  | -0.4395 |
| 321SOL | HW2 | 997  | 2.406 | 2.934 | 0.960 | -1.1118 | -0.9190 | -0.1385 |
| 322SOL | OW  | 998  | 2.443 | 1.916 | 1.146 | -0.2222 | -0.2656 | -0.3596 |
| 322SOL | HW1 | 999  | 2.420 | 1.822 | 1.124 | -0.1481 | -0.0021 | -1.6234 |
| 322SOL | HW2 | 1000 | 2.360 | 1.970 | 1.155 | -0.2196 | 0.0187  | -1.8594 |
| 323SOL | OW  | 1001 | 0.206 | 0.727 | 0.340 | -0.2264 | 0.4924  | 0.4397  |
| 323SOL | HW1 | 1002 | 0.299 | 0.754 | 0.312 | -0.5214 | -0.2552 | -1.4258 |
| 323SOL | HW2 | 1003 | 0.172 | 0.657 | 0.278 | -2.8399 | 2.1831  | -0.1956 |
| 324SOL | OW  | 1004 | 2.712 | 0.960 | 1.696 | -0.7251 | 0.3838  | 0.5337  |
| 324SOL | HW1 | 1005 | 2.784 | 0.947 | 1.628 | -2.0123 | 0.6259  | -0.9314 |
| 324SOL | HW2 | 1006 | 2.732 | 0.904 | 1.776 | 1.6578  | 1.3024  | 0.6727  |
| 325SOL | OW  | 1007 | 2.790 | 2.596 | 0.987 | 0.1845  | -0.2172 | -0.7812 |
| 325SOL | HW1 | 1008 | 2.709 | 2.604 | 1.046 | -1.7494 | -0.5520 | -3.2107 |
| 325SOL | HW2 | 1009 | 2.834 | 2.508 | 1.003 | -0.2635 | -0.2865 | 0.1686  |



|        |          |       |        |       |         |         |         |
|--------|----------|-------|--------|-------|---------|---------|---------|
| 326SOL | OW 1010  | 2.296 | 0.457  | 0.816 | 0.2332  | 0.0727  | -0.1973 |
| 326SOL | HW1 1011 | 2.347 | 0.542  | 0.808 | -0.2160 | 0.3315  | -0.3244 |
| 326SOL | HW2 1012 | 2.263 | 0.429  | 0.726 | -0.1073 | 0.0652  | -0.0707 |
| 327SOL | OW 1013  | 1.807 | 0.227  | 1.289 | 0.3189  | -0.2128 | 0.2420  |
| 327SOL | HW1 1014 | 1.853 | 0.315  | 1.278 | -1.4611 | 0.9802  | 1.7277  |
| 327SOL | HW2 1015 | 1.742 | 0.214  | 1.215 | -0.4391 | 0.4268  | 0.7787  |
| 328SOL | OW 1016  | 0.053 | 2.288  | 1.105 | 0.3008  | 0.2942  | 0.0973  |
| 328SOL | HW1 1017 | 0.114 | 2.208  | 1.094 | 0.0423  | -0.0527 | 1.0846  |
| 328SOL | HW2 1018 | 0.108 | 2.371  | 1.105 | 0.6080  | 0.1042  | -0.6193 |
| 329SOL | OW 1019  | 1.905 | 0.045  | 0.261 | -0.0272 | 0.6197  | -0.2047 |
| 329SOL | HW1 1020 | 1.914 | 0.142  | 0.284 | -0.7725 | 0.4816  | 0.7384  |
| 329SOL | HW2 1021 | 1.808 | 0.019  | 0.264 | 0.3055  | -0.6153 | 1.5744  |
| 330SOL | OW 1022  | 0.981 | 0.530  | 1.753 | 0.7962  | 0.0262  | 0.0167  |
| 330SOL | HW1 1023 | 1.011 | 0.623  | 1.777 | 1.5713  | -0.5250 | 1.2910  |
| 330SOL | HW2 1024 | 0.906 | 0.503  | 1.812 | 0.4333  | -0.0941 | -0.4904 |
| 331SOL | OW 1025  | 0.485 | 0.061  | 1.252 | -0.5341 | -0.1270 | 0.4541  |
| 331SOL | HW1 1026 | 0.476 | -0.033 | 1.285 | 1.5799  | -0.1537 | 1.0634  |
| 331SOL | HW2 1027 | 0.546 | 0.112  | 1.312 | -0.4732 | 1.2395  | -0.7080 |
| 332SOL | OW 1028  | 0.901 | 0.908  | 0.553 | 0.2294  | 0.0920  | 0.1593  |
| 332SOL | HW1 1029 | 0.930 | 0.952  | 0.639 | -0.3775 | -0.2223 | 0.5368  |
| 332SOL | HW2 1030 | 0.882 | 0.811  | 0.570 | -0.0211 | 0.0568  | -0.2999 |
| 333SOL | OW 1031  | 3.018 | 0.190  | 0.384 | 0.1928  | -0.2685 | -0.4759 |
| 333SOL | HW1 1032 | 3.030 | 0.129  | 0.306 | -0.4761 | -0.6354 | -0.2892 |
| 333SOL | HW2 1033 | 3.084 | 0.266  | 0.377 | 1.1323  | -1.0807 | -0.6257 |
| 334SOL | OW 1034  | 2.700 | 2.309  | 1.978 | -0.0601 | -0.5024 | 0.0104  |
| 334SOL | HW1 1035 | 2.716 | 2.362  | 2.062 | -0.8633 | 1.6582  | -1.1033 |
| 334SOL | HW2 1036 | 2.784 | 2.262  | 1.951 | 0.7601  | 0.3560  | 0.9871  |
| 335SOL | OW 1037  | 0.868 | 1.385  | 1.528 | 0.1212  | -0.6005 | 0.0349  |
| 335SOL | HW1 1038 | 0.965 | 1.408  | 1.529 | -0.0443 | 0.1399  | 1.2670  |
| 335SOL | HW2 1039 | 0.840 | 1.361  | 1.435 | 0.8285  | 1.9819  | -0.9186 |
| 336SOL | OW 1040  | 2.462 | 2.272  | 0.748 | -0.2365 | -0.0258 | -1.0597 |
| 336SOL | HW1 1041 | 2.425 | 2.358  | 0.781 | 1.0743  | 0.0985  | 0.1971  |
| 336SOL | HW2 1042 | 2.390 | 2.219  | 0.702 | -1.3823 | 1.1187  | -0.6280 |
| 337SOL | OW 1043  | 1.166 | 1.619  | 1.722 | 0.6685  | 0.1168  | -0.6389 |
| 337SOL | HW1 1044 | 1.097 | 1.660  | 1.782 | 0.4050  | 0.3154  | -1.0713 |
| 337SOL | HW2 1045 | 1.246 | 1.593  | 1.776 | -0.1475 | -1.0734 | 0.0635  |
| 338SOL | OW 1046  | 1.363 | 1.581  | 1.889 | 0.5476  | 0.3664  | -0.0810 |
| 338SOL | HW1 1047 | 1.329 | 1.575  | 1.983 | -0.5891 | 0.3590  | -0.4801 |
| 338SOL | HW2 1048 | 1.453 | 1.538  | 1.884 | 0.2372  | -0.4170 | 0.8142  |
| 339SOL | OW 1049  | 1.324 | 2.409  | 0.182 | -0.0161 | -0.2499 | 0.2402  |
| 339SOL | HW1 1050 | 1.300 | 2.494  | 0.230 | 1.9969  | 0.6715  | -0.3084 |
| 339SOL | HW2 1051 | 1.325 | 2.333  | 0.247 | -1.9342 | 0.0715  | 0.7204  |
| 340SOL | OW 1052  | 0.235 | 0.529  | 1.681 | 0.1615  | -0.4110 | 0.2185  |
| 340SOL | HW1 1053 | 0.186 | 0.604  | 1.637 | -0.6992 | 0.0621  | 1.8816  |
| 340SOL | HW2 1054 | 0.296 | 0.485  | 1.615 | -1.0549 | 0.2438  | -1.3974 |
| 341SOL | OW 1055  | 1.515 | 2.164  | 1.701 | -0.2789 | 0.5147  | -0.7783 |
| 341SOL | HW1 1056 | 1.606 | 2.141  | 1.735 | -0.2557 | 1.1514  | -0.4073 |
| 341SOL | HW2 1057 | 1.446 | 2.121  | 1.759 | -0.2245 | 0.5743  | -0.6699 |
| 342SOL | OW 1058  | 1.431 | 0.812  | 0.740 | 0.1384  | -0.2608 | 0.5782  |
| 342SOL | HW1 1059 | 1.377 | 0.797  | 0.657 | 1.8772  | 1.1221  | -0.8636 |
| 342SOL | HW2 1060 | 1.519 | 0.852  | 0.717 | 0.5604  | 0.4970  | 3.1410  |
| 343SOL | OW 1061  | 1.594 | 1.732  | 0.718 | -0.0649 | -0.2075 | -0.0063 |

|        |     |      |       |       |        |         |         |         |
|--------|-----|------|-------|-------|--------|---------|---------|---------|
| 343SOL | HW1 | 1062 | 1.550 | 1.733 | 0.808  | 0.5666  | 0.7841  | 0.3199  |
| 343SOL | HW2 | 1063 | 1.635 | 1.822 | 0.701  | 1.0664  | -0.8190 | -0.6578 |
| 344SOL | OW  | 1064 | 1.592 | 2.063 | 0.068  | -0.0157 | 0.2452  | -0.0415 |
| 344SOL | HW1 | 1065 | 1.603 | 1.977 | 0.117  | 0.7035  | 1.3043  | 1.7324  |
| 344SOL | HW2 | 1066 | 1.496 | 2.074 | 0.042  | -0.1669 | -0.9426 | -0.0442 |
| 345SOL | OW  | 1067 | 3.000 | 1.217 | 0.246  | -0.5267 | 0.2768  | -0.2999 |
| 345SOL | HW1 | 1068 | 2.999 | 1.269 | 0.332  | -0.4463 | 1.0077  | -0.7383 |
| 345SOL | HW2 | 1069 | 3.030 | 1.124 | 0.265  | -1.1755 | 0.2274  | 0.5826  |
| 346SOL | OW  | 1070 | 1.920 | 3.046 | 1.555  | -0.2660 | 1.0633  | -0.0345 |
| 346SOL | HW1 | 1071 | 1.826 | 3.012 | 1.562  | -0.1571 | 0.1660  | -2.0519 |
| 346SOL | HW2 | 1072 | 1.975 | 3.007 | 1.629  | -1.0610 | -0.0141 | 0.0184  |
| 347SOL | OW  | 1073 | 1.814 | 2.221 | 0.371  | -0.3018 | 0.2672  | 0.1149  |
| 347SOL | HW1 | 1074 | 1.874 | 2.148 | 0.340  | 1.0861  | 1.6611  | -0.6219 |
| 347SOL | HW2 | 1075 | 1.762 | 2.257 | 0.293  | -0.4453 | 0.5242  | 0.3269  |
| 348SOL | OW  | 1076 | 2.909 | 2.356 | 1.067  | 0.6037  | -0.1234 | 0.4616  |
| 348SOL | HW1 | 1077 | 2.887 | 2.404 | 1.151  | 1.1114  | 0.9249  | 0.0212  |
| 348SOL | HW2 | 1078 | 3.006 | 2.328 | 1.069  | 0.5784  | -0.2268 | 0.2858  |
| 349SOL | OW  | 1079 | 0.642 | 2.285 | 0.016  | -0.3358 | -0.8560 | 0.5489  |
| 349SOL | HW1 | 1080 | 0.561 | 2.238 | -0.018 | -0.4796 | -0.2844 | 0.0742  |
| 349SOL | HW2 | 1081 | 0.620 | 2.330 | 0.102  | -1.1700 | 1.0464  | -0.5899 |
| 350SOL | OW  | 1082 | 2.273 | 2.891 | 2.209  | 0.1864  | -0.5978 | -0.1630 |
| 350SOL | HW1 | 1083 | 2.285 | 2.925 | 2.115  | 0.0230  | -2.5530 | -0.9521 |
| 350SOL | HW2 | 1084 | 2.300 | 2.795 | 2.212  | 0.2273  | -0.5536 | 1.8378  |
| 351SOL | OW  | 1085 | 0.600 | 2.462 | 0.228  | 0.0712  | -0.1120 | 0.0453  |
| 351SOL | HW1 | 1086 | 0.679 | 2.524 | 0.237  | 1.3691  | -1.5936 | -0.6049 |
| 351SOL | HW2 | 1087 | 0.516 | 2.516 | 0.219  | 1.0964  | 1.5303  | -0.1443 |
| 352SOL | OW  | 1088 | 1.837 | 2.245 | 0.898  | 0.8290  | -0.2641 | -0.1884 |
| 352SOL | HW1 | 1089 | 1.810 | 2.280 | 0.987  | -0.3919 | 0.0042  | -0.6478 |
| 352SOL | HW2 | 1090 | 1.936 | 2.255 | 0.887  | 1.0991  | -0.9957 | 1.4143  |
| 353SOL | OW  | 1091 | 1.845 | 2.564 | 0.219  | 0.4491  | 0.1509  | -0.5489 |
| 353SOL | HW1 | 1092 | 1.800 | 2.484 | 0.178  | -0.0069 | 0.2137  | -0.1868 |
| 353SOL | HW2 | 1093 | 1.858 | 2.547 | 0.317  | -0.3638 | 0.8254  | -0.3098 |
| 354SOL | OW  | 1094 | 1.853 | 0.809 | 1.273  | -0.4317 | 0.2567  | 0.0117  |
| 354SOL | HW1 | 1095 | 1.900 | 0.757 | 1.344  | -0.2322 | 1.2086  | 0.5866  |
| 354SOL | HW2 | 1096 | 1.835 | 0.902 | 1.305  | -3.2245 | -0.2222 | 0.0245  |
| 355SOL | OW  | 1097 | 3.051 | 2.617 | 0.901  | 0.0096  | -0.6097 | 0.6192  |
| 355SOL | HW1 | 1098 | 2.954 | 2.607 | 0.879  | 0.4482  | -2.7193 | -0.5843 |
| 355SOL | HW2 | 1099 | 3.104 | 2.551 | 0.849  | 1.9453  | -0.6675 | 2.5419  |
| 356SOL | OW  | 1100 | 0.972 | 1.220 | 2.206  | -0.4001 | -0.4452 | -0.2739 |
| 356SOL | HW1 | 1101 | 0.872 | 1.228 | 2.210  | -0.3246 | 0.5754  | -0.1561 |
| 356SOL | HW2 | 1102 | 1.001 | 1.224 | 2.110  | -0.4559 | -0.4127 | -0.2902 |
| 357SOL | OW  | 1103 | 2.865 | 2.013 | 0.189  | -0.1599 | 0.3965  | 0.3276  |
| 357SOL | HW1 | 1104 | 2.820 | 1.992 | 0.103  | 0.6205  | 0.0010  | 0.0012  |
| 357SOL | HW2 | 1105 | 2.803 | 1.996 | 0.265  | -0.2672 | -1.0178 | -0.0532 |
| 358SOL | OW  | 1106 | 3.002 | 1.783 | 0.443  | 0.1043  | 0.2253  | -0.4259 |
| 358SOL | HW1 | 1107 | 3.040 | 1.727 | 0.370  | 0.6178  | 1.8329  | -1.4474 |
| 358SOL | HW2 | 1108 | 2.902 | 1.787 | 0.434  | -0.2780 | -2.5821 | 1.2337  |
| 359SOL | OW  | 1109 | 2.488 | 1.984 | 0.868  | -0.4600 | -0.8608 | 0.0156  |
| 359SOL | HW1 | 1110 | 2.436 | 1.993 | 0.953  | -0.7142 | 1.2595  | -0.3023 |
| 359SOL | HW2 | 1111 | 2.499 | 2.075 | 0.827  | 0.2859  | -1.7566 | -1.8441 |
| 360SOL | OW  | 1112 | 0.014 | 1.424 | 0.072  | -0.4998 | -0.2389 | -0.0589 |
| 360SOL | HW1 | 1113 | 0.078 | 1.499 | 0.054  | -0.1159 | -0.6754 | -0.5160 |

|        |     |      |       |       |       |         |         |         |
|--------|-----|------|-------|-------|-------|---------|---------|---------|
| 360SOL | HW2 | 1114 | 0.065 | 1.341 | 0.094 | -0.9169 | 0.0895  | 2.4880  |
| 361SOL | OW  | 1115 | 2.979 | 2.527 | 0.153 | -0.4706 | 0.8626  | 0.6253  |
| 361SOL | HW1 | 1116 | 3.043 | 2.599 | 0.128 | -0.7805 | 1.9147  | 2.6939  |
| 361SOL | HW2 | 1117 | 2.886 | 2.557 | 0.133 | -0.5235 | 0.5332  | 0.3707  |
| 362SOL | OW  | 1118 | 0.928 | 1.272 | 0.568 | -0.0803 | -0.3978 | -0.1214 |
| 362SOL | HW1 | 1119 | 0.978 | 1.196 | 0.610 | 0.2885  | -0.5973 | -0.9065 |
| 362SOL | HW2 | 1120 | 0.900 | 1.246 | 0.476 | 0.0721  | 0.4333  | -0.4070 |
| 363SOL | OW  | 1121 | 2.293 | 2.568 | 1.122 | 0.1352  | -0.0204 | 0.4480  |
| 363SOL | HW1 | 1122 | 2.199 | 2.558 | 1.091 | 0.2268  | -1.8715 | 0.7021  |
| 363SOL | HW2 | 1123 | 2.308 | 2.512 | 1.204 | 1.4682  | 0.2282  | 0.3977  |
| 364SOL | OW  | 1124 | 0.113 | 0.920 | 0.112 | -0.0874 | 0.2703  | -0.0126 |
| 364SOL | HW1 | 1125 | 0.035 | 0.927 | 0.173 | -1.0490 | 0.2072  | -1.1834 |
| 364SOL | HW2 | 1126 | 0.192 | 0.883 | 0.161 | -0.0210 | 2.6963  | 1.8384  |
| 365SOL | OW  | 1127 | 2.138 | 2.814 | 0.478 | -0.7532 | -0.9787 | -0.1733 |
| 365SOL | HW1 | 1128 | 2.048 | 2.837 | 0.440 | -1.7602 | -3.3664 | 0.5486  |
| 365SOL | HW2 | 1129 | 2.208 | 2.830 | 0.408 | -2.0068 | -1.0372 | -1.5053 |
| 366SOL | OW  | 1130 | 2.595 | 1.565 | 0.777 | -0.1887 | -0.0376 | 0.4374  |
| 366SOL | HW1 | 1131 | 2.642 | 1.512 | 0.707 | 2.5521  | -2.0106 | 3.4332  |
| 366SOL | HW2 | 1132 | 2.650 | 1.645 | 0.801 | -0.9022 | 0.4261  | 0.5569  |
| 367SOL | OW  | 1133 | 3.149 | 0.898 | 2.097 | 0.2460  | -0.1991 | -0.2267 |
| 367SOL | HW1 | 1134 | 3.055 | 0.911 | 2.131 | 0.1973  | 0.7137  | -0.6728 |
| 367SOL | HW2 | 1135 | 3.150 | 0.909 | 1.998 | 0.6848  | -1.0786 | -0.3237 |
| 368SOL | OW  | 1136 | 1.266 | 1.361 | 0.545 | -0.0430 | -0.0545 | 0.0637  |
| 368SOL | HW1 | 1137 | 1.292 | 1.265 | 0.557 | 0.8226  | 0.3406  | 1.8326  |
| 368SOL | HW2 | 1138 | 1.210 | 1.371 | 0.464 | 0.9774  | -1.8388 | -0.9275 |
| 369SOL | OW  | 1139 | 2.202 | 1.689 | 0.981 | 0.2296  | -0.3315 | -0.2679 |
| 369SOL | HW1 | 1140 | 2.131 | 1.760 | 0.983 | -0.8716 | -1.2323 | -3.2160 |
| 369SOL | HW2 | 1141 | 2.283 | 1.724 | 0.934 | 0.0701  | -0.6883 | -0.8158 |
| 370SOL | OW  | 1142 | 1.213 | 0.568 | 0.164 | -0.2095 | -0.3588 | -0.5126 |
| 370SOL | HW1 | 1143 | 1.300 | 0.616 | 0.166 | 0.1736  | -1.0453 | 1.8219  |
| 370SOL | HW2 | 1144 | 1.145 | 0.620 | 0.215 | -0.5859 | -0.8587 | -0.4952 |
| 371SOL | OW  | 1145 | 2.061 | 1.208 | 0.560 | -0.0102 | 0.4351  | 0.1800  |
| 371SOL | HW1 | 1146 | 2.124 | 1.227 | 0.485 | 0.9312  | -0.9517 | 0.5909  |
| 371SOL | HW2 | 1147 | 1.975 | 1.257 | 0.544 | 0.6334  | 1.1996  | -1.1226 |
| 372SOL | OW  | 1148 | 1.805 | 1.058 | 1.366 | -0.1739 | -0.0419 | 0.4905  |
| 372SOL | HW1 | 1149 | 1.844 | 1.134 | 1.315 | -0.4305 | 1.3341  | 2.2293  |
| 372SOL | HW2 | 1150 | 1.861 | 1.040 | 1.447 | -0.9165 | -0.7236 | 0.8663  |
| 373SOL | OW  | 1151 | 0.301 | 2.517 | 2.048 | -0.3386 | -0.3159 | 0.2703  |
| 373SOL | HW1 | 1152 | 0.353 | 2.486 | 2.127 | 3.1372  | -0.5188 | -1.8605 |
| 373SOL | HW2 | 1153 | 0.275 | 2.438 | 1.992 | -1.4801 | -0.0905 | 0.4742  |
| 374SOL | OW  | 1154 | 1.548 | 0.438 | 0.477 | 0.7529  | -0.0159 | 0.0681  |
| 374SOL | HW1 | 1155 | 1.579 | 0.417 | 0.384 | 1.8595  | 0.8056  | 0.2249  |
| 374SOL | HW2 | 1156 | 1.459 | 0.483 | 0.473 | -0.4081 | -2.2240 | -0.4154 |
| 375SOL | OW  | 1157 | 2.230 | 1.726 | 1.438 | 0.0961  | 0.1779  | -0.6144 |
| 375SOL | HW1 | 1158 | 2.321 | 1.766 | 1.451 | 0.5124  | -0.7359 | -0.6780 |
| 375SOL | HW2 | 1159 | 2.236 | 1.651 | 1.373 | -0.6714 | -0.0415 | -0.4388 |
| 376SOL | OW  | 1160 | 0.178 | 1.379 | 0.360 | 0.5265  | -0.5004 | 0.7602  |
| 376SOL | HW1 | 1161 | 0.128 | 1.313 | 0.304 | 0.6675  | -2.1312 | 2.4627  |
| 376SOL | HW2 | 1162 | 0.163 | 1.359 | 0.456 | -0.7300 | 2.9948  | 1.4312  |
| 377SOL | OW  | 1163 | 2.270 | 0.887 | 1.942 | 0.5062  | 0.0123  | -0.1081 |
| 377SOL | HW1 | 1164 | 2.299 | 0.930 | 1.856 | -0.6372 | 0.8107  | -0.1111 |
| 377SOL | HW2 | 1165 | 2.351 | 0.867 | 1.997 | 1.1064  | 2.0638  | -0.1539 |

|        |          |        |       |        |         |         |         |
|--------|----------|--------|-------|--------|---------|---------|---------|
| 378SOL | OW 1166  | 3.084  | 1.183 | 1.929  | -0.1837 | 0.0020  | -0.1209 |
| 378SOL | HW1 1167 | 2.992  | 1.191 | 1.969  | -0.8768 | -1.6761 | -1.2758 |
| 378SOL | HW2 1168 | 3.110  | 1.087 | 1.924  | 1.2809  | 0.3935  | -0.6537 |
| 379SOL | OW 1169  | 1.529  | 0.775 | 2.014  | 0.2572  | 0.2841  | 0.9707  |
| 379SOL | HW1 1170 | 1.486  | 0.751 | 2.101  | -0.1343 | -0.5644 | 0.5586  |
| 379SOL | HW2 1171 | 1.502  | 0.708 | 1.945  | 1.2597  | 0.4541  | 0.4041  |
| 380SOL | OW 1172  | 1.047  | 0.826 | 1.404  | 0.3900  | 0.2914  | 0.2465  |
| 380SOL | HW1 1173 | 0.980  | 0.886 | 1.361  | -0.3729 | -1.2612 | -0.8159 |
| 380SOL | HW2 1174 | 1.125  | 0.880 | 1.435  | -0.5651 | 1.8997  | -0.0620 |
| 381SOL | OW 1175  | 0.312  | 0.312 | 0.020  | -0.8428 | 0.4390  | -0.0673 |
| 381SOL | HW1 1176 | 0.389  | 0.251 | 0.039  | -1.6336 | -0.5482 | 0.0719  |
| 381SOL | HW2 1177 | 0.232  | 0.257 | -0.005 | -1.6545 | 1.4152  | 0.3364  |
| 382SOL | OW 1178  | -0.014 | 2.639 | 1.242  | 0.0215  | -0.6803 | -0.2117 |
| 382SOL | HW1 1179 | -0.003 | 2.624 | 1.340  | 2.2168  | 0.9932  | -0.1200 |
| 382SOL | HW2 1180 | 0.076  | 2.652 | 1.200  | -0.9403 | -0.2273 | -2.2634 |
| 383SOL | OW 1181  | 2.013  | 3.089 | 0.633  | 0.3438  | -0.5717 | -0.2729 |
| 383SOL | HW1 1182 | 2.041  | 2.994 | 0.627  | -2.5571 | -1.4558 | -1.8183 |
| 383SOL | HW2 1183 | 2.079  | 3.147 | 0.586  | 1.8734  | -1.8251 | 0.2267  |
| 384SOL | OW 1184  | 1.990  | 2.689 | 1.545  | -0.6203 | 0.7012  | 0.6533  |
| 384SOL | HW1 1185 | 1.951  | 2.678 | 1.636  | 0.6874  | -0.6302 | 1.0932  |
| 384SOL | HW2 1186 | 2.068  | 2.752 | 1.548  | -1.1243 | 1.3547  | 0.2735  |
| 385SOL | OW 1187  | 2.123  | 0.584 | 0.975  | -0.4645 | -0.1517 | -0.1420 |
| 385SOL | HW1 1188 | 2.042  | 0.628 | 0.936  | -0.8747 | 2.2092  | 2.9822  |
| 385SOL | HW2 1189 | 2.175  | 0.539 | 0.902  | -2.0788 | 2.2469  | -3.0136 |
| 386SOL | OW 1190  | 0.944  | 2.741 | 0.771  | 0.0699  | 0.0057  | 0.0757  |
| 386SOL | HW1 1191 | 0.861  | 2.695 | 0.803  | -0.2621 | 0.2886  | -0.3740 |
| 386SOL | HW2 1192 | 1.021  | 2.677 | 0.775  | -0.2721 | -0.4159 | 0.0012  |
| 387SOL | OW 1193  | 1.813  | 1.583 | 0.238  | -0.2461 | -0.1435 | 0.2953  |
| 387SOL | HW1 1194 | 1.808  | 1.642 | 0.319  | -0.0552 | 1.1373  | -0.5889 |
| 387SOL | HW2 1195 | 1.900  | 1.599 | 0.191  | -0.5672 | -0.4983 | -0.4307 |
| 388SOL | OW 1196  | 1.211  | 2.379 | 1.998  | 0.5666  | 0.0263  | -0.2576 |
| 388SOL | HW1 1197 | 1.245  | 2.398 | 2.090  | 0.0946  | -0.3183 | -0.0091 |
| 388SOL | HW2 1198 | 1.124  | 2.329 | 2.004  | -0.3436 | 1.4733  | -0.8623 |
| 389SOL | OW 1199  | 2.630  | 0.673 | 1.391  | 0.1459  | -0.0967 | 0.1537  |
| 389SOL | HW1 1200 | 2.651  | 0.610 | 1.317  | 0.5618  | 1.0405  | -0.7267 |
| 389SOL | HW2 1201 | 2.682  | 0.647 | 1.472  | 1.0478  | -0.3303 | -0.4830 |
| 390SOL | OW 1202  | 1.639  | 2.821 | 1.393  | 0.8298  | 0.2978  | 0.2922  |
| 390SOL | HW1 1203 | 1.659  | 2.791 | 1.300  | -1.7143 | -4.2481 | 0.9454  |
| 390SOL | HW2 1204 | 1.589  | 2.908 | 1.389  | 1.5134  | 0.6724  | -2.4641 |
| 391SOL | OW 1205  | 1.800  | 2.467 | 0.523  | -0.1844 | 0.2282  | -0.0345 |
| 391SOL | HW1 1206 | 1.872  | 2.489 | 0.588  | -0.0346 | 1.4142  | -0.5698 |
| 391SOL | HW2 1207 | 1.826  | 2.387 | 0.469  | -0.4178 | -0.9114 | 1.5028  |
| 392SOL | OW 1208  | 1.188  | 2.855 | 1.887  | -0.2949 | 0.3801  | -0.2326 |
| 392SOL | HW1 1209 | 1.104  | 2.802 | 1.891  | -0.2418 | 0.3678  | 1.1345  |
| 392SOL | HW2 1210 | 1.177  | 2.939 | 1.939  | 0.5496  | 0.3636  | -0.0111 |
| 393SOL | OW 1211  | 2.266  | 1.542 | 1.864  | -0.0251 | -0.1669 | -0.1229 |
| 393SOL | HW1 1212 | 2.355  | 1.531 | 1.908  | 0.5892  | -0.3030 | -1.3314 |
| 393SOL | HW2 1213 | 2.258  | 1.635 | 1.828  | -1.3097 | 0.5587  | 1.8698  |
| 394SOL | OW 1214  | 0.864  | 0.364 | 0.104  | 0.3125  | 0.1460  | 0.2301  |
| 394SOL | HW1 1215 | 0.844  | 0.456 | 0.139  | 0.3346  | 0.3736  | -0.3592 |
| 394SOL | HW2 1216 | 0.865  | 0.365 | 0.004  | -2.5760 | -1.0482 | 0.0656  |
| 395SOL | OW 1217  | 0.732  | 2.881 | 0.183  | -0.1456 | -0.2757 | -0.3558 |

|        |          |       |       |        |         |         |         |
|--------|----------|-------|-------|--------|---------|---------|---------|
| 395SOL | HW1 1218 | 0.639 | 2.900 | 0.213  | -0.0848 | -0.5257 | -0.0089 |
| 395SOL | HW2 1219 | 0.759 | 2.789 | 0.211  | 1.2498  | 0.7870  | 2.2096  |
| 396SOL | OW 1220  | 2.522 | 1.596 | 0.034  | 0.0431  | 0.3755  | -0.2232 |
| 396SOL | HW1 1221 | 2.508 | 1.689 | -0.001 | -1.7022 | 0.6755  | 1.1159  |
| 396SOL | HW2 1222 | 2.618 | 1.584 | 0.061  | -0.1028 | 2.5534  | 1.5713  |
| 397SOL | OW 1223  | 1.057 | 1.619 | 0.420  | -0.1282 | -0.1213 | -0.2454 |
| 397SOL | HW1 1224 | 0.980 | 1.667 | 0.378  | -0.2869 | -0.4637 | -0.3456 |
| 397SOL | HW2 1225 | 1.085 | 1.543 | 0.362  | 2.6941  | 2.1453  | -2.1448 |
| 398SOL | OW 1226  | 1.726 | 0.838 | 0.763  | -0.6186 | 0.3272  | -0.1308 |
| 398SOL | HW1 1227 | 1.746 | 0.920 | 0.709  | -1.6612 | 0.1425  | -0.8363 |
| 398SOL | HW2 1228 | 1.698 | 0.864 | 0.855  | -1.7887 | 0.8324  | -0.6087 |
| 399SOL | OW 1229  | 1.798 | 1.883 | 1.088  | -0.4137 | -0.0311 | -0.3770 |
| 399SOL | HW1 1230 | 1.804 | 1.846 | 1.181  | -1.5376 | 0.9808  | 0.1273  |
| 399SOL | HW2 1231 | 1.776 | 1.809 | 1.024  | -0.5398 | -0.5940 | 0.3013  |
| 400SOL | OW 1232  | 2.743 | 1.274 | 0.134  | -0.9714 | -0.4032 | 0.3629  |
| 400SOL | HW1 1233 | 2.725 | 1.206 | 0.064  | 2.3984  | 1.3870  | -2.5882 |
| 400SOL | HW2 1234 | 2.824 | 1.247 | 0.187  | -0.4123 | 0.6201  | 0.0634  |
| 401SOL | OW 1235  | 2.470 | 1.384 | 1.582  | -0.2627 | 0.2015  | -0.1846 |
| 401SOL | HW1 1236 | 2.510 | 1.475 | 1.580  | 2.8018  | -0.9975 | -2.7224 |
| 401SOL | HW2 1237 | 2.523 | 1.325 | 1.643  | -0.1701 | -0.6490 | -1.0636 |
| 402SOL | OW 1238  | 2.689 | 0.301 | 2.112  | -0.2142 | 0.6559  | -0.1626 |
| 402SOL | HW1 1239 | 2.713 | 0.271 | 2.204  | 0.3913  | 2.0011  | 0.1564  |
| 402SOL | HW2 1240 | 2.600 | 0.347 | 2.114  | 0.7178  | 2.5771  | 0.2294  |
| 403SOL | OW 1241  | 1.790 | 2.919 | 0.582  | 0.1103  | 0.0915  | -0.2600 |
| 403SOL | HW1 1242 | 1.808 | 3.012 | 0.614  | -0.4124 | 0.0073  | 0.2949  |
| 403SOL | HW2 1243 | 1.810 | 2.853 | 0.654  | -1.4500 | -0.0688 | 0.0628  |
| 404SOL | OW 1244  | 2.361 | 2.099 | 0.182  | 0.7991  | -0.1240 | -0.5772 |
| 404SOL | HW1 1245 | 2.428 | 2.076 | 0.252  | 0.2718  | -0.6661 | -0.2533 |
| 404SOL | HW2 1246 | 2.276 | 2.129 | 0.225  | 0.5538  | -0.2267 | -0.9845 |
| 405SOL | OW 1247  | 0.960 | 1.091 | 1.209  | 0.4167  | -0.3946 | -0.0272 |
| 405SOL | HW1 1248 | 1.032 | 1.131 | 1.265  | -0.6059 | 0.7943  | 0.4954  |
| 405SOL | HW2 1249 | 0.995 | 1.071 | 1.118  | 1.6891  | -0.9027 | 0.5541  |
| 406SOL | OW 1250  | 0.269 | 1.162 | 1.925  | 0.3611  | -0.2294 | -0.1133 |
| 406SOL | HW1 1251 | 0.173 | 1.167 | 1.895  | 0.5319  | -0.1193 | -0.6613 |
| 406SOL | HW2 1252 | 0.329 | 1.174 | 1.845  | 0.8354  | -1.8817 | -0.0377 |
| 407SOL | OW 1253  | 1.121 | 1.198 | 1.956  | 0.2927  | 0.2317  | 0.0370  |
| 407SOL | HW1 1254 | 1.069 | 1.278 | 1.926  | 0.1676  | -0.4245 | -1.5664 |
| 407SOL | HW2 1255 | 1.216 | 1.225 | 1.973  | -0.0821 | 1.0165  | 1.0436  |
| 408SOL | OW 1256  | 0.902 | 1.415 | 1.876  | -0.1573 | 0.1535  | 0.5313  |
| 408SOL | HW1 1257 | 0.803 | 1.399 | 1.878  | -0.7015 | 3.0258  | 1.6704  |
| 408SOL | HW2 1258 | 0.920 | 1.511 | 1.855  | 2.5256  | -0.7194 | -1.7139 |
| 409SOL | OW 1259  | 2.187 | 0.366 | 0.543  | 0.2764  | 0.9117  | -0.4347 |
| 409SOL | HW1 1260 | 2.093 | 0.402 | 0.544  | 0.6711  | 1.9931  | 0.1080  |
| 409SOL | HW2 1261 | 2.188 | 0.275 | 0.503  | -1.3274 | 0.0243  | 1.3703  |
| 410SOL | OW 1262  | 1.677 | 2.486 | 1.934  | -0.2845 | -0.5705 | 0.1802  |
| 410SOL | HW1 1263 | 1.634 | 2.410 | 1.982  | -0.2261 | 0.2265  | 1.5589  |
| 410SOL | HW2 1264 | 1.736 | 2.536 | 1.998  | 2.1612  | -1.1996 | -1.4572 |
| 411SOL | OW 1265  | 1.355 | 0.091 | 0.798  | -0.2192 | 0.5413  | -0.0612 |
| 411SOL | HW1 1266 | 1.387 | 0.001 | 0.767  | -0.9761 | 0.7346  | -1.4487 |
| 411SOL | HW2 1267 | 1.402 | 0.162 | 0.747  | -1.3084 | 0.8722  | -0.6274 |
| 412SOL | OW 1268  | 1.924 | 2.904 | 0.320  | -0.1619 | -0.0691 | -0.5929 |
| 412SOL | HW1 1269 | 1.879 | 2.912 | 0.409  | -2.2408 | -1.1103 | -1.4967 |

|        |          |       |       |       |         |         |         |
|--------|----------|-------|-------|-------|---------|---------|---------|
| 412SOL | HW2 1270 | 1.907 | 2.987 | 0.267 | 0.2556  | 0.1442  | -0.4013 |
| 413SOL | OW 1271  | 0.580 | 0.578 | 0.389 | -0.0006 | -0.0659 | -0.2152 |
| 413SOL | HW1 1272 | 0.489 | 0.551 | 0.356 | 0.0464  | 1.2177  | -1.4630 |
| 413SOL | HW2 1273 | 0.570 | 0.634 | 0.472 | -0.2821 | -0.7694 | 0.2331  |
| 414SOL | OW 1274  | 0.937 | 0.552 | 1.301 | 0.0822  | -0.4326 | 0.3764  |
| 414SOL | HW1 1275 | 0.859 | 0.533 | 1.361 | 0.4398  | 0.2714  | 1.0876  |
| 414SOL | HW2 1276 | 1.019 | 0.566 | 1.357 | 0.8289  | -1.5845 | -0.3707 |
| 415SOL | OW 1277  | 2.131 | 2.704 | 1.932 | 0.4510  | 0.1188  | -0.0140 |
| 415SOL | HW1 1278 | 2.211 | 2.765 | 1.933 | 0.2823  | 0.3735  | 1.4952  |
| 415SOL | HW2 1279 | 2.133 | 2.645 | 2.013 | -0.0846 | -0.9806 | -0.7739 |
| 416SOL | OW 1280  | 1.779 | 1.269 | 0.221 | -0.1011 | -0.5354 | 0.3714  |
| 416SOL | HW1 1281 | 1.745 | 1.246 | 0.312 | -0.4048 | -1.5917 | 0.0114  |
| 416SOL | HW2 1282 | 1.749 | 1.361 | 0.196 | -0.7587 | -0.5724 | 0.9896  |
| 417SOL | OW 1283  | 2.887 | 2.695 | 0.472 | -0.1415 | 0.2320  | -0.5232 |
| 417SOL | HW1 1284 | 2.965 | 2.633 | 0.476 | -1.3434 | -1.3271 | -0.0184 |
| 417SOL | HW2 1285 | 2.901 | 2.770 | 0.537 | -0.1344 | -1.3915 | 1.4751  |
| 418SOL | OW 1286  | 2.513 | 2.801 | 1.876 | 0.2118  | -0.2055 | -0.5274 |
| 418SOL | HW1 1287 | 2.580 | 2.761 | 1.938 | -0.1409 | -1.2069 | -0.7683 |
| 418SOL | HW2 1288 | 2.498 | 2.739 | 1.798 | -1.4963 | -0.3704 | -0.1245 |
| 419SOL | OW 1289  | 2.983 | 3.023 | 1.896 | 0.1861  | 0.4829  | -0.2485 |
| 419SOL | HW1 1290 | 2.948 | 2.995 | 1.807 | -1.3042 | 3.3260  | -0.6775 |
| 419SOL | HW2 1291 | 3.043 | 3.103 | 1.884 | -2.4444 | 2.8920  | 1.4076  |
| 420SOL | OW 1292  | 1.257 | 2.006 | 0.592 | 0.4097  | -0.0879 | 0.0353  |
| 420SOL | HW1 1293 | 1.248 | 1.970 | 0.685 | 1.3101  | 1.0124  | 0.5693  |
| 420SOL | HW2 1294 | 1.213 | 2.095 | 0.587 | -0.5529 | -0.6006 | -0.8932 |
| 421SOL | OW 1295  | 0.925 | 2.398 | 0.382 | -0.0863 | 0.6772  | -0.4018 |
| 421SOL | HW1 1296 | 0.874 | 2.458 | 0.443 | -0.4648 | 1.0643  | -1.0866 |
| 421SOL | HW2 1297 | 1.003 | 2.359 | 0.431 | -0.3993 | 0.9524  | 0.3301  |
| 422SOL | OW 1298  | 2.755 | 0.774 | 0.682 | -0.6930 | 0.2467  | 0.2765  |
| 422SOL | HW1 1299 | 2.680 | 0.780 | 0.616 | 0.3561  | -0.6035 | -1.0498 |
| 422SOL | HW2 1300 | 2.811 | 0.856 | 0.676 | -0.5240 | 0.1135  | 0.0001  |
| 423SOL | OW 1301  | 2.952 | 2.540 | 2.201 | -0.2296 | -0.2601 | -0.5473 |
| 423SOL | HW1 1302 | 2.988 | 2.613 | 2.142 | -0.8600 | 1.2732  | 0.9107  |
| 423SOL | HW2 1303 | 2.998 | 2.454 | 2.178 | -0.3725 | 0.2835  | -3.1757 |
| 424SOL | OW 1304  | 0.235 | 0.284 | 1.830 | -0.8119 | -0.6219 | -0.3083 |
| 424SOL | HW1 1305 | 0.311 | 0.298 | 1.894 | 1.0679  | 0.8053  | -2.6647 |
| 424SOL | HW2 1306 | 0.219 | 0.368 | 1.778 | -3.2720 | -1.2638 | -0.7372 |
| 425SOL | OW 1307  | 1.947 | 1.311 | 1.355 | -0.5433 | -0.0660 | 0.2938  |
| 425SOL | HW1 1308 | 1.975 | 1.312 | 1.451 | -2.1467 | -2.9175 | 0.9118  |
| 425SOL | HW2 1309 | 2.027 | 1.307 | 1.296 | 0.4583  | -1.3194 | 1.6777  |
| 426SOL | OW 1310  | 0.535 | 0.598 | 1.740 | 0.5355  | -0.3362 | -0.1003 |
| 426SOL | HW1 1311 | 0.443 | 0.562 | 1.756 | 0.8876  | -1.4800 | -0.5141 |
| 426SOL | HW2 1312 | 0.599 | 0.554 | 1.804 | 0.6671  | 1.1887  | 0.8817  |
| 427SOL | OW 1313  | 3.024 | 0.014 | 0.614 | 0.3853  | 0.3293  | 0.1011  |
| 427SOL | HW1 1314 | 3.005 | 0.049 | 0.522 | 2.4591  | -1.3861 | -1.0668 |
| 427SOL | HW2 1315 | 3.049 | 0.089 | 0.674 | 1.1990  | 1.2687  | -1.3531 |
| 428SOL | OW 1316  | 0.810 | 1.317 | 1.264 | -0.3136 | -0.1571 | -0.0787 |
| 428SOL | HW1 1317 | 0.856 | 1.229 | 1.272 | 0.0468  | 0.1322  | 1.1217  |
| 428SOL | HW2 1318 | 0.732 | 1.308 | 1.201 | 1.3554  | -0.6310 | -2.1715 |
| 429SOL | OW 1319  | 3.018 | 1.498 | 0.724 | 0.9878  | 0.0068  | -0.5370 |
| 429SOL | HW1 1320 | 3.075 | 1.480 | 0.804 | -1.2180 | 2.0952  | 1.6851  |
| 429SOL | HW2 1321 | 3.008 | 1.597 | 0.712 | -1.4402 | -0.2604 | -1.2857 |

|        |          |       |        |       |         |         |         |
|--------|----------|-------|--------|-------|---------|---------|---------|
| 430SOL | OW 1322  | 0.598 | 0.036  | 1.551 | 0.1991  | 0.7362  | 0.0716  |
| 430SOL | HW1 1323 | 0.597 | 0.135  | 1.545 | -1.0945 | 0.6959  | -0.9129 |
| 430SOL | HW2 1324 | 0.517 | 0.004  | 1.599 | 2.1442  | 0.2229  | 3.3157  |
| 431SOL | OW 1325  | 2.711 | 2.989  | 0.082 | 0.2811  | -0.2477 | 0.4305  |
| 431SOL | HW1 1326 | 2.765 | 2.953  | 0.158 | 1.7703  | -0.6500 | -0.7719 |
| 431SOL | HW2 1327 | 2.641 | 2.922  | 0.056 | -1.3702 | 0.5710  | 2.4539  |
| 432SOL | OW 1328  | 2.174 | 1.104  | 1.561 | 0.1067  | 0.7440  | 0.1125  |
| 432SOL | HW1 1329 | 2.265 | 1.087  | 1.598 | -0.1419 | 1.5469  | 1.1455  |
| 432SOL | HW2 1330 | 2.138 | 1.189  | 1.600 | -1.6969 | -0.3320 | 0.9353  |
| 433SOL | OW 1331  | 1.827 | 3.058  | 1.252 | 0.3757  | -0.5118 | -0.0106 |
| 433SOL | HW1 1332 | 1.746 | 3.084  | 1.201 | -1.2641 | -0.8466 | 2.2725  |
| 433SOL | HW2 1333 | 1.847 | 3.126  | 1.322 | 2.9035  | 0.2288  | -1.3076 |
| 434SOL | OW 1334  | 2.486 | 1.548  | 2.027 | -0.0503 | 0.3448  | 0.3749  |
| 434SOL | HW1 1335 | 2.522 | 1.595  | 2.108 | 0.4201  | 2.1707  | -0.8231 |
| 434SOL | HW2 1336 | 2.514 | 1.598  | 1.945 | 0.6839  | -2.2234 | -1.0360 |
| 435SOL | OW 1337  | 0.962 | 2.785  | 0.503 | -0.1019 | -0.3561 | -0.4114 |
| 435SOL | HW1 1338 | 1.003 | 2.875  | 0.521 | 0.1698  | -0.1484 | -1.9187 |
| 435SOL | HW2 1339 | 0.926 | 2.747  | 0.588 | -0.0373 | 1.0886  | 0.2924  |
| 436SOL | OW 1340  | 2.554 | 0.043  | 0.206 | -0.3350 | 0.0785  | -0.0348 |
| 436SOL | HW1 1341 | 2.455 | 0.027  | 0.207 | -0.4564 | 0.7261  | -0.5842 |
| 436SOL | HW2 1342 | 2.597 | -0.022 | 0.143 | -0.8907 | 2.0684  | -2.6620 |
| 437SOL | OW 1343  | 2.038 | 1.898  | 1.859 | 0.0699  | -0.1634 | -0.0975 |
| 437SOL | HW1 1344 | 1.950 | 1.930  | 1.823 | -0.5513 | -0.1583 | 1.3521  |
| 437SOL | HW2 1345 | 2.081 | 1.838  | 1.792 | -0.1617 | 1.2748  | -1.5992 |
| 438SOL | OW 1346  | 1.651 | 1.146  | 0.647 | -0.8313 | -0.1144 | 0.8606  |
| 438SOL | HW1 1347 | 1.639 | 1.225  | 0.587 | 0.1107  | -1.7383 | -1.6469 |
| 438SOL | HW2 1348 | 1.709 | 1.171  | 0.725 | -0.0791 | 1.5192  | -0.1897 |
| 439SOL | OW 1349  | 0.793 | 1.864  | 1.730 | -0.5304 | -0.4478 | 0.7231  |
| 439SOL | HW1 1350 | 0.769 | 1.782  | 1.678 | 0.5719  | -2.1101 | 2.6558  |
| 439SOL | HW2 1351 | 0.834 | 1.931  | 1.669 | -2.3055 | -0.9293 | -1.0848 |
| 440SOL | OW 1352  | 2.785 | 2.551  | 1.780 | -0.4978 | -0.5199 | -0.2121 |
| 440SOL | HW1 1353 | 2.776 | 2.594  | 1.870 | -0.9034 | -0.1419 | -0.4273 |
| 440SOL | HW2 1354 | 2.694 | 2.533  | 1.742 | -0.3504 | 0.4292  | -1.0649 |
| 441SOL | OW 1355  | 3.021 | 1.512  | 1.263 | 0.3661  | 0.2081  | -0.2593 |
| 441SOL | HW1 1356 | 3.008 | 1.587  | 1.198 | 0.2706  | 0.2548  | -0.1857 |
| 441SOL | HW2 1357 | 3.016 | 1.425  | 1.214 | -2.1287 | 0.1185  | 0.0276  |
| 442SOL | OW 1358  | 0.354 | 0.431  | 0.295 | -0.3412 | -0.4338 | 0.0048  |
| 442SOL | HW1 1359 | 0.289 | 0.414  | 0.370 | 0.0212  | 1.0528  | 0.6983  |
| 442SOL | HW2 1360 | 0.311 | 0.409  | 0.208 | -1.0036 | -1.5715 | 0.5958  |
| 443SOL | OW 1361  | 2.062 | 0.156  | 1.455 | -0.0674 | 0.1773  | -0.2783 |
| 443SOL | HW1 1362 | 2.007 | 0.184  | 1.376 | -0.4521 | 0.7308  | 0.1805  |
| 443SOL | HW2 1363 | 2.041 | 0.061  | 1.477 | -1.4859 | 0.6175  | 0.4067  |
| 444SOL | OW 1364  | 2.650 | 0.287  | 0.174 | 0.2461  | -0.3048 | -0.3663 |
| 444SOL | HW1 1365 | 2.713 | 0.313  | 0.246 | -0.6260 | -0.2144 | 0.3808  |
| 444SOL | HW2 1366 | 2.629 | 0.190  | 0.181 | 1.0199  | -0.5500 | -1.1986 |
| 445SOL | OW 1367  | 0.176 | 1.018  | 1.612 | 0.0608  | -0.2881 | -0.6528 |
| 445SOL | HW1 1368 | 0.151 | 1.113  | 1.630 | -1.6600 | -0.8595 | 0.1929  |
| 445SOL | HW2 1369 | 0.268 | 1.014  | 1.573 | 0.5355  | 1.6571  | 0.1675  |
| 446SOL | OW 1370  | 0.280 | 0.840  | 0.850 | 0.1965  | -0.6197 | 0.4453  |
| 446SOL | HW1 1371 | 0.246 | 0.786  | 0.772 | -0.2623 | 0.7656  | -0.3506 |
| 446SOL | HW2 1372 | 0.376 | 0.861  | 0.835 | -0.1712 | 0.5949  | -0.3343 |
| 447SOL | OW 1373  | 1.766 | 0.210  | 1.546 | 0.7049  | -0.4381 | -0.1334 |

|        |     |      |       |        |       |         |         |         |
|--------|-----|------|-------|--------|-------|---------|---------|---------|
| 447SOL | HW1 | 1374 | 1.733 | 0.117  | 1.562 | -0.3957 | -0.6528 | -3.0006 |
| 447SOL | HW2 | 1375 | 1.782 | 0.223  | 1.448 | 0.7122  | 2.4254  | 0.1684  |
| 448SOL | OW  | 1376 | 3.103 | 0.052  | 1.598 | -0.0045 | 0.4465  | 0.2733  |
| 448SOL | HW1 | 1377 | 3.020 | 0.088  | 1.555 | 0.0951  | 0.6373  | 0.2357  |
| 448SOL | HW2 | 1378 | 3.142 | -0.020 | 1.541 | 0.2782  | 0.8887  | -0.1006 |
| 449SOL | OW  | 1379 | 2.875 | 1.458  | 1.703 | 0.3798  | 0.2546  | 1.0509  |
| 449SOL | HW1 | 1380 | 2.883 | 1.493  | 1.796 | 0.6245  | 0.6171  | 0.8947  |
| 449SOL | HW2 | 1381 | 2.825 | 1.371  | 1.704 | -1.2773 | 1.1647  | 1.3227  |
| 450SOL | OW  | 1382 | 1.848 | 2.674  | 2.049 | -0.0985 | -0.3802 | -0.0817 |
| 450SOL | HW1 | 1383 | 1.876 | 2.759  | 2.095 | 1.2252  | -0.2161 | -1.1393 |
| 450SOL | HW2 | 1384 | 1.917 | 2.604  | 2.065 | 1.2399  | 0.1384  | -3.0586 |
| 451SOL | OW  | 1385 | 1.286 | 1.266  | 1.043 | -0.5835 | -0.0168 | 0.6674  |
| 451SOL | HW1 | 1386 | 1.286 | 1.263  | 1.143 | 0.8331  | 1.6850  | 0.7635  |
| 451SOL | HW2 | 1387 | 1.191 | 1.269  | 1.010 | -1.0984 | 2.2513  | 2.1198  |
| 452SOL | OW  | 1388 | 2.815 | 2.904  | 2.061 | 0.1951  | 0.5059  | -0.7163 |
| 452SOL | HW1 | 1389 | 2.721 | 2.914  | 2.094 | -0.0769 | 0.7533  | -1.5613 |
| 452SOL | HW2 | 1390 | 2.844 | 2.989  | 2.016 | -0.6100 | -0.8513 | -4.0637 |
| 453SOL | OW  | 1391 | 0.455 | 2.184  | 1.200 | -0.5349 | -0.2409 | -0.0281 |
| 453SOL | HW1 | 1392 | 0.508 | 2.189  | 1.285 | 1.7596  | -0.4989 | -1.3543 |
| 453SOL | HW2 | 1393 | 0.373 | 2.240  | 1.210 | 0.8081  | 1.6102  | 1.5957  |
| 454SOL | OW  | 1394 | 0.736 | 0.029  | 0.690 | -0.3538 | -0.0924 | 0.3129  |
| 454SOL | HW1 | 1395 | 0.812 | -0.029 | 0.718 | 0.0071  | -0.9324 | -2.1535 |
| 454SOL | HW2 | 1396 | 0.749 | 0.057  | 0.595 | -2.5499 | 0.7107  | 0.1924  |
| 455SOL | OW  | 1397 | 0.691 | 0.256  | 2.007 | 0.3071  | -0.1769 | 0.2175  |
| 455SOL | HW1 | 1398 | 0.597 | 0.256  | 2.041 | 0.9540  | -2.5018 | 2.3317  |
| 455SOL | HW2 | 1399 | 0.704 | 0.178  | 1.945 | 1.2544  | -1.0396 | 1.4539  |
| 456SOL | OW  | 1400 | 2.254 | 1.782  | 1.725 | 0.2104  | 0.8463  | 0.1001  |
| 456SOL | HW1 | 1401 | 2.351 | 1.804  | 1.730 | 0.4940  | -0.1978 | -0.4657 |
| 456SOL | HW2 | 1402 | 2.227 | 1.770  | 1.630 | -0.1153 | -0.3482 | 0.3241  |
| 457SOL | OW  | 1403 | 2.535 | 2.348  | 1.741 | 0.0674  | 0.3323  | -0.5831 |
| 457SOL | HW1 | 1404 | 2.574 | 2.298  | 1.818 | -1.3513 | 0.0736  | -0.0044 |
| 457SOL | HW2 | 1405 | 2.442 | 2.316  | 1.724 | -0.0570 | 1.2048  | -1.6566 |
| 458SOL | OW  | 1406 | 3.055 | 0.957  | 0.308 | -0.0980 | -0.0890 | 0.1539  |
| 458SOL | HW1 | 1407 | 2.974 | 0.901  | 0.290 | -1.9033 | 1.9000  | 1.6125  |
| 458SOL | HW2 | 1408 | 3.071 | 0.963  | 0.406 | 2.6149  | -1.3841 | -0.1166 |
| 459SOL | OW  | 1409 | 1.312 | 2.228  | 0.376 | 0.7488  | -0.0387 | 0.2461  |
| 459SOL | HW1 | 1410 | 1.392 | 2.270  | 0.418 | 0.7279  | -1.3541 | 1.6814  |
| 459SOL | HW2 | 1411 | 1.241 | 2.213  | 0.446 | 0.2756  | -1.2688 | -0.4568 |
| 460SOL | OW  | 1412 | 0.816 | 2.928  | 1.876 | 0.1986  | 0.4040  | 0.6070  |
| 460SOL | HW1 | 1413 | 0.900 | 2.874  | 1.866 | -0.5824 | -0.7816 | 0.2136  |
| 460SOL | HW2 | 1414 | 0.795 | 2.938  | 1.973 | 1.5747  | 2.0138  | 0.7906  |
| 461SOL | OW  | 1415 | 0.138 | 3.006  | 0.972 | -0.4414 | 0.0993  | 0.1149  |
| 461SOL | HW1 | 1416 | 0.136 | 3.060  | 1.055 | -1.8873 | 1.6975  | -0.8917 |
| 461SOL | HW2 | 1417 | 0.231 | 2.974  | 0.955 | 0.1693  | 1.0265  | 1.5213  |
| 462SOL | OW  | 1418 | 2.181 | 2.700  | 0.725 | -0.0288 | 0.6424  | -0.1473 |
| 462SOL | HW1 | 1419 | 2.151 | 2.773  | 0.787 | -2.0299 | 0.6317  | -1.0008 |
| 462SOL | HW2 | 1420 | 2.179 | 2.734  | 0.631 | -0.4052 | -0.3152 | -0.5027 |
| 463SOL | OW  | 1421 | 1.082 | 3.040  | 0.551 | -0.4747 | 0.0148  | 0.3850  |
| 463SOL | HW1 | 1422 | 1.117 | 3.133  | 0.536 | 2.0446  | -0.5470 | 2.2175  |
| 463SOL | HW2 | 1423 | 1.149 | 2.973  | 0.520 | -1.6937 | -1.2339 | 0.3048  |
| 464SOL | OW  | 1424 | 1.990 | 1.543  | 0.712 | 0.0656  | 0.7319  | 0.7431  |
| 464SOL | HW1 | 1425 | 2.004 | 1.474  | 0.782 | -0.1769 | 0.0814  | 0.1638  |



|        |          |       |       |       |         |         |         |
|--------|----------|-------|-------|-------|---------|---------|---------|
| 464SOL | HW2 1426 | 2.076 | 1.591 | 0.694 | 0.2672  | 0.4859  | 1.0416  |
| 465SOL | OW 1427  | 2.945 | 2.278 | 0.017 | 0.0768  | 0.3774  | 0.2430  |
| 465SOL | HW1 1428 | 2.951 | 2.364 | 0.068 | 1.3553  | 0.8904  | -0.7062 |
| 465SOL | HW2 1429 | 2.943 | 2.202 | 0.082 | -1.2229 | 1.1023  | 1.1061  |
| 466SOL | OW 1430  | 0.169 | 0.726 | 0.635 | 0.2309  | 0.0890  | -0.5450 |
| 466SOL | HW1 1431 | 0.161 | 0.700 | 0.538 | -1.4059 | -1.1462 | -0.1308 |
| 466SOL | HW2 1432 | 0.167 | 0.643 | 0.691 | -0.0175 | 0.8576  | 0.6057  |
| 467SOL | OW 1433  | 2.232 | 1.439 | 0.852 | 0.5655  | 0.1291  | -0.8194 |
| 467SOL | HW1 1434 | 2.311 | 1.406 | 0.904 | 0.3634  | 0.0049  | -0.5863 |
| 467SOL | HW2 1435 | 2.203 | 1.527 | 0.890 | -0.2148 | -0.4415 | -0.0414 |
| 468SOL | OW 1436  | 1.253 | 1.792 | 0.820 | -0.1404 | 0.4560  | -0.2905 |
| 468SOL | HW1 1437 | 1.225 | 1.699 | 0.796 | -0.3757 | 0.4761  | -0.0962 |
| 468SOL | HW2 1438 | 1.336 | 1.788 | 0.876 | 0.3791  | 0.4067  | -1.0506 |
| 469SOL | OW 1439  | 0.786 | 0.420 | 0.504 | -0.2268 | 0.0272  | 0.0546  |
| 469SOL | HW1 1440 | 0.756 | 0.362 | 0.580 | 0.8559  | 1.3119  | 1.5098  |
| 469SOL | HW2 1441 | 0.705 | 0.461 | 0.461 | -0.9502 | -1.7728 | -0.4207 |
| 470SOL | OW 1442  | 2.571 | 2.245 | 1.022 | 0.2001  | -0.1210 | 0.2395  |
| 470SOL | HW1 1443 | 2.572 | 2.304 | 0.942 | 3.0934  | -1.4335 | -0.8336 |
| 470SOL | HW2 1444 | 2.477 | 2.221 | 1.045 | -0.7768 | -2.1377 | -4.6918 |
| 471SOL | OW 1445  | 2.840 | 0.886 | 2.114 | 0.2477  | 0.5487  | 0.0848  |
| 471SOL | HW1 1446 | 2.829 | 0.984 | 2.100 | -1.0170 | 0.4226  | 0.0491  |
| 471SOL | HW2 1447 | 2.835 | 0.865 | 2.212 | -1.4452 | 0.3477  | -0.0054 |
| 472SOL | OW 1448  | 0.083 | 1.510 | 0.963 | 0.2867  | -0.1390 | 0.1026  |
| 472SOL | HW1 1449 | 0.103 | 1.441 | 1.033 | -0.8656 | -0.3838 | 0.2045  |
| 472SOL | HW2 1450 | 0.092 | 1.601 | 1.002 | 1.1662  | -0.2324 | 0.1431  |
| 473SOL | OW 1451  | 1.373 | 0.119 | 1.308 | 0.1335  | -0.6539 | 0.2963  |
| 473SOL | HW1 1452 | 1.322 | 0.161 | 1.383 | 0.9178  | 0.7597  | 0.0833  |
| 473SOL | HW2 1453 | 1.311 | 0.105 | 1.230 | -0.3391 | -0.6755 | 0.6689  |
| 474SOL | OW 1454  | 2.626 | 3.096 | 0.458 | 0.1373  | 0.3495  | 0.4512  |
| 474SOL | HW1 1455 | 2.615 | 3.135 | 0.366 | 1.4281  | -0.7742 | -0.2007 |
| 474SOL | HW2 1456 | 2.576 | 3.153 | 0.523 | -0.3352 | 1.5015  | -0.8523 |
| 475SOL | OW 1457  | 0.559 | 2.957 | 0.639 | -0.1484 | -0.0857 | -0.3240 |
| 475SOL | HW1 1458 | 0.589 | 2.865 | 0.663 | -0.7560 | -0.1935 | 0.0501  |
| 475SOL | HW2 1459 | 0.627 | 3.024 | 0.668 | 0.3043  | -0.4148 | -0.6159 |
| 476SOL | OW 1460  | 2.402 | 0.404 | 2.118 | 0.1747  | 0.0032  | -0.4891 |
| 476SOL | HW1 1461 | 2.347 | 0.398 | 2.034 | 1.3521  | -1.7991 | -1.1929 |
| 476SOL | HW2 1462 | 2.402 | 0.499 | 2.151 | -0.0390 | 0.8452  | -2.7220 |
| 477SOL | OW 1463  | 1.557 | 2.548 | 1.325 | 0.2891  | -0.1031 | -0.5286 |
| 477SOL | HW1 1464 | 1.625 | 2.486 | 1.365 | -0.1892 | -0.7534 | -0.7091 |
| 477SOL | HW2 1465 | 1.565 | 2.638 | 1.368 | 1.0486  | -0.2582 | -0.3209 |
| 478SOL | OW 1466  | 0.043 | 0.415 | 0.412 | -0.2924 | -0.7507 | -0.2462 |
| 478SOL | HW1 1467 | 0.106 | 0.437 | 0.486 | 0.4789  | -0.9880 | -0.8194 |
| 478SOL | HW2 1468 | 0.042 | 0.489 | 0.345 | -1.0245 | -0.5131 | 0.0151  |
| 479SOL | OW 1469  | 0.210 | 0.225 | 1.423 | 0.2969  | 0.3306  | 0.0371  |
| 479SOL | HW1 1470 | 0.160 | 0.170 | 1.356 | 0.3147  | 0.1630  | 0.1607  |
| 479SOL | HW2 1471 | 0.147 | 0.285 | 1.471 | -0.0292 | -0.9090 | 1.2143  |
| 480SOL | OW 1472  | 0.743 | 0.506 | 1.923 | -0.0685 | 0.0757  | 0.0997  |
| 480SOL | HW1 1473 | 0.723 | 0.416 | 1.963 | 0.8294  | -0.1051 | 0.1672  |
| 480SOL | HW2 1474 | 0.742 | 0.576 | 1.994 | 0.9113  | -0.1498 | 0.3530  |
| 481SOL | OW 1475  | 2.164 | 1.742 | 0.590 | 0.1429  | -0.0100 | 0.1671  |
| 481SOL | HW1 1476 | 2.128 | 1.669 | 0.532 | -0.7298 | -0.6742 | 1.4886  |
| 481SOL | HW2 1477 | 2.264 | 1.740 | 0.588 | 0.1531  | 0.1594  | -1.4821 |

|        |          |        |       |       |         |         |         |
|--------|----------|--------|-------|-------|---------|---------|---------|
| 482SOL | OW 1478  | 1.144  | 0.371 | 2.187 | 0.1244  | 0.1564  | -0.3148 |
| 482SOL | HW1 1479 | 1.156  | 0.387 | 2.089 | 0.0352  | 1.2966  | -0.1569 |
| 482SOL | HW2 1480 | 1.057  | 0.324 | 2.203 | -0.5362 | 1.2218  | -0.6883 |
| 483SOL | OW 1481  | 1.889  | 2.652 | 1.788 | 0.2805  | 0.1269  | -0.0020 |
| 483SOL | HW1 1482 | 1.824  | 2.578 | 1.774 | 1.4475  | -0.8454 | -0.4081 |
| 483SOL | HW2 1483 | 1.886  | 2.680 | 1.884 | -1.4201 | 0.7886  | -0.2074 |
| 484SOL | OW 1484  | 2.964  | 0.870 | 1.467 | -0.2014 | 0.0154  | -0.0947 |
| 484SOL | HW1 1485 | 3.056  | 0.880 | 1.506 | -1.0827 | 1.7742  | 1.6522  |
| 484SOL | HW2 1486 | 2.939  | 0.954 | 1.419 | -1.2831 | -0.0489 | 0.3306  |
| 485SOL | OW 1487  | 1.067  | 0.906 | 0.240 | 0.5336  | -0.3377 | -0.2959 |
| 485SOL | HW1 1488 | 1.048  | 0.828 | 0.300 | 0.0664  | 0.2118  | 0.2893  |
| 485SOL | HW2 1489 | 1.030  | 0.990 | 0.281 | 1.2278  | 0.2338  | -0.8019 |
| 486SOL | OW 1490  | 2.807  | 1.729 | 2.196 | 0.2299  | -0.0607 | 0.1510  |
| 486SOL | HW1 1491 | 2.830  | 1.817 | 2.153 | -0.6441 | -0.2067 | -0.6663 |
| 486SOL | HW2 1492 | 2.708  | 1.717 | 2.196 | 0.2593  | -0.4317 | 1.5396  |
| 487SOL | OW 1493  | 1.745  | 1.681 | 1.744 | -0.3798 | 0.5692  | -0.5495 |
| 487SOL | HW1 1494 | 1.809  | 1.696 | 1.668 | -0.0731 | 0.9400  | -0.2198 |
| 487SOL | HW2 1495 | 1.797  | 1.664 | 1.828 | -0.6959 | -1.5087 | -0.7286 |
| 488SOL | OW 1496  | 0.825  | 1.663 | 0.291 | -0.4137 | 0.6898  | -0.0848 |
| 488SOL | HW1 1497 | 0.823  | 1.670 | 0.191 | -1.2353 | 0.0988  | -0.1133 |
| 488SOL | HW2 1498 | 0.740  | 1.622 | 0.324 | 0.7048  | -1.1328 | 0.6891  |
| 489SOL | OW 1499  | 2.588  | 0.153 | 0.826 | 0.2947  | 0.0222  | 0.0688  |
| 489SOL | HW1 1500 | 2.672  | 0.113 | 0.865 | -0.4335 | -2.2682 | -0.5502 |
| 489SOL | HW2 1501 | 2.601  | 0.169 | 0.728 | 0.0755  | -0.1546 | 0.0107  |
| 490SOL | OW 1502  | 2.184  | 2.008 | 1.182 | 0.3110  | 0.3285  | -0.1236 |
| 490SOL | HW1 1503 | 2.127  | 1.977 | 1.106 | -0.1008 | -0.6586 | 0.5626  |
| 490SOL | HW2 1504 | 2.134  | 2.075 | 1.237 | -0.3287 | -0.7387 | 0.6350  |
| 491SOL | OW 1505  | 1.596  | 0.380 | 1.685 | -0.1248 | 0.0775  | 0.0431  |
| 491SOL | HW1 1506 | 1.568  | 0.461 | 1.635 | -2.0631 | -1.4132 | -1.4450 |
| 491SOL | HW2 1507 | 1.654  | 0.323 | 1.627 | -1.4023 | -1.0936 | -0.1283 |
| 492SOL | OW 1508  | 0.631  | 1.154 | 1.769 | -0.0300 | 0.1590  | -0.3570 |
| 492SOL | HW1 1509 | 0.723  | 1.155 | 1.731 | -0.1818 | -0.6936 | -0.7768 |
| 492SOL | HW2 1510 | 0.565  | 1.139 | 1.696 | -0.5794 | 1.5293  | -0.1742 |
| 493SOL | OW 1511  | 1.824  | 1.020 | 0.496 | -0.2526 | -0.2256 | 0.3164  |
| 493SOL | HW1 1512 | 1.766  | 1.079 | 0.552 | -2.2552 | 1.5418  | -3.2616 |
| 493SOL | HW2 1513 | 1.916  | 1.058 | 0.491 | -0.7883 | 1.1136  | 0.2476  |
| 494SOL | OW 1514  | 2.937  | 0.460 | 0.198 | -0.0113 | 0.2445  | -0.3640 |
| 494SOL | HW1 1515 | 2.888  | 0.421 | 0.276 | -1.1720 | -1.2059 | -1.7434 |
| 494SOL | HW2 1516 | 2.969  | 0.386 | 0.139 | -0.1278 | 1.3259  | -1.8243 |
| 495SOL | OW 1517  | 1.018  | 0.369 | 1.078 | 0.2453  | 0.5112  | 0.3685  |
| 495SOL | HW1 1518 | 1.048  | 0.277 | 1.102 | -1.2792 | 0.0790  | 0.7551  |
| 495SOL | HW2 1519 | 1.011  | 0.425 | 1.161 | 1.5620  | 1.1188  | 0.0886  |
| 496SOL | OW 1520  | 0.057  | 2.423 | 0.731 | -0.0110 | 0.4922  | 0.0679  |
| 496SOL | HW1 1521 | -0.023 | 2.371 | 0.704 | 0.9561  | -0.2285 | -1.5498 |
| 496SOL | HW2 1522 | 0.083  | 2.486 | 0.658 | 1.1856  | 0.3541  | 0.3389  |
| 497SOL | OW 1523  | 2.291  | 1.032 | 1.289 | -0.1674 | 0.2450  | 0.0289  |
| 497SOL | HW1 1524 | 2.245  | 1.041 | 1.377 | 0.1558  | -2.5257 | 0.5845  |
| 497SOL | HW2 1525 | 2.225  | 1.001 | 1.220 | 0.1659  | -0.6063 | 0.0727  |
| 498SOL | OW 1526  | 0.537  | 1.287 | 1.500 | -0.1556 | -0.4032 | 0.5938  |
| 498SOL | HW1 1527 | 0.452  | 1.301 | 1.551 | 0.2479  | -0.3376 | 1.2577  |
| 498SOL | HW2 1528 | 0.522  | 1.216 | 1.431 | -0.8383 | -0.1653 | 0.4822  |
| 499SOL | OW 1529  | 2.722  | 1.579 | 1.227 | 0.3463  | -0.2794 | 0.3209  |

|        |     |      |       |        |        |         |         |         |
|--------|-----|------|-------|--------|--------|---------|---------|---------|
| 499SOL | HW1 | 1530 | 2.804 | 1.590  | 1.283  | 0.0570  | 1.0642  | 0.5163  |
| 499SOL | HW2 | 1531 | 2.665 | 1.507  | 1.266  | 1.3456  | -1.1347 | 0.2612  |
| 500SOL | OW  | 1532 | 0.251 | 2.543  | 1.735  | 0.6507  | -0.1809 | -0.3420 |
| 500SOL | HW1 | 1533 | 0.255 | 2.545  | 1.835  | -0.3127 | -0.9694 | -0.2767 |
| 500SOL | HW2 | 1534 | 0.249 | 2.449  | 1.703  | 1.8265  | 0.0474  | -1.1680 |
| 501SOL | OW  | 1535 | 1.147 | 2.001  | 2.163  | -0.0753 | -0.0911 | -0.3466 |
| 501SOL | HW1 | 1536 | 1.108 | 1.953  | 2.242  | -1.2075 | -0.1685 | -0.9311 |
| 501SOL | HW2 | 1537 | 1.198 | 1.935  | 2.106  | 0.2909  | -0.1394 | 0.0325  |
| 502SOL | OW  | 1538 | 2.131 | 2.253  | 0.894  | -0.0520 | 0.1466  | -0.6702 |
| 502SOL | HW1 | 1539 | 2.161 | 2.256  | 0.989  | 0.5325  | 1.1028  | -0.8839 |
| 502SOL | HW2 | 1540 | 2.165 | 2.169  | 0.851  | 0.0808  | -0.0551 | -0.1786 |
| 503SOL | OW  | 1541 | 2.708 | 1.999  | 1.593  | 0.4327  | 0.3845  | -0.0101 |
| 503SOL | HW1 | 1542 | 2.679 | 2.094  | 1.582  | 0.1320  | 0.5153  | 1.6574  |
| 503SOL | HW2 | 1543 | 2.779 | 1.978  | 1.526  | -0.5678 | 1.3053  | -1.4035 |
| 504SOL | OW  | 1544 | 2.150 | -0.000 | 0.876  | -0.4224 | 0.6652  | 0.4001  |
| 504SOL | HW1 | 1545 | 2.066 | 0.053  | 0.863  | -0.1202 | 0.9147  | -0.5968 |
| 504SOL | HW2 | 1546 | 2.221 | 0.033  | 0.814  | -0.1174 | -0.6789 | -0.0080 |
| 505SOL | OW  | 1547 | 1.548 | 2.584  | 0.431  | -0.4591 | -0.5479 | 0.0185  |
| 505SOL | HW1 | 1548 | 1.527 | 2.505  | 0.373  | 1.7732  | -1.4597 | 0.3591  |
| 505SOL | HW2 | 1549 | 1.617 | 2.558  | 0.498  | -1.4189 | 1.0871  | 1.7036  |
| 506SOL | OW  | 1550 | 2.463 | 1.245  | 1.138  | -0.3073 | -0.2818 | -0.0229 |
| 506SOL | HW1 | 1551 | 2.467 | 1.151  | 1.171  | 1.2737  | 0.2981  | 1.6147  |
| 506SOL | HW2 | 1552 | 2.507 | 1.250  | 1.048  | 0.9647  | -0.8883 | 0.5407  |
| 507SOL | OW  | 1553 | 0.255 | 2.951  | 1.753  | -0.1694 | -0.0692 | -0.1505 |
| 507SOL | HW1 | 1554 | 0.256 | 3.042  | 1.712  | -0.6228 | 0.6278  | 1.3290  |
| 507SOL | HW2 | 1555 | 0.330 | 2.897  | 1.715  | 0.6477  | 1.2059  | -0.4153 |
| 508SOL | OW  | 1556 | 0.943 | 0.078  | 0.961  | 0.0358  | -0.5137 | -0.5114 |
| 508SOL | HW1 | 1557 | 0.947 | -0.004 | 0.904  | 0.0075  | -1.3168 | 0.6154  |
| 508SOL | HW2 | 1558 | 0.860 | 0.076  | 1.017  | 0.1061  | 0.2149  | -0.3741 |
| 509SOL | OW  | 1559 | 1.695 | 0.436  | 0.743  | 0.0032  | -0.0184 | -0.8685 |
| 509SOL | HW1 | 1560 | 1.648 | 0.366  | 0.689  | 0.6511  | -0.3220 | -1.0593 |
| 509SOL | HW2 | 1561 | 1.663 | 0.432  | 0.837  | -1.1663 | 0.5415  | -1.2190 |
| 510SOL | OW  | 1562 | 1.413 | 0.581  | 0.924  | 0.0517  | -0.1890 | -0.0881 |
| 510SOL | HW1 | 1563 | 1.452 | 0.652  | 0.864  | 1.1061  | -0.2776 | 0.4596  |
| 510SOL | HW2 | 1564 | 1.370 | 0.625  | 1.003  | -1.3095 | -0.0737 | -0.8726 |
| 511SOL | OW  | 1565 | 0.765 | 1.189  | 0.318  | 0.2282  | -0.2502 | -0.2431 |
| 511SOL | HW1 | 1566 | 0.693 | 1.253  | 0.292  | -0.3641 | -0.6970 | 0.2466  |
| 511SOL | HW2 | 1567 | 0.726 | 1.096  | 0.323  | 1.1394  | -0.6956 | -1.2599 |
| 512SOL | OW  | 1568 | 0.311 | 0.237  | 1.115  | 0.0927  | 0.1680  | -0.1919 |
| 512SOL | HW1 | 1569 | 0.230 | 0.211  | 1.167  | 0.0116  | -2.2505 | -1.3916 |
| 512SOL | HW2 | 1570 | 0.388 | 0.181  | 1.144  | 0.7111  | 0.6843  | -0.8142 |
| 513SOL | OW  | 1571 | 2.873 | 0.897  | 0.019  | 0.0336  | 0.4078  | 0.0118  |
| 513SOL | HW1 | 1572 | 2.886 | 0.874  | 0.116  | 0.4896  | -1.4263 | -0.4270 |
| 513SOL | HW2 | 1573 | 2.922 | 0.981  | -0.002 | -0.0878 | 0.8440  | 1.3822  |
| 514SOL | OW  | 1574 | 0.702 | 1.038  | 2.009  | 0.4108  | -0.7448 | -0.0881 |
| 514SOL | HW1 | 1575 | 0.800 | 1.018  | 2.002  | 0.0456  | -2.4138 | -1.0733 |
| 514SOL | HW2 | 1576 | 0.672 | 1.084  | 1.925  | 0.1746  | -1.1676 | -0.2425 |
| 515SOL | OW  | 1577 | 0.891 | 2.928  | 2.147  | -0.1855 | -0.3121 | 0.0779  |
| 515SOL | HW1 | 1578 | 0.896 | 3.025  | 2.170  | -1.8401 | 0.0723  | -0.9436 |
| 515SOL | HW2 | 1579 | 0.950 | 2.875  | 2.208  | 3.4329  | 1.6339  | -1.4495 |
| 516SOL | OW  | 1580 | 2.580 | 2.965  | 2.170  | 0.4128  | -0.3047 | 0.2088  |
| 516SOL | HW1 | 1581 | 2.492 | 2.917  | 2.167  | 1.1885  | -1.7321 | -1.6055 |

|        |     |      |       |        |       |         |         |         |
|--------|-----|------|-------|--------|-------|---------|---------|---------|
| 516SOL | HW2 | 1582 | 2.565 | 3.062  | 2.146 | -0.6958 | -0.4588 | 0.1986  |
| 517SOL | OW  | 1583 | 1.964 | 0.325  | 1.659 | 0.2039  | 0.1013  | -0.6113 |
| 517SOL | HW1 | 1584 | 1.873 | 0.286  | 1.651 | 0.5841  | -0.9001 | -0.2421 |
| 517SOL | HW2 | 1585 | 2.028 | 0.272  | 1.602 | 0.4900  | 1.0437  | -1.1970 |
| 518SOL | OW  | 1586 | 0.374 | 1.175  | 0.391 | -0.0085 | 0.6984  | -0.4485 |
| 518SOL | HW1 | 1587 | 0.293 | 1.234  | 0.391 | -0.1351 | 0.6571  | 2.5245  |
| 518SOL | HW2 | 1588 | 0.455 | 1.231  | 0.377 | -0.3220 | 1.2405  | -0.1607 |
| 519SOL | OW  | 1589 | 2.580 | 0.603  | 0.998 | -0.3671 | 0.0251  | -0.1597 |
| 519SOL | HW1 | 1590 | 2.611 | 0.531  | 1.060 | -1.3405 | -0.1244 | 0.1702  |
| 519SOL | HW2 | 1591 | 2.637 | 0.684  | 1.009 | -0.8282 | 0.1807  | 1.3027  |
| 520SOL | OW  | 1592 | 2.674 | 0.857  | 1.034 | -0.0816 | -0.4593 | -0.2549 |
| 520SOL | HW1 | 1593 | 2.637 | 0.887  | 1.123 | 1.3523  | -0.6659 | 0.4434  |
| 520SOL | HW2 | 1594 | 2.670 | 0.933  | 0.970 | 1.4272  | 0.5995  | 0.8309  |
| 521SOL | OW  | 1595 | 0.214 | 3.079  | 2.016 | 0.2701  | -0.0706 | -0.1723 |
| 521SOL | HW1 | 1596 | 0.218 | 2.987  | 1.977 | -2.6276 | 0.3292  | -1.6852 |
| 521SOL | HW2 | 1597 | 0.154 | 3.137  | 1.960 | 1.2461  | 2.5019  | 1.2554  |
| 522SOL | OW  | 1598 | 1.402 | 0.063  | 0.459 | -0.0674 | -0.0855 | -0.0629 |
| 522SOL | HW1 | 1599 | 1.370 | -0.024 | 0.498 | -1.4640 | -0.2368 | -1.4491 |
| 522SOL | HW2 | 1600 | 1.324 | 0.114  | 0.423 | 0.8898  | 1.1586  | -0.4559 |
| 523SOL | OW  | 1601 | 2.589 | 0.630  | 2.170 | -0.4337 | -0.4877 | -0.5193 |
| 523SOL | HW1 | 1602 | 2.676 | 0.595  | 2.204 | -1.1576 | -1.1065 | 0.7625  |
| 523SOL | HW2 | 1603 | 2.547 | 0.690  | 2.238 | -1.4409 | -0.9328 | -0.7211 |
| 524SOL | OW  | 1604 | 2.599 | 0.273  | 0.545 | -0.8381 | -0.1701 | -0.0545 |
| 524SOL | HW1 | 1605 | 2.525 | 0.340  | 0.542 | -0.0852 | 0.7587  | 1.0345  |
| 524SOL | HW2 | 1606 | 2.674 | 0.302  | 0.486 | -0.4123 | 0.0813  | 0.5982  |
| 525SOL | OW  | 1607 | 2.347 | 2.520  | 0.843 | -0.1027 | -0.0150 | -0.2682 |
| 525SOL | HW1 | 1608 | 2.287 | 2.586  | 0.798 | -0.7385 | -0.4547 | -0.0806 |
| 525SOL | HW2 | 1609 | 2.319 | 2.508  | 0.938 | 1.1581  | 0.8190  | 0.2277  |
| 526SOL | OW  | 1610 | 1.011 | 2.224  | 2.104 | -0.6185 | 0.1390  | 0.2315  |
| 526SOL | HW1 | 1611 | 1.060 | 2.141  | 2.131 | -3.0935 | -1.3708 | 0.3555  |
| 526SOL | HW2 | 1612 | 0.981 | 2.274  | 2.185 | 1.2961  | 1.5320  | 0.1680  |
| 527SOL | OW  | 1613 | 2.002 | 1.062  | 1.854 | 0.1875  | 0.8113  | 0.3818  |
| 527SOL | HW1 | 1614 | 1.990 | 0.999  | 1.777 | 0.4644  | -0.8818 | 1.6535  |
| 527SOL | HW2 | 1615 | 2.099 | 1.087  | 1.862 | 0.2643  | 0.4791  | 0.5330  |
| 528SOL | OW  | 1616 | 0.236 | 0.137  | 0.555 | 0.1898  | -0.1294 | -0.1402 |
| 528SOL | HW1 | 1617 | 0.316 | 0.078  | 0.548 | -0.4082 | -0.9012 | -0.6965 |
| 528SOL | HW2 | 1618 | 0.157 | 0.082  | 0.583 | -0.7959 | 0.0023  | -2.4429 |
| 529SOL | OW  | 1619 | 1.305 | 0.819  | 0.501 | -1.0946 | -0.5029 | -0.0977 |
| 529SOL | HW1 | 1620 | 1.268 | 0.726  | 0.504 | -0.7982 | -0.7629 | -2.4021 |
| 529SOL | HW2 | 1621 | 1.306 | 0.851  | 0.406 | 1.4810  | 0.7516  | 0.2672  |
| 530SOL | OW  | 1622 | 0.533 | 2.375  | 0.507 | 0.1564  | -0.5595 | 0.4442  |
| 530SOL | HW1 | 1623 | 0.438 | 2.353  | 0.525 | 0.5913  | -2.4202 | 0.6319  |
| 530SOL | HW2 | 1624 | 0.552 | 2.367  | 0.409 | -0.3168 | 1.8288  | 0.0837  |
| 531SOL | OW  | 1625 | 1.727 | 1.239  | 2.133 | -0.0433 | 0.0102  | -0.1520 |
| 531SOL | HW1 | 1626 | 1.826 | 1.230  | 2.123 | 0.0762  | -1.1688 | 1.5821  |
| 531SOL | HW2 | 1627 | 1.682 | 1.159  | 2.092 | -0.0796 | -0.6879 | 1.1899  |
| 532SOL | OW  | 1628 | 0.151 | 1.308  | 0.614 | -0.0479 | 0.2777  | -0.2734 |
| 532SOL | HW1 | 1629 | 0.125 | 1.238  | 0.681 | -2.0110 | 1.9496  | 0.8015  |
| 532SOL | HW2 | 1630 | 0.251 | 1.321  | 0.617 | 0.0574  | -0.5880 | 1.4132  |
| 533SOL | OW  | 1631 | 0.973 | 0.332  | 0.342 | 0.1046  | -0.2477 | -0.2771 |
| 533SOL | HW1 | 1632 | 0.900 | 0.372  | 0.397 | -0.1554 | -1.9410 | 0.6648  |
| 533SOL | HW2 | 1633 | 0.946 | 0.330  | 0.246 | 0.1133  | 1.7276  | -0.3731 |

|        |          |       |       |       |         |         |         |
|--------|----------|-------|-------|-------|---------|---------|---------|
| 534SOL | OW 1634  | 2.554 | 2.635 | 1.133 | 0.5773  | -0.1025 | -0.3390 |
| 534SOL | HW1 1635 | 2.568 | 2.700 | 1.207 | 0.0201  | 0.4676  | -0.7243 |
| 534SOL | HW2 1636 | 2.458 | 2.608 | 1.130 | 0.9002  | -1.3808 | 0.1626  |
| 535SOL | OW 1637  | 1.289 | 2.341 | 0.814 | -0.0831 | 0.0096  | 0.1141  |
| 535SOL | HW1 1638 | 1.317 | 2.404 | 0.742 | -0.7423 | 1.8939  | 1.4108  |
| 535SOL | HW2 1639 | 1.302 | 2.385 | 0.903 | -0.8199 | -1.6139 | 1.0668  |
| 536SOL | OW 1640  | 0.390 | 2.838 | 2.029 | -0.0966 | 0.3264  | -0.1784 |
| 536SOL | HW1 1641 | 0.465 | 2.794 | 2.077 | 0.2629  | 0.1061  | -0.9238 |
| 536SOL | HW2 1642 | 0.303 | 2.814 | 2.072 | 0.1966  | -0.1268 | 0.1550  |
| 537SOL | OW 1643  | 0.596 | 0.231 | 0.334 | -0.2350 | 0.0857  | 0.4157  |
| 537SOL | HW1 1644 | 0.553 | 0.162 | 0.391 | -0.3038 | -0.8757 | -0.7693 |
| 537SOL | HW2 1645 | 0.546 | 0.317 | 0.342 | -1.2348 | -0.5000 | 0.5148  |
| 538SOL | OW 1646  | 2.766 | 1.916 | 1.846 | 0.2672  | -0.4061 | 0.2044  |
| 538SOL | HW1 1647 | 2.820 | 1.972 | 1.908 | -0.8226 | 0.5962  | 0.2838  |
| 538SOL | HW2 1648 | 2.752 | 1.965 | 1.760 | -1.3101 | -0.2149 | 0.5362  |
| 539SOL | OW 1649  | 3.001 | 1.093 | 0.934 | -0.0663 | -0.4023 | -0.3713 |
| 539SOL | HW1 1650 | 2.957 | 1.079 | 0.845 | 0.1919  | -2.5710 | -0.2007 |
| 539SOL | HW2 1651 | 2.943 | 1.152 | 0.991 | -0.1109 | 1.2515  | -2.0155 |
| 540SOL | OW 1652  | 1.472 | 2.063 | 1.050 | 0.0283  | 0.0663  | -0.5595 |
| 540SOL | HW1 1653 | 1.492 | 2.021 | 1.138 | 1.8159  | 1.7215  | -0.1046 |
| 540SOL | HW2 1654 | 1.375 | 2.054 | 1.029 | -0.3618 | -0.6317 | 1.4126  |
| 541SOL | OW 1655  | 2.406 | 1.542 | 0.521 | -0.1571 | 0.0543  | -0.3422 |
| 541SOL | HW1 1656 | 2.406 | 1.575 | 0.427 | 0.7353  | -0.0465 | -0.3880 |
| 541SOL | HW2 1657 | 2.461 | 1.603 | 0.578 | 1.3464  | -1.1831 | -0.3833 |
| 542SOL | OW 1658  | 2.622 | 0.672 | 0.398 | -0.0019 | 0.0122  | 0.4126  |
| 542SOL | HW1 1659 | 2.575 | 0.749 | 0.439 | -0.3374 | -0.5004 | 1.0098  |
| 542SOL | HW2 1660 | 2.603 | 0.589 | 0.450 | -0.6712 | -0.7164 | -0.9208 |
| 543SOL | OW 1661  | 0.360 | 2.613 | 0.727 | 0.4075  | -0.0077 | 0.4259  |
| 543SOL | HW1 1662 | 0.362 | 2.523 | 0.771 | -1.2240 | 0.0457  | 0.6693  |
| 543SOL | HW2 1663 | 0.290 | 2.613 | 0.656 | 0.8589  | 0.8763  | -0.0311 |
| 544SOL | OW 1664  | 1.455 | 3.009 | 1.400 | -0.3064 | -0.3017 | -0.3237 |
| 544SOL | HW1 1665 | 1.440 | 3.094 | 1.350 | 0.4379  | -0.7920 | -1.4247 |
| 544SOL | HW2 1666 | 1.367 | 2.967 | 1.422 | -0.6557 | -0.1119 | -1.3127 |
| 545SOL | OW 1667  | 2.729 | 2.630 | 0.104 | 0.5463  | -0.0886 | -0.3368 |
| 545SOL | HW1 1668 | 2.662 | 2.696 | 0.068 | -1.9063 | -0.4712 | 2.9763  |
| 545SOL | HW2 1669 | 2.681 | 2.546 | 0.131 | 2.4239  | -0.5910 | 1.7195  |
| 546SOL | OW 1670  | 0.418 | 0.137 | 0.768 | -0.5103 | -0.0733 | 0.1063  |
| 546SOL | HW1 1671 | 0.476 | 0.093 | 0.837 | -1.6655 | -1.0797 | 0.4722  |
| 546SOL | HW2 1672 | 0.451 | 0.113 | 0.677 | 0.8578  | 1.0311  | 0.2858  |
| 547SOL | OW 1673  | 0.612 | 1.391 | 1.916 | 0.6177  | -0.3251 | -0.1258 |
| 547SOL | HW1 1674 | 0.548 | 1.365 | 1.988 | 1.3847  | -2.6435 | -0.1957 |
| 547SOL | HW2 1675 | 0.633 | 1.311 | 1.859 | 1.7298  | 0.9275  | -1.5889 |
| 548SOL | OW 1676  | 1.277 | 2.486 | 1.744 | 0.2791  | -0.3279 | 0.0580  |
| 548SOL | HW1 1677 | 1.245 | 2.461 | 1.835 | -0.3446 | 2.1082  | 0.6061  |
| 548SOL | HW2 1678 | 1.374 | 2.464 | 1.734 | 0.4524  | -0.2658 | 1.4649  |
| 549SOL | OW 1679  | 1.662 | 2.344 | 0.141 | 0.0097  | 0.3667  | 0.1752  |
| 549SOL | HW1 1680 | 1.619 | 2.386 | 0.061 | -0.6167 | 1.6474  | 1.1455  |
| 549SOL | HW2 1681 | 1.659 | 2.244 | 0.132 | -2.0609 | 0.4343  | -0.3846 |
| 550SOL | OW 1682  | 0.371 | 1.675 | 0.336 | -0.5913 | 0.2758  | -0.4255 |
| 550SOL | HW1 1683 | 0.374 | 1.736 | 0.415 | 0.9012  | 0.8098  | -0.8451 |
| 550SOL | HW2 1684 | 0.300 | 1.607 | 0.349 | -0.9157 | 0.8455  | 1.0062  |
| 551SOL | OW 1685  | 2.548 | 2.344 | 1.290 | 0.2731  | 0.4680  | -0.0096 |

|        |          |       |       |       |         |         |         |
|--------|----------|-------|-------|-------|---------|---------|---------|
| 551SOL | HW1 1686 | 2.595 | 2.302 | 1.368 | -0.7010 | -0.3650 | 0.1506  |
| 551SOL | HW2 1687 | 2.583 | 2.304 | 1.205 | -1.7124 | -1.9417 | 0.1798  |
| 552SOL | OW 1688  | 1.284 | 2.909 | 0.416 | -0.9002 | 0.5129  | 0.3786  |
| 552SOL | HW1 1689 | 1.258 | 2.966 | 0.337 | 0.4630  | 0.6803  | 0.0210  |
| 552SOL | HW2 1690 | 1.383 | 2.899 | 0.418 | -0.9034 | 0.5936  | 2.1515  |
| 553SOL | OW 1691  | 3.085 | 0.209 | 0.789 | -0.1664 | 0.6095  | -0.1191 |
| 553SOL | HW1 1692 | 3.067 | 0.302 | 0.758 | 0.9117  | 1.8042  | 2.4718  |
| 553SOL | HW2 1693 | 3.175 | 0.206 | 0.832 | -0.9779 | -1.1243 | 1.6099  |
| 554SOL | OW 1694  | 1.564 | 2.721 | 1.653 | -0.4989 | -1.0627 | 0.5683  |
| 554SOL | HW1 1695 | 1.530 | 2.627 | 1.658 | -0.2920 | -1.0892 | 1.6980  |
| 554SOL | HW2 1696 | 1.571 | 2.749 | 1.557 | -1.3525 | -1.9066 | 0.2462  |
| 555SOL | OW 1697  | 1.220 | 0.298 | 1.527 | -0.0374 | 0.0889  | 0.7236  |
| 555SOL | HW1 1698 | 1.212 | 0.397 | 1.532 | -3.8874 | -0.0572 | 0.6669  |
| 555SOL | HW2 1699 | 1.261 | 0.263 | 1.611 | 2.6148  | 1.7025  | 0.2001  |
| 556SOL | OW 1700  | 2.986 | 2.036 | 0.800 | 0.1305  | -0.3063 | 0.4426  |
| 556SOL | HW1 1701 | 3.077 | 2.030 | 0.839 | 0.4974  | 1.2690  | -0.1154 |
| 556SOL | HW2 1702 | 2.919 | 2.051 | 0.873 | 0.4078  | -0.6071 | 0.7623  |
| 557SOL | OW 1703  | 1.253 | 0.998 | 1.765 | 0.3272  | 0.2665  | 0.0156  |
| 557SOL | HW1 1704 | 1.343 | 0.990 | 1.807 | 0.2059  | 2.2376  | 0.7443  |
| 557SOL | HW2 1705 | 1.218 | 1.091 | 1.777 | -2.0712 | -0.5911 | 0.2800  |
| 558SOL | OW 1706  | 1.437 | 1.469 | 1.269 | 0.1552  | 0.1698  | -0.3517 |
| 558SOL | HW1 1707 | 1.455 | 1.456 | 1.171 | -1.0332 | -0.7516 | -0.4658 |
| 558SOL | HW2 1708 | 1.474 | 1.392 | 1.320 | -0.0281 | 0.2090  | -0.1623 |
| 559SOL | OW 1709  | 3.049 | 2.179 | 0.298 | -0.7746 | 0.4528  | -0.5089 |
| 559SOL | HW1 1710 | 3.069 | 2.147 | 0.391 | -0.3663 | -1.6757 | -1.2828 |
| 559SOL | HW2 1711 | 2.976 | 2.123 | 0.259 | -0.5382 | 0.9453  | -1.6845 |
| 560SOL | OW 1712  | 0.996 | 2.639 | 1.622 | 0.1203  | 0.2521  | 0.1121  |
| 560SOL | HW1 1713 | 0.944 | 2.662 | 1.703 | -0.7413 | 0.3870  | -0.4647 |
| 560SOL | HW2 1714 | 1.094 | 2.642 | 1.642 | -0.0763 | 0.7742  | 0.9982  |
| 561SOL | OW 1715  | 0.552 | 0.903 | 2.188 | -0.5641 | -0.3704 | -0.7909 |
| 561SOL | HW1 1716 | 0.456 | 0.924 | 2.172 | -0.6398 | -0.0826 | -0.0207 |
| 561SOL | HW2 1717 | 0.609 | 0.969 | 2.140 | -0.7848 | 0.5619  | 0.1797  |
| 562SOL | OW 1718  | 1.031 | 3.093 | 1.597 | 0.8594  | 0.3839  | 0.4718  |
| 562SOL | HW1 1719 | 1.049 | 3.134 | 1.687 | 0.4717  | -1.2821 | 1.3507  |
| 562SOL | HW2 1720 | 1.117 | 3.059 | 1.559 | 0.8102  | -0.3068 | 0.9512  |
| 563SOL | OW 1721  | 0.729 | 1.968 | 1.325 | -0.3150 | -0.3458 | -0.8711 |
| 563SOL | HW1 1722 | 0.794 | 2.041 | 1.346 | -1.9896 | 1.0754  | -0.3940 |
| 563SOL | HW2 1723 | 0.777 | 1.881 | 1.320 | 1.6505  | 0.6870  | -0.8331 |
| 564SOL | OW 1724  | 0.329 | 1.299 | 1.699 | 0.1771  | -0.2517 | -0.1491 |
| 564SOL | HW1 1725 | 0.230 | 1.292 | 1.689 | 0.2285  | 0.5169  | -1.5062 |
| 564SOL | HW2 1726 | 0.351 | 1.374 | 1.761 | -0.0960 | 0.2266  | -0.6165 |
| 565SOL | OW 1727  | 2.809 | 1.399 | 1.034 | 0.0699  | 0.4196  | 0.2600  |
| 565SOL | HW1 1728 | 2.812 | 1.494 | 1.062 | 2.7203  | 0.6806  | -0.6357 |
| 565SOL | HW2 1729 | 2.831 | 1.340 | 1.112 | -1.0446 | 0.5331  | 0.6821  |
| 566SOL | OW 1730  | 0.170 | 2.413 | 0.237 | -0.0347 | 0.4104  | 0.0897  |
| 566SOL | HW1 1731 | 0.143 | 2.321 | 0.209 | 0.8087  | 0.5780  | -1.3582 |
| 566SOL | HW2 1732 | 0.118 | 2.480 | 0.185 | 1.0618  | 0.7277  | -0.6361 |
| 567SOL | OW 1733  | 0.823 | 2.644 | 0.241 | -0.1186 | 0.2561  | -0.2393 |
| 567SOL | HW1 1734 | 0.858 | 2.649 | 0.335 | -0.3116 | -1.4871 | -0.0405 |
| 567SOL | HW2 1735 | 0.895 | 2.608 | 0.181 | -0.1742 | 0.8474  | -0.6654 |
| 568SOL | OW 1736  | 0.018 | 0.123 | 1.854 | 0.3428  | -0.6029 | 0.3900  |
| 568SOL | HW1 1737 | 0.102 | 0.178 | 1.853 | -0.5766 | 0.9008  | 1.5912  |

|        |          |        |        |       |         |         |         |
|--------|----------|--------|--------|-------|---------|---------|---------|
| 568SOL | HW2 1738 | -0.002 | 0.091  | 1.761 | 2.3845  | -1.2522 | 0.1275  |
| 569SOL | OW 1739  | 1.879  | 1.372  | 0.499 | -0.4294 | -0.3201 | 0.0136  |
| 569SOL | HW1 1740 | 1.928  | 1.444  | 0.548 | -1.5146 | 0.4065  | 0.0525  |
| 569SOL | HW2 1741 | 1.787  | 1.403  | 0.477 | -0.4680 | -1.2035 | -1.1578 |
| 570SOL | OW 1742  | 2.365  | 0.029  | 0.721 | -0.6558 | 0.9277  | 0.4886  |
| 570SOL | HW1 1743 | 2.384  | -0.064 | 0.751 | -0.4903 | 0.0853  | -1.9883 |
| 570SOL | HW2 1744 | 2.424  | 0.093  | 0.771 | 1.4083  | -0.6054 | 0.1313  |
| 571SOL | OW 1745  | 0.374  | 1.693  | 1.559 | 0.0531  | -0.1171 | 1.2707  |
| 571SOL | HW1 1746 | 0.317  | 1.775  | 1.563 | -0.6859 | -0.5787 | 0.3793  |
| 571SOL | HW2 1747 | 0.392  | 1.660  | 1.652 | 0.4682  | 1.1132  | 1.6494  |
| 572SOL | OW 1748  | 2.196  | 0.565  | 1.378 | 0.2253  | -0.4636 | 0.2214  |
| 572SOL | HW1 1749 | 2.229  | 0.504  | 1.450 | 1.2940  | -1.2228 | -0.8776 |
| 572SOL | HW2 1750 | 2.263  | 0.570  | 1.305 | -0.8117 | 0.3299  | -0.7163 |
| 573SOL | OW 1751  | 2.283  | 2.102  | 0.634 | 0.0013  | -0.0483 | 0.0812  |
| 573SOL | HW1 1752 | 2.233  | 2.025  | 0.676 | -2.3082 | 1.4183  | 0.1911  |
| 573SOL | HW2 1753 | 2.236  | 2.130  | 0.551 | 0.3453  | 1.7390  | 0.4623  |
| 574SOL | OW 1754  | 0.955  | 2.102  | 1.051 | -0.0207 | 0.3331  | -0.4544 |
| 574SOL | HW1 1755 | 0.887  | 2.174  | 1.040 | -1.9930 | -1.2307 | 0.8440  |
| 574SOL | HW2 1756 | 0.913  | 2.013  | 1.031 | 1.8881  | -0.6227 | -0.4364 |
| 575SOL | OW 1757  | 0.113  | 3.034  | 0.685 | 0.5944  | -0.0312 | -0.1274 |
| 575SOL | HW1 1758 | 0.130  | 3.015  | 0.782 | 1.7005  | -0.9278 | -0.4790 |
| 575SOL | HW2 1759 | 0.015  | 3.038  | 0.669 | 0.3995  | 1.3841  | 1.2617  |
| 576SOL | OW 1760  | 0.099  | 2.902  | 0.339 | 0.0846  | 0.9495  | -0.2886 |
| 576SOL | HW1 1761 | 0.019  | 2.941  | 0.292 | -0.3329 | 1.0786  | 0.5142  |
| 576SOL | HW2 1762 | 0.116  | 2.953  | 0.423 | 0.8863  | 0.7771  | -0.3411 |
| 577SOL | OW 1763  | 1.139  | 1.449  | 1.496 | 0.0304  | 0.4785  | -0.2262 |
| 577SOL | HW1 1764 | 1.172  | 1.497  | 1.577 | 0.0523  | 0.9518  | -0.5096 |
| 577SOL | HW2 1765 | 1.204  | 1.461  | 1.421 | 0.0742  | -0.0637 | -0.2809 |
| 578SOL | OW 1766  | 2.616  | 2.995  | 1.693 | -0.6110 | 0.9208  | -0.4885 |
| 578SOL | HW1 1767 | 2.707  | 2.955  | 1.684 | -0.5939 | 1.2285  | -1.8289 |
| 578SOL | HW2 1768 | 2.568  | 2.952  | 1.771 | 0.0714  | -0.3896 | -0.7612 |
| 579SOL | OW 1769  | 0.270  | 2.039  | 1.521 | 0.6561  | 0.7161  | 0.0128  |
| 579SOL | HW1 1770 | 0.200  | 2.044  | 1.450 | 0.1728  | 0.2425  | 0.4486  |
| 579SOL | HW2 1771 | 0.358  | 2.012  | 1.481 | -0.1455 | -2.0529 | -0.0858 |
| 580SOL | OW 1772  | 2.998  | 1.193  | 1.467 | 0.6600  | 0.1839  | 0.1545  |
| 580SOL | HW1 1773 | 3.006  | 1.211  | 1.565 | -1.0128 | -0.5968 | 0.4691  |
| 580SOL | HW2 1774 | 2.909  | 1.153  | 1.447 | 1.6375  | -1.3930 | -1.4337 |
| 581SOL | OW 1775  | 2.168  | 0.794  | 0.671 | -0.7347 | -0.7491 | -0.2409 |
| 581SOL | HW1 1776 | 2.240  | 0.760  | 0.732 | -0.2239 | -1.0828 | -1.0140 |
| 581SOL | HW2 1777 | 2.136  | 0.883  | 0.704 | -2.2263 | -2.0058 | 1.9337  |
| 582SOL | OW 1778  | 0.856  | 2.113  | 1.909 | 0.2796  | -0.3369 | 0.1399  |
| 582SOL | HW1 1779 | 0.929  | 2.149  | 1.966 | 0.8363  | -2.0396 | 0.5427  |
| 582SOL | HW2 1780 | 0.842  | 2.016  | 1.928 | -2.7356 | 0.0946  | 0.7603  |
| 583SOL | OW 1781  | 0.985  | 0.104  | 0.064 | -0.2187 | -0.2474 | -0.0346 |
| 583SOL | HW1 1782 | 0.954  | 0.045  | 0.139 | 1.7952  | -0.0633 | 1.0122  |
| 583SOL | HW2 1783 | 0.935  | 0.191  | 0.067 | -0.3199 | -0.3323 | 0.9641  |
| 584SOL | OW 1784  | 2.066  | 2.224  | 1.287 | -0.8722 | 0.1793  | 0.1004  |
| 584SOL | HW1 1785 | 2.078  | 2.302  | 1.348 | 0.0854  | -0.1938 | 0.4072  |
| 584SOL | HW2 1786 | 1.973  | 2.224  | 1.251 | -1.0309 | 1.1874  | 0.4700  |
| 585SOL | OW 1787  | 0.216  | 2.049  | 1.120 | -0.0552 | -0.3659 | 0.0302  |
| 585SOL | HW1 1788 | 0.176  | 2.017  | 1.206 | 0.3400  | -2.3516 | -0.4757 |
| 585SOL | HW2 1789 | 0.312  | 2.020  | 1.115 | -0.3114 | -1.0353 | -1.4350 |

|        |          |        |       |       |         |         |         |
|--------|----------|--------|-------|-------|---------|---------|---------|
| 586SOL | OW 1790  | 0.770  | 2.529 | 0.568 | 0.4768  | 0.3135  | 0.2886  |
| 586SOL | HW1 1791 | 0.693  | 2.473 | 0.536 | 0.8385  | -1.0299 | 1.6304  |
| 586SOL | HW2 1792 | 0.735  | 2.604 | 0.623 | 0.0854  | -0.0600 | 0.5633  |
| 587SOL | OW 1793  | 1.272  | 0.941 | 1.497 | 0.4616  | -0.6658 | 0.3107  |
| 587SOL | HW1 1794 | 1.367  | 0.922 | 1.473 | 0.4308  | 1.1177  | -1.5444 |
| 587SOL | HW2 1795 | 1.269  | 0.986 | 1.587 | 1.3123  | -1.1409 | 0.5899  |
| 588SOL | OW 1796  | 2.253  | 2.311 | 2.147 | 0.3548  | -0.2400 | -0.2795 |
| 588SOL | HW1 1797 | 2.293  | 2.378 | 2.085 | -2.6143 | 2.9767  | 0.9588  |
| 588SOL | HW2 1798 | 2.191  | 2.251 | 2.096 | 0.0477  | 0.5637  | -0.8639 |
| 589SOL | OW 1799  | 1.070  | 1.600 | 0.698 | 0.7935  | 0.5580  | 0.4368  |
| 589SOL | HW1 1800 | 1.091  | 1.503 | 0.715 | 0.2466  | 0.4059  | 0.2670  |
| 589SOL | HW2 1801 | 1.036  | 1.611 | 0.605 | 2.9466  | 1.2642  | -0.3052 |
| 590SOL | OW 1802  | 0.697  | 0.764 | 1.298 | -0.5497 | -0.0579 | 0.1787  |
| 590SOL | HW1 1803 | 0.783  | 0.737 | 1.340 | -0.2299 | -1.0306 | -1.0540 |
| 590SOL | HW2 1804 | 0.636  | 0.802 | 1.369 | 1.8701  | 3.3931  | 0.6516  |
| 591SOL | OW 1805  | 1.116  | 0.087 | 1.164 | -0.2716 | -0.0164 | -1.0736 |
| 591SOL | HW1 1806 | 1.078  | 0.036 | 1.087 | -0.0928 | 0.3165  | -1.3882 |
| 591SOL | HW2 1807 | 1.043  | 0.107 | 1.230 | -0.5392 | 0.1647  | -1.4188 |
| 592SOL | OW 1808  | 1.141  | 0.363 | 1.915 | 0.0422  | -0.7196 | 0.3127  |
| 592SOL | HW1 1809 | 1.093  | 0.434 | 1.862 | 0.7079  | 0.7498  | 1.5990  |
| 592SOL | HW2 1810 | 1.237  | 0.359 | 1.886 | 0.3816  | 0.0110  | 1.2580  |
| 593SOL | OW 1811  | 0.058  | 1.486 | 1.505 | 0.2318  | -0.1420 | 0.9717  |
| 593SOL | HW1 1812 | 0.152  | 1.495 | 1.473 | -0.0984 | -0.4839 | -0.1365 |
| 593SOL | HW2 1813 | -0.005 | 1.488 | 1.427 | -0.6131 | -0.9913 | 1.6014  |
| 594SOL | OW 1814  | 3.101  | 0.231 | 0.100 | -0.7072 | -0.1234 | -0.6325 |
| 594SOL | HW1 1815 | 3.095  | 0.293 | 0.022 | 0.3930  | -0.7604 | -1.2420 |
| 594SOL | HW2 1816 | 3.186  | 0.180 | 0.096 | -0.0165 | 0.7091  | 1.6588  |
| 595SOL | OW 1817  | 0.014  | 2.080 | 1.760 | 0.0808  | 0.1794  | 0.2252  |
| 595SOL | HW1 1818 | -0.015 | 2.082 | 1.664 | 1.2026  | 0.7069  | -0.1281 |
| 595SOL | HW2 1819 | 0.107  | 2.043 | 1.765 | 0.3971  | 1.0635  | 1.0094  |
| 596SOL | OW 1820  | 1.012  | 1.341 | 1.020 | 0.6034  | 0.1614  | 0.1023  |
| 596SOL | HW1 1821 | 0.961  | 1.341 | 1.106 | -0.4609 | -0.9305 | -0.4989 |
| 596SOL | HW2 1822 | 0.948  | 1.337 | 0.943 | 1.5697  | -0.6923 | -0.6915 |
| 597SOL | OW 1823  | 0.433  | 1.337 | 0.632 | -0.2667 | -0.1024 | -0.1528 |
| 597SOL | HW1 1824 | 0.525  | 1.376 | 0.633 | 0.2055  | -1.1735 | 0.0868  |
| 597SOL | HW2 1825 | 0.438  | 1.240 | 0.656 | -1.3787 | -0.3605 | -0.8988 |
| 598SOL | OW 1826  | 0.870  | 2.130 | 1.630 | 0.0915  | -0.2579 | -0.1194 |
| 598SOL | HW1 1827 | 0.922  | 2.211 | 1.602 | -0.2159 | -0.0975 | -0.2337 |
| 598SOL | HW2 1828 | 0.864  | 2.127 | 1.730 | 0.9276  | -0.6646 | -0.0702 |
| 599SOL | OW 1829  | 0.444  | 2.197 | 2.178 | 0.7932  | 0.2803  | -0.6262 |
| 599SOL | HW1 1830 | 0.363  | 2.159 | 2.133 | 0.4860  | 1.3206  | -0.9681 |
| 599SOL | HW2 1831 | 0.495  | 2.123 | 2.222 | -1.2151 | -0.2167 | 1.0237  |
| 600SOL | OW 1832  | 1.074  | 2.647 | 2.201 | 0.1578  | 0.0786  | 0.1754  |
| 600SOL | HW1 1833 | 1.133  | 2.567 | 2.212 | -0.7597 | -0.4451 | 1.5652  |
| 600SOL | HW2 1834 | 0.978  | 2.619 | 2.208 | -0.2627 | 1.0178  | -1.3145 |
| 601SOL | OW 1835  | 1.853  | 2.758 | 0.783 | 0.1944  | -0.0759 | -0.1427 |
| 601SOL | HW1 1836 | 1.948  | 2.728 | 0.789 | -0.1224 | -0.9088 | 1.3054  |
| 601SOL | HW2 1837 | 1.829  | 2.810 | 0.865 | -0.1196 | 1.6667  | -1.2956 |
| 602SOL | OW 1838  | 0.730  | 0.659 | 2.155 | -0.0114 | -0.6249 | 0.0319  |
| 602SOL | HW1 1839 | 0.762  | 0.629 | 2.245 | -1.2168 | -0.3722 | 0.5674  |
| 602SOL | HW2 1840 | 0.663  | 0.733 | 2.166 | 0.2201  | -0.2191 | -1.1004 |
| 603SOL | OW 1841  | 2.988  | 2.132 | 1.539 | 0.8794  | -0.3223 | -0.7504 |



|        |     |      |        |       |       |         |         |         |
|--------|-----|------|--------|-------|-------|---------|---------|---------|
| 603SOL | HW1 | 1842 | 3.032  | 2.192 | 1.472 | 0.1182  | 1.6382  | 0.4481  |
| 603SOL | HW2 | 1843 | 2.957  | 2.048 | 1.493 | -0.4804 | 1.3510  | -3.0888 |
| 604SOL | OW  | 1844 | 2.283  | 0.325 | 1.500 | -0.2729 | 0.0374  | -0.2245 |
| 604SOL | HW1 | 1845 | 2.210  | 0.257 | 1.492 | 1.9340  | -2.3314 | -2.6179 |
| 604SOL | HW2 | 1846 | 2.348  | 0.313 | 1.424 | 1.8905  | 2.8960  | 0.9789  |
| 605SOL | OW  | 1847 | 2.062  | 2.596 | 0.982 | -0.1235 | -0.0754 | -0.0914 |
| 605SOL | HW1 | 1848 | 2.058  | 2.696 | 0.975 | -0.4163 | -0.1751 | -2.0640 |
| 605SOL | HW2 | 1849 | 1.984  | 2.563 | 1.034 | -1.1904 | 0.6283  | -1.1804 |
| 606SOL | OW  | 1850 | 0.775  | 1.624 | 1.599 | 0.0853  | -0.7858 | -0.0379 |
| 606SOL | HW1 | 1851 | 0.690  | 1.617 | 1.548 | -0.3112 | -1.9601 | 0.7408  |
| 606SOL | HW2 | 1852 | 0.818  | 1.534 | 1.605 | 1.1249  | -0.3100 | 0.0364  |
| 607SOL | OW  | 1853 | 0.347  | 1.490 | 0.868 | -0.2288 | 0.8056  | 0.3282  |
| 607SOL | HW1 | 1854 | 0.359  | 1.437 | 0.785 | -0.4823 | 2.1616  | -0.6019 |
| 607SOL | HW2 | 1855 | 0.249  | 1.503 | 0.886 | -0.1825 | 0.3666  | 0.9590  |
| 608SOL | OW  | 1856 | 2.302  | 1.598 | 0.234 | -0.3023 | -0.0217 | 0.6293  |
| 608SOL | HW1 | 1857 | 2.372  | 1.611 | 0.165 | -0.0473 | -0.3322 | 0.8275  |
| 608SOL | HW2 | 1858 | 2.226  | 1.662 | 0.218 | -0.0150 | 0.2531  | 0.3664  |
| 609SOL | OW  | 1859 | 0.039  | 3.012 | 1.390 | 0.4080  | 0.2839  | 0.3213  |
| 609SOL | HW1 | 1860 | 0.106  | 2.941 | 1.368 | 0.1653  | -0.0097 | 0.5170  |
| 609SOL | HW2 | 1861 | -0.054 | 2.977 | 1.372 | 0.1488  | -0.2044 | 2.3683  |
| 610SOL | OW  | 1862 | 2.112  | 0.252 | 1.883 | -0.5548 | 0.0026  | 0.6060  |
| 610SOL | HW1 | 1863 | 2.174  | 0.330 | 1.893 | 0.0079  | -0.3131 | -0.2982 |
| 610SOL | HW2 | 1864 | 2.051  | 0.268 | 1.806 | -1.0861 | -0.0360 | 1.0116  |
| 611SOL | OW  | 1865 | 2.046  | 1.301 | 0.159 | 0.3985  | 0.0297  | 0.1914  |
| 611SOL | HW1 | 1866 | 2.087  | 1.238 | 0.093 | -2.0197 | 0.1124  | -1.4798 |
| 611SOL | HW2 | 1867 | 1.950  | 1.278 | 0.173 | -0.1039 | 2.2807  | 0.8695  |
| 612SOL | OW  | 1868 | 0.989  | 1.732 | 1.885 | -0.0498 | 0.2814  | 0.1872  |
| 612SOL | HW1 | 1869 | 0.938  | 1.796 | 1.826 | -0.6735 | -2.1435 | -2.0845 |
| 612SOL | HW2 | 1870 | 0.958  | 1.743 | 1.979 | -0.3500 | 3.0498  | -0.1380 |
| 613SOL | OW  | 1871 | 0.082  | 2.682 | 0.155 | 0.1085  | -0.1418 | -0.5660 |
| 613SOL | HW1 | 1872 | 0.097  | 2.730 | 0.068 | -2.2304 | 1.4736  | -0.1629 |
| 613SOL | HW2 | 1873 | 0.107  | 2.742 | 0.231 | 1.1595  | -1.1742 | -0.0587 |
| 614SOL | OW  | 1874 | 2.876  | 2.829 | 0.238 | 0.3533  | -0.4407 | -0.2290 |
| 614SOL | HW1 | 1875 | 2.844  | 2.765 | 0.169 | -1.5585 | 0.3697  | -0.1455 |
| 614SOL | HW2 | 1876 | 2.871  | 2.787 | 0.329 | -0.3474 | -0.3672 | -0.2337 |
| 615SOL | OW  | 1877 | 2.926  | 0.091 | 2.175 | 0.4305  | -0.0612 | -0.1026 |
| 615SOL | HW1 | 1878 | 2.930  | 0.131 | 2.084 | 1.9020  | -1.1002 | -0.5270 |
| 615SOL | HW2 | 1879 | 3.014  | 0.050 | 2.198 | 0.1061  | 0.2113  | 1.8175  |
| 616SOL | OW  | 1880 | 0.865  | 0.657 | 0.607 | -0.1557 | 0.4992  | -0.0951 |
| 616SOL | HW1 | 1881 | 0.881  | 0.645 | 0.705 | -0.2302 | -0.4295 | -0.1806 |
| 616SOL | HW2 | 1882 | 0.838  | 0.569 | 0.567 | 0.0773  | 0.8211  | -0.9887 |
| 617SOL | OW  | 1883 | 2.872  | 0.214 | 1.549 | -0.2502 | -0.0527 | 0.4413  |
| 617SOL | HW1 | 1884 | 2.955  | 0.268 | 1.543 | -0.1035 | -0.1987 | 1.0256  |
| 617SOL | HW2 | 1885 | 2.813  | 0.252 | 1.621 | -0.5500 | -0.1286 | 0.2381  |
| 618SOL | OW  | 1886 | 2.272  | 2.858 | 1.560 | 0.4747  | -0.0515 | 0.4342  |
| 618SOL | HW1 | 1887 | 2.313  | 2.945 | 1.588 | -0.4283 | 0.1366  | 1.1953  |
| 618SOL | HW2 | 1888 | 2.286  | 2.845 | 1.461 | 1.7331  | 0.3349  | 0.5437  |
| 619SOL | OW  | 1889 | 0.562  | 2.769 | 1.529 | -0.0906 | 0.2295  | 0.1128  |
| 619SOL | HW1 | 1890 | 0.545  | 2.781 | 1.626 | -1.6207 | 1.0019  | -0.2118 |
| 619SOL | HW2 | 1891 | 0.660  | 2.772 | 1.511 | 0.1344  | 3.8942  | 1.2074  |
| 620SOL | OW  | 1892 | 2.287  | 3.147 | 0.234 | 0.8567  | -0.4137 | -0.4152 |
| 620SOL | HW1 | 1893 | 2.283  | 3.053 | 0.269 | -0.0447 | -0.6100 | -1.0280 |

|        |          |       |       |       |         |         |         |
|--------|----------|-------|-------|-------|---------|---------|---------|
| 620SOL | HW2 1894 | 2.203 | 3.168 | 0.184 | 1.0041  | 0.7572  | -0.2045 |
| 621SOL | OW 1895  | 0.648 | 1.575 | 0.698 | -0.3902 | 0.5068  | -0.1191 |
| 621SOL | HW1 1896 | 0.583 | 1.632 | 0.748 | 0.7500  | 0.6187  | 1.3172  |
| 621SOL | HW2 1897 | 0.730 | 1.561 | 0.755 | 0.0794  | -1.1191 | -1.1472 |
| 622SOL | OW 1898  | 1.364 | 2.561 | 0.632 | -0.6794 | -0.1689 | 0.2966  |
| 622SOL | HW1 1899 | 1.344 | 2.573 | 0.535 | -0.3819 | -0.3246 | 0.2139  |
| 622SOL | HW2 1900 | 1.457 | 2.593 | 0.651 | -1.1476 | 0.9856  | 0.7637  |
| 623SOL | OW 1901  | 2.316 | 2.269 | 1.171 | -0.5102 | 0.0908  | 0.1947  |
| 623SOL | HW1 1902 | 2.388 | 2.278 | 1.240 | 0.3251  | 0.6675  | -0.7257 |
| 623SOL | HW2 1903 | 2.234 | 2.233 | 1.214 | 0.9314  | -2.6665 | 0.8965  |
| 624SOL | OW 1904  | 2.568 | 2.781 | 1.357 | -0.3011 | 0.1245  | -0.6175 |
| 624SOL | HW1 1905 | 2.518 | 2.865 | 1.378 | 0.5666  | 0.9136  | -1.6061 |
| 624SOL | HW2 1906 | 2.658 | 2.785 | 1.400 | -0.1311 | -0.1622 | -0.9490 |
| 625SOL | OW 1907  | 1.238 | 1.823 | 1.998 | 0.3292  | 0.1566  | 0.0172  |
| 625SOL | HW1 1908 | 1.176 | 1.865 | 1.931 | 0.4171  | 0.8073  | 0.3400  |
| 625SOL | HW2 1909 | 1.306 | 1.768 | 1.950 | 0.1968  | 0.3619  | -0.4117 |
| 626SOL | OW 1910  | 0.989 | 0.543 | 0.848 | 0.1362  | -0.3831 | -0.0948 |
| 626SOL | HW1 1911 | 1.075 | 0.553 | 0.798 | 0.5442  | -0.5703 | 0.5581  |
| 626SOL | HW2 1912 | 0.991 | 0.458 | 0.901 | -0.6629 | -0.6538 | -0.4800 |
| 627SOL | OW 1913  | 2.954 | 1.919 | 1.162 | 0.5091  | 0.0498  | 0.2549  |
| 627SOL | HW1 1914 | 2.966 | 1.832 | 1.115 | -2.4036 | -1.3511 | 1.8181  |
| 627SOL | HW2 1915 | 2.893 | 1.978 | 1.108 | -0.3473 | -0.3339 | 0.7736  |
| 628SOL | OW 1916  | 0.058 | 1.272 | 1.677 | -0.6870 | 0.5026  | -0.3290 |
| 628SOL | HW1 1917 | 0.047 | 1.345 | 1.610 | 0.2630  | 1.5853  | 0.6318  |
| 628SOL | HW2 1918 | 0.012 | 1.298 | 1.762 | 0.2647  | 0.3326  | 0.2549  |
| 629SOL | OW 1919  | 1.918 | 1.662 | 1.955 | -0.0400 | 0.1408  | 0.1795  |
| 629SOL | HW1 1920 | 1.956 | 1.599 | 2.023 | 0.3625  | 1.1009  | 0.8553  |
| 629SOL | HW2 1921 | 1.971 | 1.747 | 1.954 | -0.0820 | 0.1873  | -1.2831 |
| 630SOL | OW 1922  | 0.036 | 1.761 | 1.548 | -0.3937 | -0.1430 | 0.3497  |
| 630SOL | HW1 1923 | 0.044 | 1.661 | 1.547 | 1.9407  | -0.0001 | -0.4851 |
| 630SOL | HW2 1924 | 0.082 | 1.797 | 1.630 | 0.6896  | 0.3355  | -0.4459 |
| 631SOL | OW 1925  | 0.555 | 1.919 | 1.859 | 0.8285  | 0.3445  | 0.4513  |
| 631SOL | HW1 1926 | 0.540 | 1.884 | 1.951 | 0.5098  | -1.5596 | -0.2620 |
| 631SOL | HW2 1927 | 0.642 | 1.882 | 1.824 | -0.9982 | -2.6095 | -1.4992 |
| 632SOL | OW 1928  | 2.470 | 1.849 | 1.438 | -0.7120 | 0.4367  | -0.3697 |
| 632SOL | HW1 1929 | 2.544 | 1.887 | 1.493 | -0.8896 | 1.1913  | -0.6511 |
| 632SOL | HW2 1930 | 2.483 | 1.874 | 1.342 | -0.1291 | -1.2918 | -0.7822 |
| 633SOL | OW 1931  | 2.811 | 0.347 | 0.417 | 0.4576  | -0.7763 | 0.3944  |
| 633SOL | HW1 1932 | 2.878 | 0.274 | 0.402 | -0.5459 | -1.9420 | 1.4779  |
| 633SOL | HW2 1933 | 2.837 | 0.400 | 0.497 | 0.9902  | -0.1304 | -0.1857 |
| 634SOL | OW 1934  | 3.033 | 2.439 | 1.741 | -0.0090 | -0.0192 | -0.0938 |
| 634SOL | HW1 1935 | 2.952 | 2.497 | 1.751 | -0.0417 | 0.0718  | -0.8240 |
| 634SOL | HW2 1936 | 3.005 | 2.347 | 1.713 | 0.1356  | 0.0077  | -0.3312 |
| 635SOL | OW 1937  | 0.938 | 3.003 | 0.781 | 0.5327  | -0.2011 | 0.5041  |
| 635SOL | HW1 1938 | 0.921 | 2.905 | 0.793 | 0.4658  | -0.0847 | 1.4375  |
| 635SOL | HW2 1939 | 0.986 | 3.018 | 0.695 | 0.2014  | -1.0163 | 0.1705  |
| 636SOL | OW 1940  | 0.978 | 0.941 | 2.008 | -0.4570 | -0.0759 | 0.2969  |
| 636SOL | HW1 1941 | 1.018 | 0.898 | 2.089 | -0.0965 | 0.7152  | 0.5545  |
| 636SOL | HW2 1942 | 1.018 | 1.032 | 1.996 | 0.0051  | -0.4419 | -1.1703 |
| 637SOL | OW 1943  | 1.590 | 1.359 | 0.503 | 0.3797  | 0.7363  | -0.2483 |
| 637SOL | HW1 1944 | 1.537 | 1.422 | 0.560 | 0.5607  | -0.1832 | 0.9785  |
| 637SOL | HW2 1945 | 1.528 | 1.303 | 0.448 | -0.1145 | -1.5593 | 2.4682  |

|        |          |       |       |        |         |         |         |
|--------|----------|-------|-------|--------|---------|---------|---------|
| 638SOL | OW 1946  | 1.179 | 1.240 | 1.291  | 0.0854  | 0.4007  | -0.2558 |
| 638SOL | HW1 1947 | 1.137 | 1.329 | 1.278  | 0.9092  | 0.9479  | 0.6703  |
| 638SOL | HW2 1948 | 1.266 | 1.251 | 1.339  | -0.0169 | -0.9420 | 0.2904  |
| 639SOL | OW 1949  | 2.318 | 0.890 | 0.268  | 0.0339  | -0.3383 | -0.0196 |
| 639SOL | HW1 1950 | 2.331 | 0.968 | 0.330  | -1.6672 | 0.5084  | -0.6576 |
| 639SOL | HW2 1951 | 2.240 | 0.835 | 0.301  | 1.5019  | -2.0993 | 0.6968  |
| 640SOL | OW 1952  | 2.224 | 1.239 | 1.904  | -0.0351 | -0.0626 | -0.0507 |
| 640SOL | HW1 1953 | 2.307 | 1.231 | 1.960  | 1.4956  | -0.2043 | -2.2271 |
| 640SOL | HW2 1954 | 2.220 | 1.330 | 1.864  | -0.8560 | -0.1176 | -0.0947 |
| 641SOL | OW 1955  | 2.423 | 0.698 | 0.784  | -0.0673 | 0.5021  | 0.1086  |
| 641SOL | HW1 1956 | 2.493 | 0.677 | 0.851  | 0.1263  | 1.0440  | 0.0816  |
| 641SOL | HW2 1957 | 2.415 | 0.797 | 0.774  | 1.6373  | 0.4796  | -2.4237 |
| 642SOL | OW 1958  | 2.578 | 1.328 | 0.362  | -0.5692 | 0.2087  | 0.2197  |
| 642SOL | HW1 1959 | 2.614 | 1.322 | 0.269  | -0.4500 | 1.5070  | 0.1712  |
| 642SOL | HW2 1960 | 2.493 | 1.276 | 0.368  | -0.7419 | 0.3741  | -0.6930 |
| 643SOL | OW 1961  | 1.752 | 2.854 | 1.024  | 0.0825  | 0.1216  | 0.4125  |
| 643SOL | HW1 1962 | 1.711 | 2.945 | 1.030  | -2.2479 | -0.7566 | -0.9704 |
| 643SOL | HW2 1963 | 1.832 | 2.850 | 1.085  | -0.1864 | 2.8146  | 1.0941  |
| 644SOL | OW 1964  | 0.754 | 2.352 | 1.308  | 0.2489  | -0.1850 | -0.1958 |
| 644SOL | HW1 1965 | 0.778 | 2.432 | 1.363  | 0.1894  | -1.4554 | 1.7947  |
| 644SOL | HW2 1966 | 0.822 | 2.280 | 1.323  | 0.5384  | -0.4062 | -2.2753 |
| 645SOL | OW 1967  | 1.310 | 0.954 | 0.934  | -0.3237 | -0.7044 | -0.0033 |
| 645SOL | HW1 1968 | 1.345 | 0.918 | 0.848  | 1.8660  | -0.3982 | 0.7031  |
| 645SOL | HW2 1969 | 1.382 | 1.005 | 0.981  | -1.7551 | -0.0098 | 1.5615  |
| 646SOL | OW 1970  | 2.851 | 1.170 | 2.072  | -0.4086 | -0.0897 | -0.4920 |
| 646SOL | HW1 1971 | 2.871 | 1.235 | 2.145  | -0.1724 | -0.0560 | -0.5865 |
| 646SOL | HW2 1972 | 2.769 | 1.199 | 2.023  | -0.2946 | 0.1431  | -0.5443 |
| 647SOL | OW 1973  | 2.872 | 1.597 | 1.478  | 0.5376  | -0.4007 | -0.3651 |
| 647SOL | HW1 1974 | 2.885 | 1.544 | 1.561  | -0.7346 | -0.9135 | -0.4691 |
| 647SOL | HW2 1975 | 2.933 | 1.563 | 1.407  | -0.0033 | -1.4990 | -0.3255 |
| 648SOL | OW 1976  | 1.275 | 0.252 | 0.259  | 0.1522  | 0.8040  | -0.8862 |
| 648SOL | HW1 1977 | 1.241 | 0.345 | 0.243  | 2.2932  | 1.5692  | -1.3046 |
| 648SOL | HW2 1978 | 1.304 | 0.213 | 0.171  | -0.3374 | -0.1273 | -0.6467 |
| 649SOL | OW 1979  | 2.393 | 2.545 | 1.406  | 0.0901  | -0.2612 | -0.2578 |
| 649SOL | HW1 1980 | 2.451 | 2.472 | 1.370  | -1.2495 | -0.8187 | -1.3672 |
| 649SOL | HW2 1981 | 2.440 | 2.633 | 1.395  | -0.0700 | -0.4419 | -3.0421 |
| 650SOL | OW 1982  | 1.658 | 2.029 | 0.838  | 0.5615  | 0.2518  | -0.4393 |
| 650SOL | HW1 1983 | 1.578 | 2.042 | 0.895  | -0.4321 | -0.5680 | -1.5927 |
| 650SOL | HW2 1984 | 1.726 | 2.100 | 0.859  | 0.6854  | -0.5852 | 2.4312  |
| 651SOL | OW 1985  | 0.588 | 0.782 | 1.556  | 0.3083  | 0.4910  | -0.2452 |
| 651SOL | HW1 1986 | 0.543 | 0.729 | 1.628  | -0.8722 | -1.2367 | -2.1473 |
| 651SOL | HW2 1987 | 0.673 | 0.821 | 1.591  | 0.7704  | -1.9062 | 1.5264  |
| 652SOL | OW 1988  | 2.583 | 1.727 | 1.825  | -0.2091 | 0.3528  | 0.2311  |
| 652SOL | HW1 1989 | 2.654 | 1.797 | 1.816  | 0.6251  | -0.4683 | 0.2973  |
| 652SOL | HW2 1990 | 2.579 | 1.673 | 1.741  | 0.2830  | -0.5445 | 0.7639  |
| 653SOL | OW 1991  | 1.595 | 1.054 | 1.963  | 0.5332  | -0.8118 | 0.3273  |
| 653SOL | HW1 1992 | 1.677 | 1.068 | 1.906  | 1.9353  | -1.0881 | 2.1681  |
| 653SOL | HW2 1993 | 1.577 | 0.956 | 1.972  | -2.7595 | -0.8187 | -3.6504 |
| 654SOL | OW 1994  | 2.630 | 2.189 | 0.037  | -0.4560 | -0.4782 | -0.2626 |
| 654SOL | HW1 1995 | 2.678 | 2.105 | 0.014  | -0.2431 | -0.2884 | -0.5157 |
| 654SOL | HW2 1996 | 2.546 | 2.196 | -0.018 | -0.5526 | -0.5986 | -0.1313 |
| 655SOL | OW 1997  | 2.809 | 2.113 | 0.978  | 0.0749  | -0.2190 | 0.0629  |

|        |          |        |       |        |         |         |         |
|--------|----------|--------|-------|--------|---------|---------|---------|
| 655SOL | HW1 1998 | 2.710  | 2.113 | 0.989  | 0.2131  | 0.9271  | 1.5451  |
| 655SOL | HW2 1999 | 2.843  | 2.207 | 0.986  | 1.4070  | -0.7546 | 0.9255  |
| 656SOL | OW 2000  | 1.180  | 1.947 | 1.372  | -0.0560 | -0.2088 | 0.3830  |
| 656SOL | HW1 2001 | 1.095  | 1.897 | 1.386  | -0.2642 | 0.2825  | 0.9147  |
| 656SOL | HW2 2002 | 1.258  | 1.890 | 1.398  | -0.1632 | -0.9238 | -0.7799 |
| 657SOL | OW 2003  | 1.035  | 2.524 | 1.097  | 0.5100  | -0.0095 | -0.3328 |
| 657SOL | HW1 2004 | 1.004  | 2.509 | 1.191  | -1.9071 | -0.6512 | -1.1460 |
| 657SOL | HW2 2005 | 1.126  | 2.485 | 1.085  | 1.3404  | 1.0399  | 1.9803  |
| 658SOL | OW 2006  | 1.836  | 2.562 | 1.151  | 0.5433  | 0.4945  | -0.0675 |
| 658SOL | HW1 2007 | 1.748  | 2.535 | 1.112  | 0.2467  | 1.2148  | 0.0944  |
| 658SOL | HW2 2008 | 1.835  | 2.548 | 1.250  | 0.8851  | -0.2085 | -0.1505 |
| 659SOL | OW 2009  | 1.363  | 0.293 | 1.770  | -0.2159 | -0.2173 | 0.2204  |
| 659SOL | HW1 2010 | 1.445  | 0.338 | 1.736  | -0.9706 | 1.3225  | 0.3552  |
| 659SOL | HW2 2011 | 1.384  | 0.198 | 1.792  | 1.5623  | 0.1852  | 0.4134  |
| 660SOL | OW 2012  | 2.796  | 1.551 | 0.068  | -0.0286 | 0.1008  | -0.4912 |
| 660SOL | HW1 2013 | 2.800  | 1.454 | 0.092  | 0.1900  | 0.5395  | 1.4316  |
| 660SOL | HW2 2014 | 2.817  | 1.562 | -0.029 | -1.1080 | -1.8504 | -1.0130 |
| 661SOL | OW 2015  | 1.433  | 1.220 | 1.409  | -0.3203 | -0.2759 | -0.0857 |
| 661SOL | HW1 2016 | 1.476  | 1.232 | 1.499  | -1.8590 | -0.4900 | 0.7041  |
| 661SOL | HW2 2017 | 1.456  | 1.129 | 1.374  | 0.4946  | -0.0991 | -0.0267 |
| 662SOL | OW 2018  | 1.607  | 0.402 | 1.000  | -0.0401 | 0.0464  | 0.6118  |
| 662SOL | HW1 2019 | 1.674  | 0.451 | 1.056  | -0.2014 | -0.2108 | 1.0261  |
| 662SOL | HW2 2020 | 1.530  | 0.463 | 0.979  | -1.1313 | -0.5343 | 2.6440  |
| 663SOL | OW 2021  | 0.913  | 1.160 | 1.698  | -1.0079 | 0.6889  | 0.0233  |
| 663SOL | HW1 2022 | 1.009  | 1.183 | 1.715  | -1.2234 | 0.9615  | 0.8894  |
| 663SOL | HW2 2023 | 0.870  | 1.232 | 1.644  | -0.3884 | -0.0647 | -1.5601 |
| 664SOL | OW 2024  | 1.997  | 1.787 | 1.569  | 0.4800  | -0.3972 | -0.2640 |
| 664SOL | HW1 2025 | 1.962  | 1.876 | 1.543  | 2.4451  | 0.7938  | 0.8606  |
| 664SOL | HW2 2026 | 2.072  | 1.761 | 1.507  | 1.3971  | -0.1807 | 0.7204  |
| 665SOL | OW 2027  | 0.750  | 0.406 | 0.988  | 0.1667  | 0.0255  | -0.3530 |
| 665SOL | HW1 2028 | 0.837  | 0.396 | 1.035  | 1.5397  | 0.1240  | -2.7027 |
| 665SOL | HW2 2029 | 0.699  | 0.482 | 1.028  | 1.9603  | 1.1297  | -0.0597 |
| 666SOL | OW 2030  | 0.170  | 2.736 | 2.164  | 0.1327  | 0.1819  | 0.7704  |
| 666SOL | HW1 2031 | 0.210  | 2.649 | 2.132  | 2.5051  | 1.1691  | 0.8417  |
| 666SOL | HW2 2032 | 0.172  | 2.738 | 2.264  | -0.3180 | 0.1766  | 0.7838  |
| 667SOL | OW 2033  | 1.108  | 0.181 | 0.532  | 0.4571  | -0.2195 | -0.0367 |
| 667SOL | HW1 2034 | 1.106  | 0.215 | 0.626  | 2.1625  | 2.6501  | -0.8975 |
| 667SOL | HW2 2035 | 1.077  | 0.254 | 0.470  | -2.1695 | -2.5372 | -1.6764 |
| 668SOL | OW 2036  | 0.017  | 0.938 | 1.840  | 0.1415  | -0.3552 | -0.2608 |
| 668SOL | HW1 2037 | -0.006 | 0.845 | 1.812  | 0.3880  | -0.1734 | -1.0661 |
| 668SOL | HW2 2038 | 0.062  | 0.985 | 1.766  | 0.9661  | 0.0777  | 0.4989  |
| 669SOL | OW 2039  | 0.674  | 2.310 | 2.073  | 0.0622  | -0.0378 | 0.1743  |
| 669SOL | HW1 2040 | 0.738  | 2.234 | 2.062  | 0.8224  | 0.6828  | -0.4391 |
| 669SOL | HW2 2041 | 0.584  | 2.273 | 2.098  | 0.5435  | -1.0993 | 0.4405  |
| 670SOL | OW 2042  | 1.310  | 1.586 | 2.169  | 0.1669  | -0.9857 | -0.1427 |
| 670SOL | HW1 2043 | 1.291  | 1.682 | 2.190  | 1.0358  | -0.6556 | -0.8094 |
| 670SOL | HW2 2044 | 1.233  | 1.529 | 2.198  | 0.5978  | -0.3968 | 2.4805  |
| 671SOL | OW 2045  | 1.552  | 2.293 | 0.513  | 0.5034  | 0.3081  | -0.1792 |
| 671SOL | HW1 2046 | 1.562  | 2.309 | 0.611  | -1.5399 | -0.6911 | 0.2492  |
| 671SOL | HW2 2047 | 1.629  | 2.239 | 0.480  | 0.9160  | 0.1516  | 0.9964  |
| 672SOL | OW 2048  | 1.605  | 1.451 | 1.962  | -0.0526 | -0.2594 | 0.3136  |
| 672SOL | HW1 2049 | 1.652  | 1.429 | 1.877  | 1.6567  | 1.0174  | 0.8424  |

|        |          |        |       |       |         |         |         |
|--------|----------|--------|-------|-------|---------|---------|---------|
| 672SOL | HW2 2050 | 1.652  | 1.405 | 2.038 | -1.9125 | -1.8641 | 0.5625  |
| 673SOL | OW 2051  | 0.185  | 1.205 | 0.113 | 0.1375  | 0.3453  | 0.2633  |
| 673SOL | HW1 2052 | 0.272  | 1.228 | 0.069 | 0.9061  | -0.6228 | 1.2100  |
| 673SOL | HW2 2053 | 0.145  | 1.125 | 0.068 | 1.1116  | -0.8803 | 1.4774  |
| 674SOL | OW 2054  | 2.444  | 1.814 | 0.616 | 0.1874  | -0.0079 | 0.0663  |
| 674SOL | HW1 2055 | 2.470  | 1.879 | 0.545 | 1.3086  | -0.5196 | -0.0045 |
| 674SOL | HW2 2056 | 2.462  | 1.855 | 0.706 | -0.6567 | 0.4014  | 0.0601  |
| 675SOL | OW 2057  | 1.395  | 1.221 | 1.949 | 0.0474  | -0.1660 | -0.2509 |
| 675SOL | HW1 2058 | 1.428  | 1.313 | 1.970 | -0.9351 | -0.3224 | 2.3276  |
| 675SOL | HW2 2059 | 1.470  | 1.155 | 1.960 | 0.1798  | 0.0786  | 0.3826  |
| 676SOL | OW 2060  | 0.464  | 0.976 | 0.228 | 0.3669  | -0.0774 | 0.2957  |
| 676SOL | HW1 2061 | 0.555  | 0.960 | 0.265 | 0.2051  | -2.6218 | -0.2401 |
| 676SOL | HW2 2062 | 0.431  | 1.065 | 0.258 | 2.2418  | 0.0799  | 2.0845  |
| 677SOL | OW 2063  | 0.116  | 1.095 | 0.788 | 0.0970  | 0.1462  | -0.2775 |
| 677SOL | HW1 2064 | 0.047  | 1.092 | 0.861 | -0.2735 | 1.6145  | -0.5480 |
| 677SOL | HW2 2065 | 0.174  | 1.013 | 0.794 | -0.0655 | 0.1215  | 1.5250  |
| 678SOL | OW 2066  | 2.517  | 0.721 | 0.146 | -0.1473 | -0.4003 | -0.1244 |
| 678SOL | HW1 2067 | 2.438  | 0.774 | 0.179 | 0.9056  | 1.0252  | 0.1997  |
| 678SOL | HW2 2068 | 2.579  | 0.702 | 0.222 | 1.5095  | 1.5368  | -0.8871 |
| 679SOL | OW 2069  | 2.851  | 2.941 | 0.576 | 0.1776  | 0.0836  | -0.3615 |
| 679SOL | HW1 2070 | 2.783  | 2.983 | 0.515 | 0.6929  | -1.4864 | -2.1027 |
| 679SOL | HW2 2071 | 2.915  | 3.012 | 0.607 | 0.8204  | 0.7426  | -2.9341 |
| 680SOL | OW 2072  | 0.650  | 1.257 | 1.043 | 0.4951  | -0.2684 | 0.0547  |
| 680SOL | HW1 2073 | 0.693  | 1.286 | 0.958 | 0.5091  | 1.0116  | 0.4743  |
| 680SOL | HW2 2074 | 0.667  | 1.159 | 1.057 | 1.8578  | -0.1576 | -0.6091 |
| 681SOL | OW 2075  | 0.083  | 1.936 | 1.334 | -0.4621 | 0.5803  | 0.3415  |
| 681SOL | HW1 2076 | 0.079  | 1.867 | 1.407 | -0.0532 | 2.9977  | 2.8144  |
| 681SOL | HW2 2077 | -0.009 | 1.953 | 1.300 | -1.0820 | 1.2326  | 2.2085  |
| 682SOL | OW 2078  | 1.636  | 3.084 | 1.602 | -0.2187 | 0.2809  | -0.1855 |
| 682SOL | HW1 2079 | 1.629  | 3.026 | 1.683 | -0.5884 | 0.6826  | 0.0785  |
| 682SOL | HW2 2080 | 1.568  | 3.055 | 1.534 | -3.9709 | 3.3619  | 1.8607  |
| 683SOL | OW 2081  | 1.626  | 1.886 | 1.875 | -0.6555 | 0.1476  | -0.2306 |
| 683SOL | HW1 2082 | 1.659  | 1.803 | 1.829 | -1.6413 | 0.0576  | -0.8021 |
| 683SOL | HW2 2083 | 1.528  | 1.895 | 1.861 | -0.7594 | 0.7977  | 0.8231  |
| 684SOL | OW 2084  | 1.289  | 0.735 | 1.115 | 0.0639  | -0.2246 | -0.4338 |
| 684SOL | HW1 2085 | 1.196  | 0.748 | 1.149 | 0.5722  | 1.5034  | 0.4267  |
| 684SOL | HW2 2086 | 1.308  | 0.802 | 1.044 | 1.1019  | 0.4258  | 0.4287  |
| 685SOL | OW 2087  | 0.590  | 0.899 | 0.844 | -0.5960 | 0.1462  | -0.4585 |
| 685SOL | HW1 2088 | 0.610  | 0.831 | 0.774 | 1.1258  | -0.0015 | 0.1428  |
| 685SOL | HW2 2089 | 0.671  | 0.956 | 0.861 | -1.8205 | 2.0267  | -0.5678 |
| 686SOL | OW 2090  | 1.597  | 0.182 | 1.136 | -0.1703 | 0.9514  | -0.2511 |
| 686SOL | HW1 2091 | 1.581  | 0.265 | 1.083 | -2.9415 | -0.1833 | -1.3913 |
| 686SOL | HW2 2092 | 1.539  | 0.182 | 1.217 | 0.9857  | 0.7975  | 0.6095  |
| 687SOL | OW 2093  | 2.147  | 2.171 | 0.381 | 0.1022  | 0.1854  | 0.1622  |
| 687SOL | HW1 2094 | 2.086  | 2.092 | 0.377 | -1.0578 | 1.0382  | 0.5394  |
| 687SOL | HW2 2095 | 2.108  | 2.246 | 0.329 | -1.4136 | 2.2138  | 3.8529  |
| 688SOL | OW 2096  | 1.925  | 2.067 | 1.498 | -0.2011 | -0.0670 | 0.0497  |
| 688SOL | HW1 2097 | 1.926  | 2.146 | 1.559 | 0.5078  | -0.5957 | 0.7369  |
| 688SOL | HW2 2098 | 1.933  | 2.099 | 1.403 | 0.6137  | 0.6678  | 0.3491  |
| 689SOL | OW 2099  | 0.409  | 1.570 | 1.786 | -0.1907 | -0.1467 | -0.0274 |
| 689SOL | HW1 2100 | 0.342  | 1.558 | 1.859 | 1.3079  | 0.4757  | 1.5100  |
| 689SOL | HW2 2101 | 0.497  | 1.532 | 1.815 | -0.0397 | -1.7648 | -2.3432 |

|        |          |       |       |       |         |         |         |
|--------|----------|-------|-------|-------|---------|---------|---------|
| 690SOL | OW 2102  | 2.804 | 0.758 | 1.881 | -0.0843 | -0.0650 | -0.9271 |
| 690SOL | HW1 2103 | 2.900 | 0.748 | 1.856 | 0.3140  | -2.4553 | 1.1191  |
| 690SOL | HW2 2104 | 2.797 | 0.803 | 1.970 | -0.9771 | 1.1522  | -1.5786 |
| 691SOL | OW 2105  | 3.153 | 0.127 | 1.233 | -0.2333 | 0.0279  | -0.2857 |
| 691SOL | HW1 2106 | 3.149 | 0.047 | 1.292 | 0.4183  | -0.2008 | -0.5370 |
| 691SOL | HW2 2107 | 3.061 | 0.164 | 1.220 | -0.3323 | 0.4244  | 1.3261  |
| 692SOL | OW 2108  | 1.816 | 2.069 | 1.830 | 0.2784  | 0.1872  | 0.4123  |
| 692SOL | HW1 2109 | 1.750 | 1.995 | 1.840 | 1.3943  | -0.6846 | 1.7585  |
| 692SOL | HW2 2110 | 1.834 | 2.110 | 1.920 | 1.1090  | 0.7976  | -0.0208 |
| 693SOL | OW 2111  | 2.733 | 1.486 | 0.510 | 0.7267  | -0.1696 | 0.5475  |
| 693SOL | HW1 2112 | 2.664 | 1.439 | 0.456 | 0.0542  | 0.6876  | 0.6339  |
| 693SOL | HW2 2113 | 2.821 | 1.440 | 0.500 | 0.5652  | -0.1829 | -1.0586 |
| 694SOL | OW 2114  | 1.373 | 1.378 | 0.105 | 0.0040  | -1.3651 | 0.1880  |
| 694SOL | HW1 2115 | 1.444 | 1.448 | 0.113 | 1.0823  | -2.5948 | 2.1422  |
| 694SOL | HW2 2116 | 1.339 | 1.376 | 0.011 | -0.7060 | 2.3074  | 0.1947  |
| 695SOL | OW 2117  | 2.385 | 1.325 | 2.125 | 0.1288  | 0.0170  | 0.3487  |
| 695SOL | HW1 2118 | 2.408 | 1.415 | 2.088 | 0.5942  | 0.2030  | 1.0693  |
| 695SOL | HW2 2119 | 2.338 | 1.335 | 2.213 | -1.8399 | -0.3936 | -0.6019 |
| 696SOL | OW 2120  | 1.557 | 1.222 | 1.645 | 0.3261  | 0.2597  | 0.1006  |
| 696SOL | HW1 2121 | 1.599 | 1.133 | 1.660 | 1.9487  | 0.7148  | -1.4116 |
| 696SOL | HW2 2122 | 1.618 | 1.294 | 1.678 | -0.6879 | 0.8535  | 0.7391  |
| 697SOL | OW 2123  | 1.982 | 2.916 | 1.847 | 0.5946  | -0.1925 | -0.3093 |
| 697SOL | HW1 2124 | 2.035 | 2.832 | 1.861 | 1.3644  | 0.3207  | -0.0621 |
| 697SOL | HW2 2125 | 2.021 | 2.989 | 1.903 | 1.0072  | 0.7716  | -1.7872 |
| 698SOL | OW 2126  | 2.941 | 2.151 | 1.939 | -0.0312 | 0.5622  | -0.2355 |
| 698SOL | HW1 2127 | 3.007 | 2.130 | 1.866 | -0.1666 | 1.7024  | -0.7051 |
| 698SOL | HW2 2128 | 2.982 | 2.214 | 2.004 | -0.7664 | 1.6112  | -0.7558 |
| 699SOL | OW 2129  | 2.103 | 2.528 | 2.147 | -0.1576 | -0.1012 | -0.1222 |
| 699SOL | HW1 2130 | 2.161 | 2.447 | 2.149 | 0.1042  | 0.0935  | 0.0887  |
| 699SOL | HW2 2131 | 2.069 | 2.548 | 2.239 | -0.8033 | -0.3869 | -0.2881 |
| 700SOL | OW 2132  | 0.278 | 0.900 | 1.116 | 0.3774  | -0.0163 | -0.5565 |
| 700SOL | HW1 2133 | 0.277 | 0.851 | 1.029 | 1.9289  | -0.8131 | -0.1739 |
| 700SOL | HW2 2134 | 0.255 | 0.836 | 1.190 | 1.9684  | -0.1204 | -0.1010 |
| 701SOL | OW 2135  | 2.760 | 1.990 | 0.660 | -0.4034 | -0.2732 | 0.0259  |
| 701SOL | HW1 2136 | 2.846 | 2.035 | 0.684 | -0.2988 | -0.5980 | 0.2610  |
| 701SOL | HW2 2137 | 2.690 | 2.060 | 0.642 | -0.0916 | -0.0089 | -0.1760 |
| 702SOL | OW 2138  | 2.841 | 2.843 | 1.704 | -0.1026 | 0.0621  | 0.1826  |
| 702SOL | HW1 2139 | 2.814 | 2.800 | 1.618 | -0.2965 | -2.1927 | 1.2703  |
| 702SOL | HW2 2140 | 2.856 | 2.771 | 1.773 | -2.3502 | 1.8041  | 2.7276  |
| 703SOL | OW 2141  | 0.254 | 2.077 | 2.044 | -0.3367 | 0.3352  | 0.1022  |
| 703SOL | HW1 2142 | 0.238 | 1.979 | 2.058 | -0.6473 | 0.6971  | 2.8227  |
| 703SOL | HW2 2143 | 0.173 | 2.117 | 1.999 | 0.4511  | -0.8413 | -2.6099 |
| 704SOL | OW 2144  | 3.086 | 0.371 | 1.556 | -0.3054 | -0.0831 | 0.2370  |
| 704SOL | HW1 2145 | 3.069 | 0.451 | 1.498 | 0.9167  | 0.8244  | 1.0673  |
| 704SOL | HW2 2146 | 3.085 | 0.400 | 1.652 | 0.2891  | -1.0541 | 0.5463  |
| 705SOL | OW 2147  | 3.124 | 2.608 | 1.522 | 0.7911  | -0.4414 | 0.0687  |
| 705SOL | HW1 2148 | 3.126 | 2.689 | 1.579 | -1.4793 | 0.1341  | -0.5604 |
| 705SOL | HW2 2149 | 3.122 | 2.526 | 1.580 | 0.7059  | 0.0505  | 0.7658  |
| 706SOL | OW 2150  | 2.304 | 0.046 | 1.851 | 0.1691  | 0.5535  | 0.0298  |
| 706SOL | HW1 2151 | 2.386 | 0.070 | 1.798 | 1.1306  | 1.4054  | 1.8261  |
| 706SOL | HW2 2152 | 2.237 | 0.119 | 1.844 | -0.0861 | 0.2584  | -0.7139 |
| 707SOL | OW 2153  | 1.848 | 0.750 | 2.036 | -0.1389 | 0.1652  | -0.1315 |

|         |         |         |         |         |         |         |         |                 |
|---------|---------|---------|---------|---------|---------|---------|---------|-----------------|
| 707SOL  | HW1     | 2154    | 1.880   | 0.844   | 2.045   | 0.5599  | 0.0605  | -1.2476         |
| 707SOL  | HW2     | 2155    | 1.751   | 0.749   | 2.010   | -0.5084 | 0.5340  | 1.1837          |
| 708SOL  | OW      | 2156    | 1.138   | 2.956   | 1.002   | -0.1002 | -0.3238 | -0.1999         |
| 708SOL  | HW1     | 2157    | 1.236   | 2.971   | 1.012   | 0.2628  | -2.7968 | 0.5981          |
| 708SOL  | HW2     | 2158    | 1.117   | 2.938   | 0.906   | 0.6266  | -2.0205 | -0.0667         |
| 709SOL  | OW      | 2159    | 2.532   | 0.125   | 1.733   | -0.5473 | 0.7757  | 0.4206          |
| 709SOL  | HW1     | 2160    | 2.587   | 0.198   | 1.693   | -0.2094 | 0.5635  | 0.4971          |
| 709SOL  | HW2     | 2161    | 2.589   | 0.044   | 1.747   | -0.1589 | 1.4193  | 3.0862          |
| 710SOL  | OW      | 2162    | 3.054   | 2.296   | 2.110   | 0.0531  | 0.3948  | -0.0059         |
| 710SOL  | HW1     | 2163    | 3.096   | 2.277   | 2.199   | 0.0080  | -1.6929 | -0.3881         |
| 710SOL  | HW2     | 2164    | 3.125   | 2.315   | 2.043   | 0.2463  | -0.5001 | -0.0634         |
| 711SOL  | OW      | 2165    | 1.364   | 1.528   | 0.751   | 0.2156  | -0.3889 | -0.1157         |
| 711SOL  | HW1     | 2166    | 1.389   | 1.608   | 0.697   | 1.4811  | -0.3244 | 0.5263          |
| 711SOL  | HW2     | 2167    | 1.312   | 1.464   | 0.694   | -0.8835 | 0.9061  | -0.6166         |
| 712SOL  | OW      | 2168    | 1.260   | 0.467   | 0.756   | -0.1015 | 0.1343  | -0.7266         |
| 712SOL  | HW1     | 2169    | 1.318   | 0.499   | 0.830   | -2.0514 | 0.1355  | 0.8891          |
| 712SOL  | HW2     | 2170    | 1.207   | 0.387   | 0.786   | -1.9252 | 0.9315  | -1.6214         |
| 3.13000 | 3.13000 | 2.21324 | 0.00000 | 0.00000 | 0.00000 | 0.00000 | 0.00000 | 1.56500 1.56500 |

#### 4. CARTESIAN COORDINATES OF DASPMI IN S0 STATE ( $\xi_1$ - $\xi_2$ grid)

The cartesian coordinates are collected following the order:

i-0, i-30, i-60, i-90, i-120, i-150, i-180, i-210, i-240, i-270, i-300

with i=0, 30, 60, 90

The Dalton format has been used (the atoms are separately reported according to their atomic number.)

BASIS

6-31G\*

ground

Atomtypes=3 Charge=1 Nosymmetry Angstrom

6. 16

|   |        |        |        |
|---|--------|--------|--------|
| c | -1.696 | 1.405  | -0.001 |
| c | -0.810 | 0.296  | 0.000  |
| c | -1.404 | -0.993 | 0.001  |
| c | -2.768 | -1.163 | 0.001  |
| c | -3.652 | -0.042 | -0.001 |
| c | -3.063 | 1.254  | -0.001 |
| c | -5.597 | -1.553 | 0.007  |
| c | 0.600  | 0.541  | -0.001 |
| c | 1.589  | -0.414 | 0.001  |

c 3.019 -0.360 0.002  
c 5.186 0.702 -0.001  
c 5.849 -0.494 -0.002  
c 5.090 -1.681 -0.001  
c 3.718 -1.600 0.002  
c -5.898 0.959 -0.005  
c 3.218 2.136 0.007

1. 19

h -6.931 0.616 -0.009  
h -5.746 1.580 0.883  
h -5.740 1.576 -0.897  
h -6.681 -1.464 0.013  
h -5.306 -2.121 -0.882  
h -5.295 -2.114 0.898  
h -3.169 -2.165 0.001  
h -0.781 -1.878 0.002  
h 0.851 1.591 -0.002  
h 1.248 -1.443 0.002  
h 5.706 1.647 -0.001  
h 3.123 -2.502 0.001  
h 5.581 -2.644 -0.002  
h 6.929 -0.510 -0.003  
h -3.688 2.134 -0.002  
h -1.281 2.407 -0.001  
h 4.020 2.871 0.009  
h 2.610 2.279 -0.887  
h 2.611 2.274 0.902

7. 2

n -5.005 -0.208 -0.002  
n 3.812 0.782 0.003

BASIS

6-31G\*

ground

Atomtypes=3 Charge=1 Nosymmetry Angstrom

6. 16

c -1.644 1.320 -0.383  
c -0.791 0.235 -0.056  
c -1.418 -0.990 0.283  
c -2.786 -1.123 0.303  
c -3.639 -0.026 -0.019  
c -3.015 1.207 -0.366  
c -5.621 -1.438 0.354  
c 0.626 0.428 -0.108  
c 1.596 -0.506 0.153  
c 3.021 -0.408 0.043  
c 5.122 0.772 0.033  
c 5.827 -0.359 -0.276  
c 5.128 -1.577 -0.390  
c 3.763 -1.588 -0.226  
c -5.861 0.984 -0.336  
c 3.131 2.021 0.669



1. 19

h -6.901 0.677 -0.254  
h -5.697 1.823 0.349  
h -5.685 1.328 -1.362  
h -6.702 -1.326 0.319  
h -5.335 -2.227 -0.348  
h -5.343 -1.749 1.366  
h -3.215 -2.077 0.567  
h -0.817 -1.856 0.537  
h 0.922 1.424 -0.416  
h 1.272 -1.523 0.348  
h 5.599 1.732 0.162  
h 3.206 -2.510 -0.327  
h 5.659 -2.493 -0.615  
h 6.898 -0.305 -0.409  
h -3.616 2.065 -0.623  
h -1.202 2.272 -0.656  
h 3.887 2.620 1.174  
h 2.733 2.585 -0.174  
h 2.330 1.789 1.370

7. 2

n -4.997 -0.155 0.000  
n 3.758 0.756 0.213

BASIS

6-31G\*

ground

Atomtypes=3 Charge=1 Nosymmetry Angstrom

6. 16

c -1.610 1.176 -0.673  
c -0.779 0.182 -0.101  
c -1.427 -0.926 0.499  
c -2.799 -1.029 0.537  
c -3.630 -0.021 -0.032  
c -2.984 1.089 -0.644  
c -5.641 -1.277 0.637  
c 0.645 0.336 -0.171  
c 1.604 -0.514 0.305  
c 3.023 -0.406 0.039  
c 5.109 0.784 0.152  
c 5.796 -0.260 -0.411  
c 5.095 -1.437 -0.729  
c 3.737 -1.501 -0.494  
c -5.831 0.921 -0.600  
c 3.123 1.858 1.091

1. 19

h -6.878 0.664 -0.453  
h -5.652 1.897 -0.136  
h -5.647 1.006 -1.676  
h -6.720 -1.150 0.584  
h -5.381 -2.210 0.127  
h -5.361 -1.363 1.693

h -3.244 -1.894 1.006  
h -0.840 -1.719 0.947  
h 0.975 1.243 -0.673  
h 1.306 -1.492 0.672  
h 5.589 1.708 0.437  
h 3.174 -2.388 -0.744  
h 5.615 -2.280 -1.164  
h 6.857 -0.168 -0.590  
h -3.570 1.877 -1.095  
h -1.150 2.035 -1.150  
h 3.871 2.344 1.717  
h 2.734 2.574 0.368  
h 2.308 1.486 1.708

7. 2

n -4.992 -0.120 0.006  
n 3.762 0.707 0.400

BASIS

6-31G\*

ground

Atomtypes=3 Charge=1 Nosymmetry Angstrom

6. 16

c -1.599 0.826 -1.100  
c -0.779 0.053 -0.252  
c -1.429 -0.752 0.708  
c -2.804 -0.785 0.817  
c -3.629 -0.003 -0.040  
c -2.977 0.807 -1.006  
c -5.645 -0.877 1.073  
c 0.657 0.118 -0.407  
c 1.605 -0.544 0.297  
c 3.045 -0.404 0.019  
c 5.111 0.735 0.439  
c 5.788 -0.078 -0.448  
c 5.085 -1.080 -1.120  
c 3.722 -1.233 -0.879  
c -5.826 0.777 -0.829  
c 3.098 1.471 1.643

1. 19

h -6.874 0.617 -0.581  
h -5.609 1.845 -0.721  
h -5.678 0.496 -1.879  
h -6.723 -0.748 1.002  
h -5.419 -1.938 0.916  
h -5.335 -0.602 2.088  
h -3.252 -1.420 1.566  
h -0.846 -1.370 1.382  
h 0.994 0.782 -1.203  
h 1.345 -1.238 1.092  
h 5.598 1.527 0.986  
h 3.148 -1.997 -1.384  
h 5.592 -1.730 -1.821

h 6.845 0.074 -0.606  
h -3.554 1.418 -1.682  
h -1.135 1.455 -1.853  
h 3.838 2.156 2.051  
h 2.306 2.025 1.146  
h 2.666 0.872 2.444  
7. 2  
n -4.995 -0.034 0.066  
n 3.776 0.572 0.664  
BASIS  
6-31G\*  
ground

Atomtypes=3 Charge=1 Nosymmetry Angstrom

6. 16  
c -1.619 0.364 -1.381  
c -0.780 -0.082 -0.332  
c -1.414 -0.479 0.869  
c -2.782 -0.446 1.012  
c -3.623 -0.003 -0.050  
c -2.991 0.403 -1.256  
c -5.615 -0.403 1.342  
c 0.641 -0.095 -0.531  
c 1.612 -0.472 0.352  
c 3.021 -0.343 0.048  
c 5.165 0.609 0.572  
c 5.741 0.047 -0.541  
c 4.940 -0.716 -1.406  
c 3.601 -0.902 -1.107  
c -5.834 0.497 -1.011  
c 3.257 1.121 2.033  
1. 19  
h -6.874 0.456 -0.698  
h -5.599 1.531 -1.284  
h -5.718 -0.133 -1.900  
h -6.694 -0.308 1.245  
h -5.383 -1.449 1.567  
h -5.294 0.217 2.187  
h -3.219 -0.765 1.948  
h -0.820 -0.830 1.706  
h 0.967 0.236 -1.516  
h 1.349 -0.705 1.379  
h 5.722 1.213 1.272  
h 2.971 -1.516 -1.734  
h 5.370 -1.170 -2.289  
h 6.793 0.200 -0.733  
h -3.583 0.745 -2.091  
h -1.168 0.681 -2.316  
h 3.967 1.861 2.395  
h 2.328 1.612 1.743  
h 3.055 0.395 2.822  
7. 2

n -4.983 0.029 0.089  
n 3.834 0.444 0.845

BASIS  
6-31G\*  
ground

Atomtypes=3 Charge=1 Nosymmetry Angstrom

6. 16

c -1.672 -0.004 -1.475  
c -0.804 -0.079 -0.357  
c -1.411 -0.122 0.924  
c -2.777 -0.100 1.079  
c -3.647 -0.031 -0.051  
c -3.042 0.017 -1.339  
c -5.608 -0.057 1.437  
c 0.607 -0.093 -0.574  
c 1.605 -0.146 0.364  
c 2.997 -0.156 0.028  
c 5.267 0.403 0.611  
c 5.754 -0.107 -0.564  
c 4.843 -0.661 -1.485  
c 3.499 -0.686 -1.184  
c -5.883 0.060 -1.072  
c 3.477 1.013 2.169

1. 19

h -6.918 0.070 -0.739  
h -5.702 0.974 -1.651  
h -5.743 -0.805 -1.729  
h -6.690 -0.031 1.337  
h -5.336 -0.975 1.968  
h -5.300 0.803 2.043  
h -3.191 -0.137 2.074  
h -0.794 -0.180 1.813  
h 0.902 -0.043 -1.620  
h 1.342 -0.105 1.414  
h 5.909 0.838 1.363  
h 2.798 -1.156 -1.859  
h 5.200 -1.084 -2.415  
h 6.815 -0.084 -0.762  
h -3.656 0.072 -2.224  
h -1.244 0.038 -2.470  
h 4.324 1.508 2.638  
h 2.700 1.750 1.958  
h 3.088 0.253 2.847

7. 2

n -5.002 -0.012 0.100  
n 3.928 0.395 0.899

BASIS  
6-31G\*  
ground

Atomtypes=3 Charge=1 Nosymmetry Angstrom

6. 16

c -1.705 -1.518 -0.070  
c -0.814 -0.412 -0.018  
c -1.404 0.877 0.042  
c -2.767 1.053 0.050  
c -3.655 -0.063 -0.002  
c -3.070 -1.361 -0.063  
c -5.593 1.454 0.067  
c 0.591 -0.655 -0.030  
c 1.602 0.274 0.014  
c 2.994 -0.038 -0.001  
c 5.281 0.738 0.036  
c 5.778 -0.534 -0.022  
c 4.866 -1.609 -0.073  
c 3.515 -1.358 -0.062  
c -5.905 -1.055 -0.046  
c 3.490 2.402 0.110

1. 19

h -6.936 -0.706 -0.024  
h -5.758 -1.630 -0.965  
h -5.748 -1.715 0.813  
h -6.677 1.370 0.055  
h -5.300 1.975 0.984  
h -5.289 2.059 -0.794  
h -3.165 2.056 0.097  
h -0.774 1.758 0.083  
h 0.857 -1.706 -0.079  
h 1.327 1.317 0.062  
h 5.920 1.607 0.076  
h 2.820 -2.181 -0.100  
h 5.228 -2.626 -0.119  
h 6.846 -0.696 -0.029  
h -3.699 -2.237 -0.103  
h -1.293 -2.520 -0.117  
h 4.368 3.042 0.139  
h 2.897 2.651 -0.771  
h 2.899 2.571 1.013

7. 2

n -5.007 0.108 0.005  
n 3.931 0.989 0.046

BASIS

6-31G\*

ground

Atomtypes=3 Charge=1 Nosymmetry Angstrom

6. 16

c -1.672 -0.013 1.475  
c -0.803 -0.083 0.357  
c -1.412 -0.118 -0.925  
c -2.777 -0.094 -1.079  
c -3.647 -0.031 0.051  
c -3.041 0.009 1.339

c -5.608 -0.053 -1.437  
c 0.607 -0.098 0.574  
c 1.605 -0.146 -0.366  
c 2.997 -0.158 -0.029  
c 5.267 0.408 -0.605  
c 5.752 -0.103 0.569  
c 4.841 -0.665 1.486  
c 3.498 -0.693 1.183  
c -5.883 0.059 1.074  
c 3.479 1.019 -2.165

1. 19

h -6.917 0.071 0.741  
h -5.742 -0.810 1.726  
h -5.701 0.968 1.657  
h -6.692 -0.037 -1.334  
h -5.309 0.811 -2.040  
h -5.330 -0.968 -1.970  
h -3.192 -0.124 -2.075  
h -0.795 -0.171 -1.814  
h 0.902 -0.055 1.619  
h 1.343 -0.099 -1.414  
h 5.909 0.847 -1.354  
h 2.798 -1.167 1.853  
h 5.198 -1.090 2.414  
h 6.813 -0.078 0.769  
h -3.656 0.058 2.226  
h -1.243 0.021 2.471  
h 4.327 1.512 -2.634  
h 3.087 0.260 -2.844  
h 2.704 1.757 -1.953

7. 2

n -5.001 -0.007 -0.099  
n 3.928 0.399 -0.896

BASIS

6-31G\*

ground

Atomtypes=3 Charge=1 Nosymmetry Angstrom

6. 16

c -1.620 0.368 1.379  
c -0.780 -0.079 0.333  
c -1.414 -0.478 -0.869  
c -2.782 -0.445 -1.012  
c -3.624 -0.002 0.049  
c -2.991 0.407 1.255  
c -5.615 -0.395 -1.345  
c 0.641 -0.093 0.531  
c 1.612 -0.472 -0.351  
c 3.021 -0.343 -0.045  
c 5.166 0.607 -0.570  
c 5.741 0.046 0.544  
c 4.939 -0.715 1.409

c 3.600 -0.902 1.110  
c -5.834 0.482 1.018  
c 3.258 1.119 -2.031

1. 19

h -6.876 0.409 0.717  
h -5.690 -0.138 1.909  
h -5.625 1.525 1.281  
h -6.694 -0.293 -1.250  
h -5.288 0.224 -2.187  
h -5.391 -1.443 -1.572  
h -3.217 -0.764 -1.948  
h -0.819 -0.830 -1.705  
h 0.967 0.238 1.517  
h 1.350 -0.705 -1.377  
h 5.723 1.209 -1.270  
h 2.970 -1.515 1.736  
h 5.369 -1.169 2.292  
h 6.793 0.198 0.736  
h -3.584 0.754 2.088  
h -1.169 0.688 2.314  
h 3.969 1.858 -2.396  
h 3.052 0.393 -2.819  
h 2.330 1.612 -1.740

7. 2

n -4.983 0.029 -0.090  
n 3.835 0.442 -0.842

BASIS

6-31G\*

ground

Atomtypes=3 Charge=1 Nosymmetry Angstrom

6. 16

c -1.600 0.824 1.102  
c -0.779 0.050 0.254  
c -1.431 -0.754 -0.706  
c -2.806 -0.784 -0.817  
c -3.630 -0.001 0.039  
c -2.978 0.807 1.006  
c -5.644 -0.883 -1.069  
c 0.658 0.116 0.410  
c 1.607 -0.545 -0.294  
c 3.047 -0.405 -0.016  
c 5.111 0.736 -0.438  
c 5.790 -0.075 0.447  
c 5.089 -1.078 1.119  
c 3.726 -1.233 0.882  
c -5.825 0.785 0.824  
c 3.092 1.466 -1.638

1. 19

h -6.873 0.622 0.583  
h -5.671 0.514 1.875  
h -5.610 1.853 0.707

h -6.723 -0.766 -0.990  
h -5.347 -0.606 -2.087  
h -5.405 -1.940 -0.913  
h -3.256 -1.419 -1.566  
h -0.850 -1.374 -1.380  
h 0.995 0.780 1.206  
h 1.349 -1.239 -1.089  
h 5.598 1.528 -0.986  
h 3.154 -1.998 1.387  
h 5.598 -1.727 1.820  
h 6.848 0.078 0.604  
h -3.557 1.419 1.682  
h -1.137 1.452 1.856  
h 3.830 2.140 -2.069  
h 2.638 0.865 -2.424  
h 2.315 2.037 -1.134

7. 2

n -4.996 -0.030 -0.069  
n 3.775 0.572 -0.662

BASIS

6-31G\*

ground

Atomtypes=3 Charge=1 Nosymmetry Angstrom

6. 16

c -1.610 1.180 0.667  
c -0.780 0.185 0.099  
c -1.427 -0.925 -0.499  
c -2.798 -1.029 -0.538  
c -3.630 -0.020 0.031  
c -2.984 1.093 0.638  
c -5.641 -1.271 -0.650  
c 0.644 0.338 0.169  
c 1.604 -0.514 -0.303  
c 3.022 -0.406 -0.036  
c 5.110 0.783 -0.149  
c 5.795 -0.261 0.416  
c 5.093 -1.436 0.736  
c 3.735 -1.500 0.500  
c -5.831 0.907 0.623  
c 3.127 1.855 -1.097

1. 19

h -6.876 0.620 0.524  
h -5.604 1.008 1.689  
h -5.697 1.882 0.141  
h -6.719 -1.135 -0.611  
h -5.347 -1.354 -1.701  
h -5.395 -2.208 -0.140  
h -3.243 -1.895 -1.004  
h -0.839 -1.718 -0.945  
h 0.974 1.248 0.668  
h 1.304 -1.493 -0.662



h 5.591 1.706 -0.436  
h 3.170 -2.386 0.752  
h 5.611 -2.281 1.172  
h 6.857 -0.171 0.595  
h -3.570 1.884 1.081  
h -1.151 2.041 1.140  
h 3.876 2.334 -1.725  
h 2.313 1.480 -1.713  
h 2.736 2.576 -0.379  
7. 2  
n -4.991 -0.121 -0.006  
n 3.763 0.707 -0.396

BASIS  
6-31G\*  
ground

Atomtypes=3 Charge=1 Nosymmetry Angstrom

6. 16  
c -1.696 1.405 -0.001  
c -0.810 0.296 0.000  
c -1.404 -0.993 0.001  
c -2.768 -1.163 0.001  
c -3.652 -0.042 -0.001  
c -3.063 1.254 -0.001  
c -5.597 -1.553 0.007  
c 0.600 0.541 -0.001  
c 1.589 -0.414 0.001  
c 3.019 -0.360 0.002  
c 5.186 0.702 -0.001  
c 5.849 -0.494 -0.002  
c 5.090 -1.681 -0.001  
c 3.718 -1.600 0.002  
c -5.898 0.959 -0.005  
c 3.218 2.136 0.007  
1. 19  
h -6.931 0.616 -0.009  
h -5.746 1.580 0.883  
h -5.740 1.576 -0.897  
h -6.681 -1.464 0.013  
h -5.306 -2.121 -0.882  
h -5.295 -2.114 0.898  
h -3.169 -2.165 0.001  
h -0.781 -1.878 0.002  
h 0.851 1.591 -0.002  
h 1.248 -1.443 0.002  
h 5.706 1.647 -0.001  
h 3.123 -2.502 0.001  
h 5.581 -2.644 -0.002  
h 6.929 -0.510 -0.003  
h -3.688 2.134 -0.002  
h -1.281 2.407 -0.001  
h 4.020 2.871 0.009

h 2.610 2.279 -0.887  
h 2.611 2.274 0.902  
7. 2  
n -5.005 -0.208 -0.002  
n 3.812 0.782 0.003

BASIS  
6-31G\*  
ground

Atomtypes=3 Charge=1 Nosymmetry Angstrom

6. 16  
c -1.634 1.233 -0.634  
c -0.786 0.259 -0.051  
c -1.415 -0.828 0.606  
c -2.783 -0.971 0.623  
c -3.629 -0.022 -0.021  
c -3.003 1.096 -0.643  
c -5.614 -1.327 0.628  
c 0.631 0.465 -0.038  
c 1.584 -0.519 0.046  
c 3.011 -0.415 -0.033  
c 5.114 0.738 0.182  
c 5.814 -0.312 -0.348  
c 5.109 -1.481 -0.700  
c 3.744 -1.520 -0.536  
c -5.845 0.834 -0.666  
c 3.134 1.841 1.069

1. 19  
h -6.884 0.528 -0.567  
h -5.732 1.816 -0.195  
h -5.617 0.928 -1.733  
h -6.689 -1.284 0.468  
h -5.243 -2.267 0.208  
h -5.429 -1.327 1.708  
h -3.215 -1.808 1.153  
h -0.808 -1.557 1.132  
h 0.943 1.483 -0.253  
h 1.237 -1.546 0.050  
h 5.594 1.652 0.498  
h 3.183 -2.401 -0.817  
h 5.637 -2.334 -1.104  
h 6.884 -0.235 -0.473  
h -3.603 1.855 -1.123  
h -1.191 2.101 -1.109  
h 3.881 2.285 1.724  
h 2.786 2.592 0.360  
h 2.299 1.486 1.669

7. 2  
n -4.986 -0.170 -0.024  
n 3.752 0.691 0.362

BASIS  
6-31G\*

ground

Atomtypes=3 Charge=1 Nosymmetry Angstrom

6. 16

c -1.606 1.036 -0.898  
c -0.778 0.214 -0.098  
c -1.424 -0.687 0.781  
c -2.796 -0.805 0.817  
c -3.624 -0.017 -0.033  
c -2.979 0.919 -0.888  
c -5.633 -1.112 0.879  
c 0.646 0.398 -0.116  
c 1.592 -0.539 0.193  
c 3.014 -0.404 -0.039  
c 5.113 0.715 0.302  
c 5.789 -0.210 -0.453  
c 5.073 -1.294 -0.994  
c 3.712 -1.382 -0.776  
c -5.823 0.701 -0.874  
c 3.139 1.615 1.430

1. 19

h -6.867 0.437 -0.722  
h -5.701 1.764 -0.635  
h -5.583 0.551 -1.932  
h -6.707 -1.087 0.707  
h -5.280 -2.130 0.681  
h -5.450 -0.875 1.933  
h -3.243 -1.495 1.518  
h -0.831 -1.287 1.462  
h 0.985 1.352 -0.520  
h 1.268 -1.559 0.376  
h 5.606 1.559 0.761  
h 3.136 -2.197 -1.195  
h 5.582 -2.044 -1.584  
h 6.851 -0.101 -0.610  
h -3.564 1.555 -1.534  
h -1.146 1.769 -1.555  
h 3.888 1.956 2.142  
h 2.766 2.464 0.858  
h 2.313 1.144 1.958

7. 2

n -4.985 -0.142 -0.012  
n 3.766 0.609 0.530

BASIS

6-31G\*

ground

Atomtypes=3 Charge=1 Nosymmetry Angstrom

6. 16

c -1.622 0.631 -1.273  
c -0.781 0.130 -0.260  
c -1.403 -0.386 0.896

c -2.778 -0.452 1.012  
c -3.625 0.005 -0.035  
c -2.998 0.560 -1.181  
c -5.614 -0.650 1.262  
c 0.658 0.240 -0.395  
c 1.590 -0.556 0.178  
c 3.036 -0.396 -0.059  
c 5.121 0.598 0.572  
c 5.787 -0.052 -0.445  
c 5.068 -0.898 -1.293  
c 3.701 -1.062 -1.090  
c -5.844 0.441 -1.007  
c 3.113 1.145 1.883

1. 19

h -6.887 0.285 -0.737  
h -5.692 1.515 -1.165  
h -5.655 -0.079 -1.952  
h -6.693 -0.669 1.124  
h -5.276 -1.678 1.429  
h -5.396 -0.060 2.159  
h -3.207 -0.842 1.924  
h -0.795 -0.724 1.728  
h 1.003 1.002 -1.096  
h 1.299 -1.393 0.809  
h 5.621 1.263 1.259  
h 3.117 -1.709 -1.729  
h 5.568 -1.419 -2.099  
h 6.849 0.104 -0.569  
h -3.596 0.941 -1.995  
h -1.178 1.070 -2.162  
h 3.867 1.702 2.433  
h 2.359 1.823 1.488  
h 2.633 0.420 2.540

7. 2

n -4.991 -0.072 0.068  
n 3.782 0.426 0.758

BASIS

6-31G\*

ground

Atomtypes=3 Charge=1 Nosymmetry Angstrom

6. 16

c -1.650 0.047 -1.470  
c -0.784 -0.033 -0.355  
c -1.386 -0.017 0.924  
c -2.754 -0.003 1.084  
c -3.623 0.006 -0.043  
c -3.021 0.042 -1.331  
c -5.584 -0.029 1.446  
c 0.642 0.004 -0.557  
c 1.601 -0.489 0.274  
c 3.018 -0.340 -0.003

c 5.170 0.500 0.652  
c 5.751 0.055 -0.511  
c 4.949 -0.590 -1.465  
c 3.601 -0.780 -1.204  
c -5.862 0.056 -1.067  
c 3.253 0.875 2.142

1. 19

h -6.898 0.043 -0.735  
h -5.701 0.970 -1.648  
h -5.703 -0.807 -1.723  
h -6.666 -0.087 1.347  
h -5.247 -0.906 2.010  
h -5.340 0.871 2.020  
h -3.165 0.022 2.082  
h -0.761 -0.001 1.810  
h 0.965 0.389 -1.524  
h 1.322 -0.863 1.255  
h 5.730 1.008 1.423  
h 2.968 -1.306 -1.904  
h 5.382 -0.951 -2.388  
h 6.808 0.208 -0.673  
h -3.637 0.075 -2.217  
h -1.223 0.088 -2.467  
h 3.973 1.549 2.599  
h 2.339 1.417 1.902  
h 3.024 0.064 2.836

7. 2

n -4.983 0.004 0.108  
n 3.834 0.330 0.888

BASIS

6-31G\*

ground

Atomtypes=3 Charge=1 Nosymmetry Angstrom

6. 16

c -1.684 -1.049 -1.077  
c -0.806 -0.244 -0.311  
c -1.400 0.724 0.536  
c -2.766 0.826 0.675  
c -3.644 -0.040 -0.040  
c -3.052 -0.976 -0.935  
c -5.589 1.019 1.036  
c 0.608 -0.337 -0.528  
c 1.596 0.001 0.357  
c 2.997 -0.139 0.076  
c 5.258 0.611 0.433  
c 5.766 -0.346 -0.407  
c 4.872 -1.233 -1.037  
c 3.519 -1.127 -0.791  
c -5.889 -0.834 -0.661  
c 3.437 1.818 1.544

1. 19

h -6.921 -0.621 -0.387  
h -5.780 -0.667 -1.738  
h -5.690 -1.889 -0.448  
h -6.669 0.890 1.044  
h -5.219 0.869 2.056  
h -5.369 2.047 0.729  
h -3.171 1.591 1.320  
h -0.770 1.421 1.077  
h 0.899 -0.812 -1.463  
h 1.315 0.466 1.293  
h 5.886 1.321 0.948  
h 2.830 -1.830 -1.230  
h 5.246 -2.007 -1.694  
h 6.832 -0.409 -0.567  
h -3.675 -1.635 -1.520  
h -1.267 -1.764 -1.777  
h 4.274 2.476 1.766  
h 2.656 2.383 1.037  
h 3.047 1.409 2.478  
7. 2  
n -4.998 0.043 0.110  
n 3.911 0.727 0.659

BASIS

6-31G\*

ground

Atomtypes=3 Charge=1 Nosymmetry Angstrom

6. 16

c -1.707 -0.146 1.508  
c -0.813 -0.155 0.408  
c -1.393 -0.177 -0.888  
c -2.755 -0.119 -1.072  
c -3.645 -0.039 0.038  
c -3.071 -0.065 1.341  
c -5.571 0.062 -1.493  
c 0.592 -0.281 0.637  
c 1.592 0.123 -0.212  
c 2.990 -0.014 0.045  
c 5.263 0.331 -0.691  
c 5.779 -0.225 0.447  
c 4.884 -0.700 1.427  
c 3.529 -0.595 1.221  
c -5.901 0.084 1.015  
c 3.447 1.058 -2.159

1. 19

h -6.926 0.155 0.660  
h -5.812 -0.821 1.626  
h -5.697 0.955 1.646  
h -6.651 0.167 -1.416  
h -5.185 0.907 -2.073  
h -5.355 -0.864 -2.036  
h -3.148 -0.160 -2.077

h -0.753 -0.271 -1.757  
h 0.859 -0.630 1.631  
h 1.296 0.568 -1.150  
h 5.890 0.713 -1.482  
h 2.844 -0.969 1.968  
h 5.262 -1.148 2.337  
h 6.850 -0.295 0.577  
h -3.705 -0.033 2.214  
h -1.302 -0.179 2.515  
h 4.315 1.338 -2.749  
h 2.845 0.348 -2.728  
h 2.859 1.952 -1.945  
7. 2  
n -4.996 0.039 -0.141  
n 3.910 0.437 -0.895  
BASIS  
6-31G\*  
ground

Atomtypes=3 Charge=1 Nosymmetry Angstrom

6. 16  
c -1.663 0.344 1.419  
c -0.801 -0.089 0.382  
c -1.412 -0.556 -0.809  
c -2.778 -0.534 -0.978  
c -3.637 -0.039 0.046  
c -3.029 0.391 1.259  
c -5.602 -0.455 -1.379  
c 0.610 -0.158 0.610  
c 1.594 -0.103 -0.345  
c 2.993 -0.152 -0.038  
c 5.250 0.479 -0.593  
c 5.756 -0.156 0.511  
c 4.863 -0.811 1.381  
c 3.513 -0.810 1.100  
c -5.864 0.489 0.954  
c 3.429 1.247 -2.045  
1. 19  
h -6.897 0.454 0.616  
h -5.775 -0.134 1.850  
h -5.625 1.524 1.220  
h -6.677 -0.302 -1.325  
h -5.220 0.112 -2.234  
h -5.415 -1.520 -1.550  
h -3.197 -0.920 -1.895  
h -0.795 -0.969 -1.599  
h 0.915 -0.133 1.654  
h 1.304 0.051 -1.376  
h 5.877 0.997 -1.302  
h 2.822 -1.353 1.728  
h 5.236 -1.330 2.253  
h 6.820 -0.151 0.692

h -3.640 0.751 2.075  
h -1.232 0.667 2.361  
h 4.265 1.796 -2.472  
h 3.031 0.561 -2.795  
h 2.652 1.949 -1.742

7. 2

n -4.990 0.003 -0.124  
n 3.905 0.496 -0.858

BASIS

6-31G\*

ground

Atomtypes=3 Charge=1 Nosymmetry Angstrom

6. 16

c -1.589 0.609 1.247  
c -0.776 -0.108 0.340  
c -1.433 -0.820 -0.690  
c -2.802 -0.779 -0.840  
c -3.615 -0.013 0.045  
c -2.959 0.676 1.102  
c -5.632 -0.686 -1.197  
c 0.645 -0.180 0.555  
c 1.601 -0.397 -0.396  
c 3.016 -0.330 -0.102  
c 5.148 0.709 -0.483  
c 5.740 -0.032 0.512  
c 4.953 -0.935 1.243  
c 3.612 -1.075 0.933  
c -5.797 0.796 0.844  
c 3.222 1.450 -1.815

1. 19

h -6.844 0.704 0.559  
h -5.686 0.412 1.864  
h -5.536 1.860 0.840  
h -6.699 -0.475 -1.169  
h -5.250 -0.370 -2.174  
h -5.496 -1.770 -1.102  
h -3.260 -1.356 -1.629  
h -0.852 -1.439 -1.366  
h 0.981 0.050 1.565  
h 1.308 -0.446 -1.440  
h 5.695 1.426 -1.077  
h 2.991 -1.789 1.454  
h 5.396 -1.529 2.032  
h 6.794 0.092 0.715  
h -3.534 1.254 1.811  
h -1.123 1.136 2.073  
h 3.934 2.229 -2.075  
h 2.989 0.860 -2.704  
h 2.307 1.897 -1.427

7. 2

n -4.973 0.040 -0.105



n 3.817 0.585 -0.764

BASIS

6-31G\*

ground

Atomtypes=3 Charge=1 Nosymmetry Angstrom

6. 16

c -1.591 1.018 0.890

c -0.779 0.040 0.279

c -1.435 -1.001 -0.410

c -2.810 -1.034 -0.536

c -3.624 -0.018 0.034

c -2.965 1.007 0.763

c -5.646 -1.114 -0.847

c 0.659 0.076 0.461

c 1.592 -0.438 -0.373

c 3.038 -0.380 -0.094

c 5.113 0.795 -0.305

c 5.790 -0.188 0.386

c 5.081 -1.299 0.851

c 3.714 -1.383 0.607

c -5.812 0.991 0.542

c 3.095 1.787 -1.301

1. 19

h -6.859 0.800 0.317

h -5.691 0.987 1.631

h -5.561 1.991 0.169

h -6.717 -0.923 -0.876

h -5.280 -1.160 -1.878

h -5.486 -2.093 -0.378

h -3.266 -1.862 -1.060

h -0.854 -1.812 -0.835

h 1.005 0.633 1.332

h 1.302 -0.964 -1.280

h 5.605 1.676 -0.689

h 3.136 -2.228 0.954

h 5.588 -2.083 1.397

h 6.851 -0.084 0.556

h -3.540 1.790 1.237

h -1.124 1.810 1.467

h 3.846 2.510 -1.610

h 2.603 1.363 -2.174

h 2.350 2.267 -0.669

7. 2

n -4.988 -0.041 -0.096

n 3.773 0.698 -0.536

BASIS

6-31G\*

ground

Atomtypes=3 Charge=1 Nosymmetry Angstrom

6. 16

c -1.623 1.283 0.442  
c -0.783 0.185 0.139  
c -1.417 -1.047 -0.145  
c -2.789 -1.160 -0.203  
c -3.629 -0.034 0.029  
c -2.996 1.193 0.369  
c -5.626 -1.413 -0.389  
c 0.644 0.324 0.266  
c 1.593 -0.421 -0.370  
c 3.020 -0.381 -0.107  
c 5.120 0.785 -0.025  
c 5.801 -0.358 0.310  
c 5.089 -1.565 0.407  
c 3.725 -1.565 0.189  
c -5.841 1.028 0.239  
c 3.132 2.043 -0.697

1. 19

h -6.883 0.743 0.117  
h -5.702 1.382 1.266  
h -5.630 1.855 -0.447  
h -6.702 -1.266 -0.460  
h -5.270 -1.787 -1.354  
h -5.435 -2.175 0.375  
h -3.226 -2.126 -0.406  
h -0.817 -1.935 -0.301  
h 0.970 1.169 0.870  
h 1.277 -1.300 -0.925  
h 5.609 1.741 -0.132  
h 3.153 -2.480 0.272  
h 5.603 -2.484 0.657  
h 6.867 -0.315 0.480  
h -3.589 2.069 0.584  
h -1.173 2.231 0.720  
h 3.883 2.647 -1.201  
h 2.325 1.805 -1.386  
h 2.732 2.591 0.157

7. 2

n -4.990 -0.135 -0.048  
n 3.768 0.774 -0.252

BASIS

6-31G\*

ground

Atomtypes=3 Charge=1 Nosymmetry Angstrom

6. 16

c -1.656 1.246 -0.562  
c -0.809 0.276 0.023  
c -1.434 -0.804 0.685  
c -2.804 -0.971 0.671  
c -3.646 -0.049 -0.008  
c -3.023 1.076 -0.617  
c -5.628 -1.382 0.588

c 0.608 0.545 0.174  
c 1.580 -0.355 -0.171  
c 3.017 -0.332 -0.128  
c 5.186 0.637 0.269  
c 5.840 -0.464 -0.218  
c 5.072 -1.552 -0.674  
c 3.699 -1.475 -0.624  
c -5.859 0.772 -0.715  
c 3.230 1.942 0.899

1. 19

h -6.894 0.442 -0.656  
h -5.784 1.753 -0.233  
h -5.595 0.880 -1.773  
h -6.695 -1.371 0.381  
h -5.215 -2.318 0.196  
h -5.489 -1.368 1.676  
h -3.234 -1.803 1.209  
h -0.824 -1.514 1.233  
h 0.852 1.578 0.381  
h 1.212 -1.315 -0.517  
h 5.713 1.503 0.639  
h 3.095 -2.298 -0.975  
h 5.556 -2.439 -1.059  
h 6.919 -0.480 -0.239  
h -3.621 1.822 -1.118  
h -1.219 2.129 -1.017  
h 4.030 2.539 1.330  
h 2.732 2.523 0.123  
h 2.523 1.678 1.684

7. 2

n -5.002 -0.220 -0.052  
n 3.815 0.710 0.320

BASIS

6-31G\*

ground

Atomtypes=3 Charge=1 Nosymmetry Angstrom

6. 16

c -1.591 1.014 -0.860  
c -0.788 0.197 -0.031  
c -1.458 -0.658 0.872  
c -2.833 -0.772 0.880  
c -3.634 -0.020 -0.022  
c -2.964 0.889 -0.888  
c -5.668 -1.079 0.871  
c 0.638 0.435 0.062  
c 1.592 -0.538 -0.036  
c 3.024 -0.408 -0.099  
c 5.112 0.710 0.315  
c 5.818 -0.215 -0.408  
c 5.124 -1.303 -0.971  
c 3.758 -1.388 -0.807

c -5.809 0.665 -0.955  
c 3.126 1.611 1.396  
1. 19  
h -6.857 0.399 -0.827  
h -5.701 1.736 -0.747  
h -5.536 0.481 -1.999  
h -6.737 -1.065 0.669  
h -5.308 -2.103 0.728  
h -5.516 -0.799 1.920  
h -3.299 -1.427 1.602  
h -0.878 -1.231 1.588  
h 0.940 1.477 -0.019  
h 1.247 -1.556 -0.184  
h 5.585 1.555 0.791  
h 3.202 -2.206 -1.244  
h 5.656 -2.060 -1.531  
h 6.886 -0.105 -0.522  
h -3.530 1.505 -1.570  
h -1.116 1.737 -1.515  
h 3.866 1.918 2.134  
h 2.791 2.485 0.837  
h 2.281 1.153 1.905  
7. 2  
n -4.996 -0.146 -0.040  
n 3.752 0.613 0.490

BASIS  
6-31G\*  
ground

Atomtypes=3 Charge=1 Nosymmetry Angstrom

6. 16  
c -1.567 0.745 -1.093  
c -0.782 0.174 -0.068  
c -1.463 -0.414 1.017  
c -2.842 -0.512 1.040  
c -3.629 -0.012 -0.031  
c -2.943 0.629 -1.099  
c -5.682 -0.778 1.092  
c 0.655 0.398 -0.039  
c 1.595 -0.572 0.102  
c 3.026 -0.396 -0.098  
c 5.118 0.654 0.425  
c 5.788 -0.108 -0.499  
c 5.073 -1.070 -1.229  
c 3.714 -1.210 -1.017  
c -5.790 0.424 -1.129  
c 3.149 1.323 1.714  
1. 19  
h -6.843 0.214 -0.946  
h -5.668 1.509 -1.213  
h -5.514 -0.033 -2.085  
h -6.752 -0.793 0.892

h -5.345 -1.814 1.216  
h -5.519 -0.243 2.035  
h -3.317 -0.960 1.900  
h -0.895 -0.791 1.860  
h 0.986 1.399 -0.322  
h 1.270 -1.607 0.162  
h 5.611 1.399 1.032  
h 3.137 -1.934 -1.575  
h 5.580 -1.693 -1.955  
h 6.850 0.037 -0.641  
h -3.498 1.048 -1.925  
h -1.081 1.262 -1.913  
h 3.904 1.532 2.470  
h 2.772 2.260 1.305  
h 2.329 0.764 2.156

7. 2

n -4.996 -0.124 -0.025  
n 3.774 0.499 0.640

BASIS

6-31G\*

ground

Atomtypes=3 Charge=1 Nosymmetry Angstrom

6. 16

c -1.614 0.257 -1.386  
c -0.786 0.145 -0.253  
c -1.414 0.036 1.000  
c -2.792 -0.035 1.118  
c -3.626 0.010 -0.027  
c -2.990 0.168 -1.287  
c -5.625 -0.220 1.390  
c 0.664 0.315 -0.375  
c 1.585 -0.555 0.082  
c 3.038 -0.379 -0.116  
c 5.126 0.490 0.666  
c 5.795 -0.017 -0.428  
c 5.074 -0.726 -1.393  
c 3.703 -0.900 -1.227  
c -5.835 0.006 -1.119  
c 3.111 0.876 2.022

1. 19

h -6.878 -0.107 -0.828  
h -5.726 0.972 -1.627  
h -5.595 -0.790 -1.833  
h -6.701 -0.317 1.259  
h -5.267 -1.115 1.911  
h -5.437 0.651 2.030  
h -3.228 -0.108 2.105  
h -0.809 0.015 1.900  
h 1.006 1.153 -0.986  
h 1.277 -1.454 0.612  
h 5.628 1.046 1.444

h 3.117 -1.443 -1.953  
h 5.575 -1.135 -2.261  
h 6.859 0.140 -0.521  
h -3.581 0.232 -2.189  
h -1.166 0.394 -2.364  
h 3.868 1.325 2.661  
h 2.383 1.626 1.720  
h 2.602 0.076 2.559  
7. 2  
n -4.994 -0.077 0.077  
n 3.783 0.312 0.814

BASIS  
6-31G\*  
ground

Atomtypes=3 Charge=1 Nosymmetry Angstrom

6. 16  
c -1.645 -1.183 -0.845  
c -0.791 -0.230 -0.252  
c -1.398 0.881 0.364  
c -2.772 0.991 0.477  
c -3.630 -0.014 -0.042  
c -3.018 -1.104 -0.718  
c -5.606 1.207 0.780  
c 0.648 -0.292 -0.484  
c 1.598 -0.234 0.477  
c 3.026 -0.279 0.174  
c 5.180 0.770 0.256  
c 5.762 -0.269 -0.432  
c 4.959 -1.341 -0.849  
c 3.607 -1.336 -0.542  
c -5.858 -0.960 -0.498  
c 3.262 1.943 1.248  
1. 19  
h -6.896 -0.717 -0.280  
h -5.743 -1.017 -1.586  
h -5.644 -1.947 -0.073  
h -6.683 1.063 0.814  
h -5.240 1.286 1.809  
h -5.404 2.155 0.266  
h -3.188 1.869 0.949  
h -0.775 1.680 0.752  
h 0.963 -0.542 -1.499  
h 1.309 -0.003 1.499  
h 5.742 1.624 0.601  
h 2.970 -2.162 -0.821  
h 5.394 -2.170 -1.391  
h 6.822 -0.243 -0.641  
h -3.627 -1.881 -1.154  
h -1.217 -2.020 -1.388  
h 3.999 2.742 1.268  
h 2.371 2.275 0.717

h 2.997 1.666 2.269  
7. 2  
n -4.994 0.073 0.083  
n 3.843 0.774 0.535

BASIS

6-31G\*

ground

Atomtypes=3 Charge=1 Nosymmetry Angstrom

6. 16

c -1.657 -0.430 1.382  
c -0.810 -0.247 0.266  
c -1.432 -0.072 -0.989  
c -2.803 0.028 -1.113  
c -3.648 -0.054 0.026  
c -3.026 -0.298 1.282  
c -5.631 0.300 -1.390  
c 0.614 -0.504 0.385  
c 1.596 0.327 -0.055  
c 3.007 0.080 0.124  
c 5.263 0.369 -0.657  
c 5.777 -0.323 0.410  
c 4.889 -0.839 1.371  
c 3.531 -0.631 1.224  
c -5.863 -0.046 1.104  
c 3.432 1.276 -2.013

1. 19

h -6.898 0.121 0.813  
h -5.793 -1.042 1.557  
h -5.598 0.701 1.861  
h -6.707 0.402 -1.258  
h -5.256 1.220 -1.853  
h -5.448 -0.535 -2.076  
h -3.231 0.147 -2.098  
h -0.819 -0.030 -1.883  
h 0.891 -1.352 1.011  
h 1.306 1.196 -0.634  
h 5.888 0.792 -1.428  
h 2.841 -0.986 1.975  
h 5.268 -1.379 2.227  
h 6.845 -0.454 0.500  
h -3.627 -0.399 2.173  
h -1.221 -0.643 2.353  
h 4.269 1.418 -2.692  
h 2.663 0.683 -2.506  
h 3.027 2.251 -1.736

7. 2

n -5.008 0.071 -0.083  
n 3.914 0.555 -0.806

BASIS

6-31G\*

ground

Atomtypes=3 Charge=1 Nosymmetry Angstrom

6. 16

c -1.661 0.220 1.412  
c -0.815 -0.154 0.341  
c -1.443 -0.578 -0.853  
c -2.813 -0.528 -1.011  
c -3.653 -0.052 0.033  
c -3.028 0.311 1.259  
c -5.636 -0.363 -1.391  
c 0.598 -0.360 0.573  
c 1.597 0.142 -0.211  
c 3.002 -0.019 0.038  
c 5.273 0.428 -0.634  
c 5.785 -0.247 0.443  
c 4.888 -0.837 1.354  
c 3.532 -0.724 1.145  
c -5.863 0.478 0.982  
c 3.463 1.294 -2.032

1. 19

h -6.899 0.487 0.650  
h -5.788 -0.192 1.846  
h -5.600 1.492 1.302  
h -6.706 -0.174 -1.332  
h -5.234 0.218 -2.228  
h -5.489 -1.429 -1.602  
h -3.245 -0.884 -1.935  
h -0.835 -0.973 -1.659  
h 0.850 -0.774 1.548  
h 1.299 0.671 -1.104  
h 5.903 0.900 -1.371  
h 2.842 -1.187 1.834  
h 5.262 -1.380 2.211  
h 6.855 -0.319 0.574  
h -3.625 0.649 2.093  
h -1.222 0.476 2.370  
h 4.336 1.639 -2.582  
h 2.870 0.646 -2.679  
h 2.869 2.156 -1.728

7. 2

n -5.010 0.028 -0.124  
n 3.922 0.541 -0.837

BASIS

6-31G\*

ground

Atomtypes=3 Charge=1 Nosymmetry Angstrom

6. 16

c -1.612 0.579 1.230  
c -0.801 -0.123 0.308  
c -1.464 -0.867 -0.695  
c -2.836 -0.838 -0.833



c -3.643 -0.056 0.038  
c -2.981 0.646 1.084  
c -5.671 -0.749 -1.176  
c 0.617 -0.275 0.554  
c 1.601 -0.040 -0.365  
c 3.005 -0.140 -0.069  
c 5.253 0.600 -0.485  
c 5.761 -0.226 0.486  
c 4.873 -1.038 1.214  
c 3.522 -0.995 0.929  
c -5.820 0.781 0.831  
c 3.433 1.606 -1.784

1. 19

h -6.864 0.713 0.532  
h -5.733 0.403 1.856  
h -5.532 1.838 0.824  
h -6.738 -0.543 -1.142  
h -5.297 -0.447 -2.160  
h -5.527 -1.830 -1.064  
h -3.296 -1.440 -1.602  
h -0.880 -1.491 -1.362  
h 0.910 -0.395 1.596  
h 1.307 0.269 -1.359  
h 5.880 1.248 -1.079  
h 2.832 -1.648 1.442  
h 5.247 -1.706 1.977  
h 6.825 -0.246 0.671  
h -3.553 1.230 1.790  
h -1.145 1.104 2.055  
h 4.267 2.228 -2.101  
h 3.042 1.064 -2.646  
h 2.652 2.237 -1.362

7. 2

n -5.004 -0.002 -0.103  
n 3.912 0.654 -0.750

BASIS

6-31G\*

ground

Atomtypes=3 Charge=1 Nosymmetry Angstrom

6. 16

c -1.537 0.793 1.000  
c -0.778 -0.149 0.273  
c -1.487 -1.087 -0.505  
c -2.863 -1.038 -0.626  
c -3.621 -0.040 0.042  
c -2.909 0.873 0.868  
c -5.703 -0.930 -0.930  
c 0.653 -0.280 0.509  
c 1.603 -0.293 -0.460  
c 3.027 -0.294 -0.164  
c 5.150 0.809 -0.324

c 5.749 -0.126 0.490  
c 4.968 -1.168 1.012  
c 3.624 -1.243 0.682  
c -5.748 1.044 0.649  
c 3.218 1.801 -1.474

1. 19

h -6.802 0.942 0.402  
h -5.637 0.925 1.733  
h -5.431 2.057 0.376  
h -6.761 -0.677 -0.933  
h -5.342 -0.897 -1.963  
h -5.599 -1.955 -0.556  
h -3.360 -1.789 -1.222  
h -0.941 -1.876 -1.011  
h 0.982 -0.216 1.546  
h 1.302 -0.176 -1.497  
h 5.693 1.638 -0.751  
h 3.006 -2.052 1.042  
h 5.415 -1.914 1.653  
h 6.802 -0.042 0.713  
h -3.443 1.633 1.419  
h -1.032 1.489 1.660  
h 3.934 2.614 -1.579  
h 2.976 1.401 -2.460  
h 2.311 2.166 -0.996

7. 2

n -4.984 0.030 -0.086  
n 3.820 0.739 -0.625

BASIS

6-31G\*

ground

Atomtypes=3 Charge=1 Nosymmetry Angstrom

6. 16

c -1.551 1.110 0.614  
c -0.781 -0.017 0.272  
c -1.472 -1.177 -0.119  
c -2.851 -1.195 -0.244  
c -3.624 -0.038 0.032  
c -2.928 1.117 0.477  
c -5.689 -1.246 -0.552  
c 0.667 -0.027 0.499  
c 1.588 -0.346 -0.430  
c 3.041 -0.349 -0.166  
c 5.111 0.851 -0.149  
c 5.796 -0.254 0.311  
c 5.093 -1.440 0.538  
c 3.723 -1.476 0.297  
c -5.770 1.156 0.229  
c 3.079 2.024 -0.889

1. 19

h -6.823 0.959 0.041

h -5.659 1.431 1.285  
h -5.472 2.014 -0.384  
h -6.752 -1.029 -0.643  
h -5.326 -1.576 -1.532  
h -5.569 -2.073 0.158  
h -3.336 -2.113 -0.537  
h -0.915 -2.086 -0.318  
h 1.010 0.345 1.467  
h 1.278 -0.666 -1.422  
h 5.598 1.794 -0.345  
h 3.151 -2.377 0.465  
h 5.608 -2.320 0.899  
h 6.860 -0.185 0.485  
h -3.471 2.015 0.725  
h -1.058 2.006 0.977  
h 3.827 2.793 -1.066  
h 2.562 1.789 -1.818  
h 2.354 2.368 -0.154

7. 2

n -4.991 -0.038 -0.105  
n 3.768 0.801 -0.380

BASIS

6-31G\*

ground

Atomtypes=3 Charge=1 Nosymmetry Angstrom

6. 16

c -1.601 1.297 0.154  
c -0.788 0.145 0.148  
c -1.442 -1.104 0.179  
c -2.819 -1.205 0.113  
c -3.633 -0.046 0.023  
c -2.977 1.214 0.058  
c -5.654 -1.448 -0.097  
c 0.651 0.258 0.354  
c 1.590 -0.334 -0.423  
c 3.028 -0.348 -0.178  
c 5.127 0.777 0.110  
c 5.809 -0.411 0.206  
c 5.095 -1.612 0.076  
c 3.726 -1.568 -0.121  
c -5.824 1.074 -0.100  
c 3.136 2.146 -0.256

1. 19

h -6.871 0.788 -0.182  
h -5.703 1.668 0.814  
h -5.576 1.705 -0.960  
h -6.723 -1.307 -0.243  
h -5.276 -2.061 -0.921  
h -5.507 -1.997 0.841  
h -3.272 -2.185 0.155  
h -0.852 -2.010 0.271

h 0.968 0.977 1.111  
h 1.260 -1.058 -1.164  
h 5.619 1.736 0.182  
h 3.152 -2.478 -0.214  
h 5.608 -2.563 0.137  
h 6.878 -0.402 0.367  
h -3.553 2.126 0.020  
h -1.139 2.277 0.203  
h 3.882 2.844 -0.631  
h 2.318 2.062 -0.969  
h 2.750 2.500 0.701  
7. 2  
n -4.998 -0.137 -0.069  
n 3.774 0.812 -0.097

## 5. CARTESIAN COORDINATES OF DASPMI IN S0 STATE ( $\xi_1$ - $\xi_2$ grid)

The cartesian coordinates are collected following the order:  
i-0, i-30, i-60, i-90, i-120, i-150, i-180, i-210, i-240, i-270, i-300  
with i=0, 30, 60, 90

The Dalton format has been used (the atoms are separately reported according to their atomic number.)

BASIS  
6-31G\*

Atomtypes=3 Charge=1 Nosymmetry Angstrom  
6. 16

c -1.712 1.427 -0.005  
c -0.818 0.335 -0.003  
c -1.388 -0.958 -0.002  
c -2.747 -1.148 -0.002  
c -3.641 -0.045 -0.001  
c -3.074 1.256 -0.006  
c -5.560 -1.572 -0.018  
c 0.615 0.602 -0.002  
c 1.569 -0.369 -0.001  
c 3.013 -0.361 0.001

c 5.188 0.661 0.002  
c 5.815 -0.549 0.007  
c 5.041 -1.723 0.009  
c 3.666 -1.598 0.005  
c -5.897 0.919 0.026  
c 3.264 2.143 -0.010

1. 19

h -6.921 0.562 0.079  
h -5.709 1.550 0.900  
h -5.791 1.528 -0.876  
h -6.644 -1.501 -0.031  
h -5.242 -2.123 -0.909  
h -5.263 -2.141 0.868  
h -3.133 -2.156 0.000  
h -0.752 -1.833 -0.000  
h 0.866 1.649 -0.002  
h 1.205 -1.390 0.001  
h 5.738 1.589 -0.002  
h 3.048 -2.485 0.007  
h 5.508 -2.697 0.013  
h 6.894 -0.585 0.010  
h -3.712 2.127 -0.012  
h -1.310 2.433 -0.010  
h 4.086 2.854 -0.021  
h 2.660 2.307 -0.903  
h 2.666 2.323 0.884

7. 2

n -4.991 -0.227 0.002  
n 3.820 0.785 -0.001

BASIS

6-31G\*

Atomtypes=3 Charge=1 Nosymmetry Angstrom

6. 16

c -1.630 1.296 -0.479  
c -0.787 0.232 -0.094  
c -1.410 -0.958 0.344  
c -2.776 -1.086 0.378  
c -3.620 -0.017 -0.024  
c -2.998 1.186 -0.453  
c -5.601 -1.393 0.419  
c 0.657 0.406 -0.180  
c 1.574 -0.537 0.145  
c 3.025 -0.452 0.084  
c 5.074 0.793 0.004  
c 5.780 -0.317 -0.357  
c 5.123 -1.557 -0.456  
c 3.753 -1.588 -0.235  
c -5.833 0.983 -0.370  
c 3.111 1.948 0.851

1. 19

h -6.872 0.700 -0.231

h -5.632 1.859 0.252  
h -5.690 1.258 -1.419  
h -6.679 -1.303 0.322  
h -5.268 -2.223 -0.211  
h -5.367 -1.629 1.462  
h -3.205 -2.013 0.723  
h -0.809 -1.796 0.668  
h 0.981 1.373 -0.541  
h 1.222 -1.525 0.425  
h 5.544 1.757 0.134  
h 3.211 -2.519 -0.338  
h 5.668 -2.457 -0.701  
h 6.841 -0.230 -0.541  
h -3.598 2.023 -0.773  
h -1.183 2.222 -0.817  
h 3.857 2.460 1.455  
h 2.749 2.636 0.081  
h 2.284 1.664 1.496

7. 2

n -4.975 -0.138 0.006  
n 3.721 0.752 0.255

BASIS

6-31G\*

Atomtypes=3 Charge=1 Nosymmetry Angstrom

6. 16

c -1.572 1.005 -0.921  
c -0.766 0.074 -0.226  
c -1.426 -0.874 0.595  
c -2.788 -0.913 0.690  
c -3.598 0.012 -0.033  
c -2.936 0.980 -0.843  
c -5.618 -1.034 0.879  
c 0.672 0.136 -0.383  
c 1.571 -0.669 0.208  
c 3.044 -0.508 0.067  
c 5.014 0.859 0.263  
c 5.742 -0.059 -0.427  
c 5.141 -1.237 -0.910  
c 3.775 -1.415 -0.647  
c -5.773 0.942 -0.675  
c 3.015 1.563 1.482

1. 19

h -6.818 0.748 -0.457  
h -5.541 1.964 -0.366  
h -5.621 0.850 -1.753  
h -6.692 -0.913 0.780  
h -5.354 -2.041 0.552  
h -5.352 -0.917 1.931  
h -3.249 -1.651 1.327  
h -0.847 -1.587 1.162  
h 1.037 0.910 -1.050

h 1.232 -1.432 0.905  
h 5.446 1.757 0.675  
h 3.273 -2.303 -1.007  
h 5.712 -1.988 -1.430  
h 6.794 0.128 -0.586  
h -3.510 1.699 -1.406  
h -1.091 1.745 -1.547  
h 3.499 2.539 1.451  
h 1.960 1.692 1.255  
h 3.109 1.161 2.496  
7. 2  
n -4.944 -0.025 0.053  
n 3.648 0.695 0.494

BASIS  
6-31G\*

Atomtypes=3 Charge=1 Nosymmetry Angstrom

6. 16  
c -1.609 0.793 -1.158  
c -0.779 0.062 -0.269  
c -1.420 -0.702 0.742  
c -2.777 -0.738 0.859  
c -3.609 -0.003 -0.043  
c -2.969 0.771 -1.060  
c -5.601 -0.812 1.130  
c 0.647 0.130 -0.435  
c 1.572 -0.500 0.317  
c 3.024 -0.405 0.041  
c 5.100 0.779 0.335  
c 5.715 -0.054 -0.539  
c 5.004 -1.118 -1.151  
c 3.650 -1.248 -0.838  
c -5.803 0.696 -0.879  
c 3.218 1.339 1.821  
1. 19  
h -6.841 0.457 -0.674  
h -5.664 1.773 -0.768  
h -5.581 0.406 -1.907  
h -6.677 -0.692 1.045  
h -5.364 -1.874 1.038  
h -5.290 -0.455 2.112  
h -3.223 -1.333 1.639  
h -0.825 -1.276 1.437  
h 1.000 0.739 -1.261  
h 1.255 -1.113 1.157  
h 5.606 1.598 0.821  
h 3.063 -2.027 -1.306  
h 5.487 -1.792 -1.838  
h 6.758 0.109 -0.766  
h -3.560 1.347 -1.753  
h -1.144 1.385 -1.933  
h 3.826 2.224 2.006

h 2.196 1.670 1.641  
h 3.239 0.716 2.722  
7. 2  
n -4.948 -0.040 0.064  
n 3.746 0.637 0.661

BASIS

6-31G\*

Atomtypes=3 Charge=1 Nosymmetry Angstrom

6. 16

c -1.676 0.704 -1.256  
c -0.810 0.127 -0.298  
c -1.407 -0.558 0.789  
c -2.763 -0.639 0.927  
c -3.633 -0.042 -0.036  
c -3.035 0.634 -1.140  
c -5.582 -0.794 1.245  
c 0.619 0.266 -0.471  
c 1.570 -0.217 0.345  
c 3.009 -0.214 -0.013  
c 5.255 0.459 0.521  
c 5.740 -0.309 -0.490  
c 4.875 -1.080 -1.292  
c 3.500 -1.010 -1.010  
c -5.861 0.461 -0.921  
c 3.405 1.473 1.779

1. 19

h -6.891 0.243 -0.656  
h -5.737 1.545 -0.968  
h -5.661 0.034 -1.905  
h -6.661 -0.695 1.182  
h -5.331 -1.856 1.255  
h -5.248 -0.337 2.178  
h -3.176 -1.173 1.768  
h -0.783 -1.036 1.530  
h 0.937 0.789 -1.366  
h 1.290 -0.769 1.241  
h 5.883 1.078 1.143  
h 2.799 -1.587 -1.597  
h 5.246 -1.676 -2.109  
h 6.806 -0.312 -0.673  
h -3.654 1.102 -1.888  
h -1.244 1.227 -2.100  
h 4.174 1.646 2.530  
h 3.158 2.429 1.305  
h 2.518 1.096 2.287

7. 2

n -4.972 -0.123 0.090  
n 3.893 0.493 0.818

BASIS

6-31G\*



Atomtypes=3 Charge=1 Nosymmetry Angstrom

6. 16

c -1.711 0.207 -1.491  
c -0.821 0.040 -0.409  
c -1.387 -0.190 0.865  
c -2.745 -0.223 1.053  
c -3.638 -0.040 -0.037  
c -3.071 0.173 -1.323  
c -5.558 -0.285 1.471  
c 0.612 0.124 -0.651  
c 1.578 -0.001 0.287  
c 3.000 -0.101 -0.021  
c 5.272 0.306 0.641  
c 5.743 -0.279 -0.498  
c 4.840 -0.812 -1.436  
c 3.478 -0.709 -1.168  
c -5.895 0.092 -0.991  
c 3.477 1.061 2.131

1. 19

h -6.920 0.031 -0.637  
h -5.755 1.065 -1.470  
h -5.742 -0.693 -1.737  
h -6.641 -0.243 1.403  
h -5.274 -1.262 1.871  
h -5.226 0.490 2.168  
h -3.132 -0.401 2.045  
h -0.745 -0.354 1.720  
h 0.902 0.281 -1.684  
h 1.298 -0.090 1.330  
h 5.927 0.732 1.385  
h 2.758 -1.129 -1.855  
h 5.191 -1.295 -2.335  
h 6.809 -0.325 -0.664  
h -3.710 0.316 -2.180  
h -1.306 0.376 -2.480  
h 4.334 1.527 2.613  
h 2.745 1.836 1.900  
h 3.038 0.345 2.831

7. 2

n -4.986 -0.073 0.143  
n 3.926 0.395 0.907

BASIS

6-31G\*

Atomtypes=3 Charge=1 Nosymmetry Angstrom

6. 16

c -1.745 -1.552 0.059  
c -0.825 -0.479 0.018  
c -1.367 0.828 -0.031  
c -2.722 1.048 -0.040  
c -3.639 -0.034 0.002  
c -3.101 -1.349 0.051

c -5.523 1.534 -0.049  
c 0.594 -0.766 0.029  
c 1.584 0.176 -0.008  
c 2.997 -0.084 0.002  
c 5.245 0.773 -0.029  
c 5.775 -0.482 0.020  
c 4.907 -1.592 0.063  
c 3.546 -1.371 0.053  
c -5.917 -0.948 0.026  
c 3.407 2.376 -0.094

1. 19

h -6.934 -0.570 -0.001  
h -5.773 -1.606 -0.836  
h -5.794 -1.538 0.940  
h -6.609 1.487 -0.038  
h -5.195 2.116 0.817  
h -5.211 2.056 -0.959  
h -3.086 2.063 -0.079  
h -0.709 1.686 -0.065  
h 0.849 -1.818 0.068  
h 1.284 1.212 -0.048  
h 5.865 1.655 -0.063  
h 2.871 -2.212 0.085  
h 5.300 -2.596 0.102  
h 6.847 -0.608 0.027  
h -3.759 -2.202 0.086  
h -1.364 -2.564 0.099  
h 4.261 3.049 -0.121  
h 2.808 2.539 -0.992  
h 2.809 2.610 0.790

7. 2

n -4.985 0.177 -0.007  
n 3.896 0.995 -0.039

BASIS

6-31G\*

Atomtypes=3 Charge=1 Nosymmetry Angstrom

6. 16

c -1.711 0.215 1.489  
c -0.821 0.043 0.409  
c -1.387 -0.194 -0.865  
c -2.745 -0.228 -1.053  
c -3.638 -0.038 0.035  
c -3.071 0.181 1.321  
c -5.559 -0.288 -1.471  
c 0.611 0.128 0.651  
c 1.580 -0.001 -0.286  
c 3.000 -0.101 0.023  
c 5.272 0.302 -0.642  
c 5.743 -0.276 0.502  
c 4.839 -0.807 1.441  
c 3.478 -0.703 1.172

c -5.895 0.089 0.991  
c 3.477 1.049 -2.136  
1. 19  
h -6.919 0.009 0.640  
h -5.727 -0.687 1.743  
h -5.767 1.068 1.461  
h -6.641 -0.242 -1.403  
h -5.225 0.483 -2.171  
h -5.279 -1.268 -1.868  
h -3.131 -0.412 -2.043  
h -0.745 -0.360 -1.718  
h 0.902 0.291 1.683  
h 1.299 -0.097 -1.329  
h 5.929 0.726 -1.387  
h 2.757 -1.121 1.861  
h 5.192 -1.285 2.342  
h 6.809 -0.321 0.667  
h -3.710 0.330 2.177  
h -1.306 0.391 2.478  
h 4.332 1.518 -2.617  
h 3.045 0.327 -2.835  
h 2.740 1.819 -1.911  
7. 2  
n -4.986 -0.074 -0.143  
n 3.926 0.392 -0.907

BASIS

6-31G\*

Atomtypes=3 Charge=1 Nosymmetry Angstrom

6. 16  
c -1.673 0.700 1.258  
c -0.809 0.125 0.296  
c -1.407 -0.557 -0.791  
c -2.764 -0.637 -0.928  
c -3.632 -0.044 0.037  
c -3.033 0.628 1.143  
c -5.583 -0.788 -1.245  
c 0.620 0.264 0.469  
c 1.570 -0.216 -0.351  
c 3.008 -0.220 0.008  
c 5.254 0.469 -0.511  
c 5.737 -0.297 0.505  
c 4.870 -1.076 1.297  
c 3.497 -1.011 1.008  
c -5.859 0.463 0.923  
c 3.408 1.461 -1.793  
1. 19  
h -6.889 0.242 0.661  
h -5.656 0.039 1.908  
h -5.737 1.548 0.966  
h -6.662 -0.702 -1.173  
h -5.261 -0.318 -2.177

h -5.321 -1.848 -1.268  
h -3.177 -1.168 -1.770  
h -0.784 -1.033 -1.534  
h 0.940 0.780 1.367  
h 1.288 -0.758 -1.252  
h 5.881 1.096 -1.124  
h 2.794 -1.590 1.592  
h 5.240 -1.672 2.115  
h 6.800 -0.291 0.697  
h -3.652 1.094 1.893  
h -1.240 1.218 2.103  
h 4.183 1.635 -2.538  
h 2.529 1.073 -2.308  
h 3.148 2.418 -1.329  
7. 2  
n -4.972 -0.122 -0.089  
n 3.894 0.492 -0.820

BASIS

6-31G\*

Atomtypes=3 Charge=1 Nosymmetry Angstrom

6. 16

c -1.610 0.826 1.131  
c -0.776 0.068 0.269  
c -1.415 -0.727 -0.721  
c -2.771 -0.766 -0.841  
c -3.606 -0.001 0.034  
c -2.969 0.801 1.029  
c -5.596 -0.862 -1.106  
c 0.649 0.137 0.440  
c 1.574 -0.521 -0.288  
c 3.026 -0.415 -0.023  
c 5.114 0.728 -0.406  
c 5.738 -0.092 0.473  
c 5.026 -1.119 1.146  
c 3.663 -1.240 0.866  
c -5.799 0.741 0.831  
c 3.124 1.450 -1.683

1. 19

h -6.838 0.551 0.588  
h -5.627 0.450 1.869  
h -5.606 1.810 0.719  
h -6.671 -0.741 -1.028  
h -5.284 -0.550 -2.104  
h -5.355 -1.918 -0.966  
h -3.215 -1.385 -1.604  
h -0.818 -1.321 -1.397  
h 0.999 0.772 1.246  
h 1.254 -1.161 -1.108  
h 5.622 1.515 -0.937  
h 3.079 -2.005 1.361  
h 5.515 -1.777 1.842

h 6.794 0.051 0.655  
h -3.562 1.393 1.707  
h -1.147 1.438 1.893  
h 3.882 2.095 -2.123  
h 2.680 0.862 -2.491  
h 2.352 2.088 -1.244  
7. 2  
n -4.943 -0.039 -0.075  
n 3.750 0.599 -0.687

BASIS  
6-31G\*

Atomtypes=3 Charge=1 Nosymmetry Angstrom

6. 16  
c -1.572 1.001 0.924  
c -0.766 0.074 0.224  
c -1.425 -0.869 -0.600  
c -2.787 -0.909 -0.695  
c -3.599 0.013 0.032  
c -2.937 0.977 0.846  
c -5.620 -1.056 -0.851  
c 0.671 0.136 0.381  
c 1.571 -0.666 -0.214  
c 3.044 -0.506 -0.071  
c 5.016 0.860 -0.255  
c 5.742 -0.064 0.430  
c 5.139 -1.244 0.906  
c 3.773 -1.419 0.640  
c -5.775 0.959 0.648  
c 3.019 1.574 -1.471  
1. 19  
h -6.814 0.804 0.376  
h -5.680 0.849 1.731  
h -5.494 1.974 0.365  
h -6.692 -0.971 -0.705  
h -5.403 -0.928 -1.915  
h -5.307 -2.054 -0.540  
h -3.249 -1.641 -1.338  
h -0.847 -1.579 -1.173  
h 1.037 0.906 1.053  
h 1.234 -1.424 -0.917  
h 5.450 1.758 -0.662  
h 3.270 -2.309 0.993  
h 5.709 -1.999 1.422  
h 6.795 0.121 0.593  
h -3.511 1.690 1.416  
h -1.092 1.738 1.554  
h 3.502 2.549 -1.433  
h 3.112 1.179 -2.488  
h 1.964 1.704 -1.244  
7. 2  
n -4.944 -0.027 -0.053

n 3.650 0.698 -0.488

BASIS

6-31G\*

Atomtypes=3 Charge=1 Nosymmetry Angstrom

6. 16

c -1.719 1.431 -0.271

c -0.824 0.422 0.130

c -1.367 -0.829 0.479

c -2.719 -1.072 0.408

c -3.620 -0.053 0.004

c -3.075 1.214 -0.327

c -5.512 -1.591 0.285

c 0.623 0.692 0.151

c 1.537 -0.279 -0.084

c 2.984 -0.327 -0.101

c 5.196 0.581 0.139

c 5.775 -0.621 -0.132

c 4.956 -1.735 -0.401

c 3.588 -1.556 -0.378

c -5.879 0.775 -0.479

c 3.325 2.102 0.447

1. 19

h -6.898 0.402 -0.436

h -5.803 1.643 0.184

h -5.674 1.098 -1.504

h -6.589 -1.569 0.157

h -5.105 -2.375 -0.361

h -5.292 -1.846 1.325

h -3.091 -2.048 0.677

h -0.712 -1.614 0.831

h 0.893 1.716 0.351

h 1.127 -1.257 -0.318

h 5.780 1.461 0.353

h 2.936 -2.395 -0.580

h 5.386 -2.699 -0.623

h 6.851 -0.701 -0.134

h -3.724 2.022 -0.629

h -1.329 2.403 -0.545

h 4.172 2.774 0.572

h 2.719 2.472 -0.382

h 2.741 2.108 1.367

7. 2

n -4.962 -0.284 -0.066

n 3.832 0.757 0.157

BASIS

6-31G\*

Atomtypes=3 Charge=1 Nosymmetry Angstrom

6. 16

c -1.662 1.252 -0.706

c -0.799 0.372 -0.025

c -1.382 -0.693 0.689  
c -2.741 -0.899 0.691  
c -3.608 -0.022 -0.012  
c -3.023 1.071 -0.705  
c -5.549 -1.347 0.698  
c 0.654 0.578 -0.082  
c 1.541 -0.437 -0.007  
c 2.995 -0.413 -0.059  
c 5.123 0.660 0.216  
c 5.774 -0.391 -0.356  
c 5.042 -1.523 -0.763  
c 3.667 -1.503 -0.598  
c -5.841 0.703 -0.729  
c 3.176 1.780 1.158

1. 19

h -6.870 0.377 -0.606  
h -5.754 1.720 -0.332  
h -5.611 0.723 -1.797  
h -6.623 -1.343 0.545  
h -5.151 -2.295 0.328  
h -5.353 -1.280 1.773  
h -3.144 -1.732 1.245  
h -0.750 -1.356 1.265  
h 0.980 1.599 -0.230  
h 1.137 -1.445 0.027  
h 5.647 1.534 0.576  
h 3.071 -2.348 -0.916  
h 5.537 -2.381 -1.192  
h 6.847 -0.347 -0.473  
h -3.646 1.769 -1.242  
h -1.241 2.085 -1.253  
h 3.956 2.231 1.766  
h 2.761 2.547 0.500  
h 2.393 1.413 1.817

7. 2

n -4.957 -0.216 -0.016  
n 3.758 0.672 0.393

BASIS

6-31G\*

Atomtypes=3 Charge=1 Nosymmetry Angstrom

6. 16

c -1.627 0.941 -1.088  
c -0.777 0.241 -0.205  
c -1.378 -0.532 0.812  
c -2.739 -0.659 0.904  
c -3.595 0.010 -0.017  
c -2.989 0.828 -1.014  
c -5.559 -0.982 1.068  
c 0.669 0.367 -0.343  
c 1.542 -0.582 0.017  
c 3.020 -0.467 -0.086

c 5.071 0.651 0.484  
c 5.772 -0.167 -0.344  
c 5.116 -1.171 -1.085  
c 3.730 -1.287 -0.922  
c -5.818 0.632 -0.846  
c 3.012 1.372 1.615

1. 19

h -6.852 0.428 -0.588  
h -5.646 1.707 -0.758  
h -5.653 0.328 -1.883  
h -6.629 -1.024 0.888  
h -5.160 -1.994 1.001  
h -5.390 -0.595 2.076  
h -3.159 -1.254 1.699  
h -0.754 -1.022 1.544  
h 1.028 1.262 -0.840  
h 1.160 -1.498 0.465  
h 5.543 1.411 1.088  
h 3.188 -2.053 -1.461  
h 5.661 -1.840 -1.730  
h 6.843 -0.041 -0.413  
h -3.602 1.358 -1.725  
h -1.189 1.564 -1.855  
h 3.720 2.098 2.010  
h 2.174 1.916 1.177  
h 2.639 0.768 2.446

7. 2

n -4.940 -0.113 0.062  
n 3.689 0.557 0.615

BASIS

6-31G\*

Atomtypes=3 Charge=1 Nosymmetry Angstrom

6. 16

c -1.630 0.660 -1.275  
c -0.784 0.193 -0.239  
c -1.398 -0.332 0.926  
c -2.754 -0.430 1.035  
c -3.603 0.002 -0.030  
c -2.988 0.561 -1.192  
c -5.571 -0.673 1.263  
c 0.649 0.321 -0.379  
c 1.552 -0.484 0.205  
c 3.008 -0.388 -0.053  
c 5.148 0.557 0.521  
c 5.739 -0.131 -0.485  
c 4.979 -0.985 -1.326  
c 3.609 -1.081 -1.070  
c -5.811 0.340 -1.034  
c 3.181 1.185 1.881

1. 19

h -6.844 0.145 -0.767



h -5.693 1.411 -1.210  
h -5.582 -0.203 -1.952  
h -6.648 -0.665 1.134  
h -5.248 -1.705 1.417  
h -5.323 -0.081 2.145  
h -3.183 -0.827 1.940  
h -0.780 -0.647 1.754  
h 0.997 1.042 -1.110  
h 1.208 -1.251 0.896  
h 5.693 1.212 1.183  
h 2.992 -1.723 -1.685  
h 5.441 -1.538 -2.126  
h 6.803 -0.020 -0.634  
h -3.595 0.911 -2.010  
h -1.182 1.094 -2.158  
h 3.954 1.767 2.379  
h 2.406 1.877 1.543  
h 2.750 0.505 2.622

7. 2

n -4.940 -0.106 0.062  
n 3.776 0.464 0.771

BASIS

6-31G\*

Atomtypes=3 Charge=1 Nosymmetry Angstrom

6. 16

c -1.656 0.393 -1.391  
c -0.810 0.226 -0.273  
c -1.416 -0.059 0.972  
c -2.772 -0.184 1.096  
c -3.623 -0.032 -0.038  
c -3.014 0.267 -1.292  
c -5.587 -0.453 1.369  
c 0.625 0.391 -0.430  
c 1.557 -0.219 0.320  
c 2.996 -0.224 -0.032  
c 5.257 0.350 0.558  
c 5.719 -0.263 -0.565  
c 4.834 -0.903 -1.456  
c 3.464 -0.858 -1.147  
c -5.833 -0.025 -1.099  
c 3.442 1.143 2.010

1. 19

h -6.862 -0.196 -0.800  
h -5.756 0.978 -1.523  
h -5.571 -0.759 -1.865  
h -6.664 -0.489 1.244  
h -5.251 -1.419 1.755  
h -5.350 0.325 2.096  
h -3.195 -0.394 2.065  
h -0.796 -0.164 1.852  
h 0.950 0.965 -1.290

h 1.245 -0.864 1.140  
h 5.899 0.868 1.251  
h 2.747 -1.328 -1.806  
h 5.188 -1.383 -2.352  
h 6.781 -0.244 -0.765  
h -3.623 0.401 -2.171  
h -1.215 0.626 -2.350  
h 4.236 1.193 2.754  
h 3.176 2.163 1.714  
h 2.574 0.678 2.478  
7. 2  
n -4.962 -0.164 0.073  
n 3.899 0.345 0.882

BASIS  
6-31G\*

Atomtypes=3 Charge=1 Nosymmetry Angstrom

6. 16  
c -1.697 -0.758 -1.309  
c -0.823 -0.038 -0.473  
c -1.392 0.686 0.593  
c -2.748 0.694 0.817  
c -3.627 -0.029 -0.031  
c -3.056 -0.753 -1.111  
c -5.554 0.724 1.292  
c 0.620 -0.064 -0.731  
c 1.563 0.057 0.226  
c 2.992 -0.131 0.004  
c 5.251 0.448 0.585  
c 5.748 -0.398 -0.360  
c 4.863 -1.157 -1.153  
c 3.499 -0.999 -0.948  
c -5.866 -0.791 -0.690  
c 3.422 1.520 1.818  
1. 19  
h -6.890 -0.655 -0.357  
h -5.792 -0.446 -1.724  
h -5.632 -1.858 -0.657  
h -6.633 0.601 1.278  
h -5.177 0.362 2.253  
h -5.328 1.791 1.204  
h -3.139 1.262 1.646  
h -0.752 1.269 1.242  
h 0.919 -0.238 -1.759  
h 1.248 0.243 1.247  
h 5.889 1.054 1.210  
h 2.795 -1.582 -1.526  
h 5.236 -1.849 -1.892  
h 6.817 -0.476 -0.489  
h -3.688 -1.307 -1.788  
h -1.287 -1.324 -2.136  
h 4.269 2.082 2.205

h 2.706 2.224 1.391  
h 2.955 0.988 2.650  
7. 2  
n -4.972 -0.029 0.183  
n 3.898 0.588 0.795

BASIS  
6-31G\*

Atomtypes=3 Charge=1 Nosymmetry Angstrom

6. 16  
c -1.741 -0.029 1.560  
c -0.829 -0.238 0.506  
c -1.356 -0.351 -0.797  
c -2.704 -0.234 -1.041  
c -3.619 -0.023 0.022  
c -3.092 0.068 1.337  
c -5.488 0.002 -1.569  
c 0.606 -0.327 0.784  
c 1.562 0.058 -0.102  
c 2.987 -0.024 0.092  
c 5.204 0.318 -0.779  
c 5.776 -0.202 0.343  
c 4.946 -0.660 1.387  
c 3.580 -0.563 1.239  
c -5.894 0.284 0.896  
c 3.310 1.003 -2.157

1. 19  
h -6.906 0.310 0.506  
h -5.826 -0.534 1.619  
h -5.699 1.226 1.415  
h -6.563 0.149 -1.543  
h -5.051 0.773 -2.210  
h -5.285 -0.978 -2.012  
h -3.062 -0.320 -2.055  
h -0.689 -0.556 -1.623  
h 0.874 -0.695 1.768  
h 1.220 0.466 -1.042  
h 5.793 0.678 -1.609  
h 2.932 -0.914 2.028  
h 5.374 -1.080 2.285  
h 6.852 -0.258 0.414  
h -3.753 0.220 2.177  
h -1.364 0.059 2.571  
h 4.139 1.307 -2.791  
h 2.707 0.274 -2.702  
h 2.703 1.883 -1.935  
7. 2  
n -4.959 0.087 -0.210  
n 3.846 0.419 -0.925

BASIS  
6-31G\*

Atomtypes=3 Charge=1 Nosymmetry Angstrom

6. 16

c -1.720 0.557 1.416  
c -0.822 -0.043 0.511  
c -1.365 -0.673 -0.626  
c -2.716 -0.666 -0.876  
c -3.617 -0.046 0.027  
c -3.074 0.561 1.192  
c -5.508 -0.662 -1.410  
c 0.621 0.003 0.767  
c 1.552 0.015 -0.203  
c 2.989 -0.097 0.034  
c 5.230 0.396 -0.679  
c 5.750 -0.339 0.344  
c 4.889 -0.996 1.245  
c 3.518 -0.858 1.060  
c -5.880 0.582 0.743  
c 3.366 1.373 -1.940

1. 19

h -6.896 0.475 0.375  
h -5.817 0.101 1.722  
h -5.666 1.648 0.860  
h -6.583 -0.516 -1.428  
h -5.083 -0.214 -2.313  
h -5.305 -1.738 -1.422  
h -3.088 -1.155 -1.764  
h -0.705 -1.191 -1.310  
h 0.926 0.052 1.807  
h 1.225 0.060 -1.238  
h 5.849 0.915 -1.394  
h 2.828 -1.372 1.714  
h 5.283 -1.596 2.052  
h 6.823 -0.412 0.445  
h -3.724 1.035 1.911  
h -1.329 1.033 2.306  
h 4.197 1.929 -2.370  
h 2.908 0.774 -2.730  
h 2.633 2.087 -1.560

7. 2

n -4.958 -0.038 -0.208  
n 3.870 0.530 -0.857

BASIS

6-31G\*

Atomtypes=3 Charge=1 Nosymmetry Angstrom

6. 16

c -1.670 0.906 1.123  
c -0.807 0.055 0.396  
c -1.396 -0.884 -0.482  
c -2.750 -0.931 -0.675  
c -3.616 -0.045 0.031  
c -3.025 0.874 0.947

c -5.553 -0.973 -1.156  
c 0.631 0.132 0.604  
c 1.550 -0.185 -0.313  
c 3.002 -0.226 -0.017  
c 5.222 0.558 -0.510  
c 5.748 -0.351 0.353  
c 4.918 -1.248 1.056  
c 3.534 -1.155 0.832  
c -5.857 0.748 0.647  
c 3.317 1.735 -1.525

1. 19

h -6.880 0.429 0.471  
h -5.643 0.638 1.711  
h -5.768 1.801 0.368  
h -6.606 -0.730 -1.259  
h -5.074 -0.838 -2.126  
h -5.465 -2.019 -0.853  
h -3.161 -1.670 -1.343  
h -0.765 -1.594 -0.996  
h 0.964 0.518 1.563  
h 1.229 -0.533 -1.295  
h 5.822 1.270 -1.054  
h 2.858 -1.827 1.342  
h 5.324 -1.961 1.753  
h 6.820 -0.371 0.492  
h -3.644 1.562 1.499  
h -1.241 1.610 1.822  
h 4.072 2.060 -2.239  
h 2.437 1.422 -2.086  
h 3.046 2.589 -0.895

7. 2

n -4.953 -0.085 -0.155  
n 3.847 0.627 -0.744

BASIS

6-31G\*

Atomtypes=3 Charge=1 Nosymmetry Angstrom

6. 16

c -1.589 0.994 0.951  
c -0.776 0.011 0.333  
c -1.426 -1.010 -0.406  
c -2.781 -1.029 -0.556  
c -3.596 -0.013 0.033  
c -2.945 1.001 0.801  
c -5.601 -1.063 -0.907  
c 0.653 0.030 0.541  
c 1.560 -0.473 -0.316  
c 3.021 -0.402 -0.083  
c 5.094 0.805 -0.323  
c 5.749 -0.159 0.365  
c 5.062 -1.296 0.861  
c 3.689 -1.372 0.613

c -5.770 1.018 0.501  
c 3.056 1.746 -1.361  
1. 19  
h -6.808 0.832 0.244  
h -5.672 0.992 1.587  
h -5.495 2.008 0.135  
h -6.668 -0.862 -0.929  
h -5.230 -1.072 -1.932  
h -5.443 -2.045 -0.457  
h -3.238 -1.830 -1.113  
h -0.836 -1.804 -0.839  
h 1.010 0.571 1.411  
h 1.211 -0.953 -1.228  
h 5.582 1.680 -0.719  
h 3.124 -2.219 0.979  
h 5.577 -2.069 1.408  
h 6.811 -0.046 0.531  
h -3.525 1.776 1.275  
h -1.115 1.763 1.546  
h 3.801 2.454 -1.719  
h 2.557 1.319 -2.234  
h 2.321 2.299 -0.770  
7. 2  
n -4.932 -0.017 -0.121  
n 3.720 0.721 -0.575

BASIS

6-31G\*

Atomtypes=3 Charge=1 Nosymmetry Angstrom

6. 16  
c -1.548 1.128 0.706  
c -0.765 0.028 0.292  
c -1.438 -1.094 -0.242  
c -2.800 -1.118 -0.367  
c -3.589 -0.003 0.042  
c -2.911 1.125 0.590  
c -5.623 -1.190 -0.639  
c 0.679 0.062 0.459  
c 1.555 -0.593 -0.319  
c 3.031 -0.471 -0.184  
c 4.997 0.913 -0.068  
c 5.729 -0.133 0.398  
c 5.135 -1.397 0.594  
c 3.768 -1.515 0.305  
c -5.743 1.131 0.330  
c 3.018 1.827 -1.176  
1. 19  
h -6.788 0.919 0.132  
h -5.626 1.324 1.399  
h -5.459 2.025 -0.228  
h -6.691 -1.000 -0.648  
h -5.296 -1.382 -1.662

h -5.435 -2.076 -0.029  
h -3.275 -1.998 -0.771  
h -0.867 -1.962 -0.538  
h 1.061 0.724 1.231  
h 1.185 -1.193 -1.146  
h 5.420 1.887 -0.255  
h 3.268 -2.460 0.468  
h 5.711 -2.243 0.928  
h 6.778 0.021 0.608  
h -3.471 1.984 0.923  
h -1.055 1.992 1.130  
h 3.484 2.785 -0.948  
h 3.150 1.622 -2.245  
h 1.955 1.899 -0.965  
7. 2  
n -4.933 -0.021 -0.082  
n 3.633 0.794 -0.348

BASIS

6-31G\*

Atomtypes=3 Charge=1 Nosymmetry Angstrom

6. 16

c -1.671 1.311 -0.539  
c -0.826 0.541 0.289  
c -1.391 -0.585 0.921  
c -2.716 -0.905 0.781  
c -3.581 -0.072 0.015  
c -3.012 1.055 -0.645  
c -5.486 -1.513 0.582  
c 0.640 0.783 0.298  
c 1.502 -0.122 -0.246  
c 2.924 -0.221 -0.275  
c 5.161 0.388 0.402  
c 5.690 -0.747 -0.110  
c 4.832 -1.663 -0.778  
c 3.497 -1.386 -0.838  
c -5.784 0.498 -0.901  
c 3.400 2.023 0.752

1. 19

h -6.796 0.109 -0.848  
h -5.786 1.522 -0.522  
h -5.470 0.505 -1.947  
h -6.549 -1.551 0.368  
h -5.027 -2.439 0.230  
h -5.350 -1.435 1.663  
h -3.095 -1.804 1.240  
h -0.749 -1.222 1.513  
h 0.974 1.488 1.047  
h 1.045 -0.922 -0.822  
h 5.765 1.130 0.901  
h 2.822 -2.080 -1.321  
h 5.232 -2.561 -1.224

h 6.748 -0.936 -0.016  
h -3.632 1.704 -1.242  
h -1.243 2.145 -1.080  
h 4.267 2.681 0.750  
h 2.664 2.428 0.060  
h 2.983 2.002 1.760

7. 2

n -4.900 -0.353 -0.099  
n 3.817 0.689 0.313

BASIS

6-31G\*

Atomtypes=3 Charge=1 Nosymmetry Angstrom

6. 16

c -1.641 1.062 -0.947  
c -0.823 0.569 0.089  
c -1.415 -0.279 1.042  
c -2.749 -0.599 0.994  
c -3.588 -0.040 -0.010  
c -2.989 0.809 -0.983  
c -5.518 -1.219 0.942  
c 0.650 0.790 0.052  
c 1.508 -0.237 -0.142  
c 2.944 -0.299 -0.190  
c 5.165 0.449 0.378  
c 5.741 -0.510 -0.386  
c 4.912 -1.453 -1.051  
c 3.553 -1.330 -0.925  
c -5.788 0.278 -1.059  
c 3.283 1.550 1.463

1. 19

h -6.817 0.003 -0.847  
h -5.711 1.366 -1.043  
h -5.529 -0.084 -2.056  
h -6.569 -1.351 0.708  
h -5.034 -2.198 0.918  
h -5.433 -0.805 1.949  
h -3.153 -1.290 1.717  
h -0.793 -0.703 1.818  
h 0.983 1.758 0.403  
h 1.056 -1.177 -0.449  
h 5.747 1.172 0.930  
h 2.899 -2.027 -1.431  
h 5.346 -2.240 -1.647  
h 6.816 -0.555 -0.468  
h -3.587 1.240 -1.770  
h -1.193 1.674 -1.717  
h 4.097 1.882 2.103  
h 2.870 2.423 0.950  
h 2.510 1.105 2.087

7. 2

n -4.915 -0.319 -0.044



n 3.797 0.563 0.520

BASIS

6-31G\*

Atomtypes=3 Charge=1 Nosymmetry Angstrom

6. 16

c -1.615 0.741 -1.201  
c -0.797 0.403 -0.104  
c -1.413 -0.129 1.042  
c -2.767 -0.345 1.094  
c -3.594 -0.002 -0.012  
c -2.972 0.556 -1.166  
c -5.575 -0.769 1.220  
c 0.672 0.586 -0.183  
c 1.521 -0.432 -0.069  
c 2.991 -0.367 -0.187  
c 5.124 0.473 0.552  
c 5.769 -0.261 -0.389  
c 5.040 -1.111 -1.255  
c 3.657 -1.145 -1.108  
c -5.786 0.154 -1.110  
c 3.112 1.169 1.780

1. 19

h -6.818 -0.081 -0.870  
h -5.714 1.222 -1.328  
h -5.498 -0.412 -1.998  
h -6.643 -0.848 1.046  
h -5.182 -1.766 1.431  
h -5.411 -0.129 2.090  
h -3.200 -0.777 1.982  
h -0.799 -0.381 1.895  
h 1.028 1.597 -0.361  
h 1.104 -1.432 0.050  
h 5.644 1.114 1.246  
h 3.063 -1.786 -1.746  
h 5.539 -1.710 -1.998  
h 6.845 -0.193 -0.457  
h -3.565 0.831 -2.023  
h -1.156 1.153 -2.089  
h 3.885 1.647 2.377  
h 2.432 1.941 1.411  
h 2.546 0.494 2.427

7. 2

n -4.934 -0.201 0.030  
n 3.742 0.441 0.690

BASIS

6-31G\*

Atomtypes=3 Charge=1 Nosymmetry Angstrom

6. 16

c -1.599 0.259 -1.371  
c -0.794 0.252 -0.212

c -1.431 0.158 1.043  
c -2.789 0.033 1.144  
c -3.601 0.003 -0.028  
c -2.957 0.125 -1.296  
c -5.607 -0.247 1.362  
c 0.660 0.420 -0.329  
c 1.540 -0.457 0.150  
c 3.000 -0.365 -0.099  
c 5.164 0.453 0.582  
c 5.740 -0.131 -0.496  
c 4.964 -0.860 -1.431  
c 3.587 -0.949 -1.186  
c -5.775 -0.165 -1.150  
c 3.208 0.973 2.002

1. 19

h -6.812 -0.299 -0.863  
h -5.686 0.770 -1.705  
h -5.482 -0.996 -1.795  
h -6.676 -0.337 1.208  
h -5.257 -1.133 1.895  
h -5.417 0.639 1.970  
h -3.243 -0.034 2.120  
h -0.828 0.192 1.939  
h 1.004 1.220 -0.976  
h 1.177 -1.287 0.755  
h 5.723 1.011 1.316  
h 2.955 -1.500 -1.870  
h 5.413 -1.330 -2.289  
h 6.808 -0.032 -0.630  
h -3.540 0.116 -2.203  
h -1.126 0.360 -2.337  
h 3.996 1.471 2.565  
h 2.454 1.719 1.744  
h 2.754 0.225 2.658

7. 2

n -4.940 -0.132 0.058  
n 3.787 0.367 0.817

BASIS

6-31G\*

Atomtypes=3 Charge=1 Nosymmetry Angstrom

6. 16

c -1.612 -1.034 -0.983  
c -0.809 -0.007 -0.447  
c -1.437 0.996 0.313  
c -2.792 0.992 0.523  
c -3.607 -0.032 -0.038  
c -2.970 -1.050 -0.805  
c -5.599 0.992 0.971  
c 0.653 -0.009 -0.662  
c 1.538 -0.074 0.337  
c 2.984 -0.247 0.122

c 5.214 0.639 0.338  
c 5.722 -0.411 -0.356  
c 4.869 -1.432 -0.838  
c 3.501 -1.302 -0.590  
c -5.791 -1.079 -0.446  
c 3.359 1.848 1.418

1. 19

h -6.831 -0.862 -0.229  
h -5.659 -1.102 -1.529  
h -5.546 -2.061 -0.034  
h -6.660 0.774 1.038  
h -5.183 1.003 1.980  
h -5.473 1.977 0.519  
h -3.239 1.780 1.109  
h -0.836 1.790 0.731  
h 0.997 -0.025 -1.690  
h 1.183 -0.032 1.364  
h 5.827 1.443 0.715  
h 2.813 -2.052 -0.950  
h 5.261 -2.280 -1.375  
h 6.786 -0.452 -0.534  
h -3.552 -1.844 -1.244  
h -1.142 -1.820 -1.557  
h 4.133 2.609 1.497  
h 2.480 2.302 0.961  
h 3.104 1.515 2.430

7. 2

n -4.948 -0.040 0.154  
n 3.853 0.751 0.599

BASIS

6-31G\*

Atomtypes=3 Charge=1 Nosymmetry Angstrom

6. 16

c -1.655 -0.127 1.473  
c -0.822 -0.509 0.400  
c -1.402 -0.578 -0.881  
c -2.736 -0.334 -1.084  
c -3.591 -0.037 0.016  
c -3.002 0.061 1.310  
c -5.516 0.070 -1.503  
c 0.641 -0.643 0.593  
c 1.536 0.208 0.026  
c 2.958 0.104 0.169  
c 5.165 0.372 -0.771  
c 5.744 -0.246 0.287  
c 4.921 -0.714 1.348  
c 3.566 -0.536 1.263  
c -5.803 0.462 0.963  
c 3.243 1.218 -2.030

1. 19

h -6.827 0.505 0.610

h -5.732 -0.314 1.726  
h -5.547 1.426 1.409  
h -6.581 0.263 -1.429  
h -5.075 0.809 -2.175  
h -5.372 -0.927 -1.924  
h -3.133 -0.359 -2.087  
h -0.770 -0.818 -1.726  
h 0.988 -1.579 1.018  
h 1.154 1.026 -0.574  
h 5.738 0.752 -1.603  
h 2.924 -0.853 2.071  
h 5.364 -1.182 2.215  
h 6.815 -0.367 0.316  
h -3.612 0.298 2.167  
h -1.215 -0.011 2.453  
h 4.030 1.381 -2.761  
h 2.469 0.594 -2.483  
h 2.809 2.186 -1.766  
7. 2  
n -4.918 0.161 -0.167  
n 3.805 0.553 -0.861  
BASIS  
6-31G\*

Atomtypes=3 Charge=1 Nosymmetry Angstrom

6. 16  
c -1.675 0.451 1.422  
c -0.836 -0.372 0.638  
c -1.398 -0.960 -0.515  
c -2.719 -0.789 -0.842  
c -3.582 -0.039 0.008  
c -3.012 0.581 1.158  
c -5.475 -0.520 -1.477  
c 0.623 -0.415 0.896  
c 1.536 0.132 0.040  
c 2.949 -0.006 0.116  
c 5.135 0.442 -0.815  
c 5.752 -0.311 0.127  
c 4.958 -0.944 1.124  
c 3.605 -0.779 1.101  
c -5.791 0.843 0.614  
c 3.189 1.463 -1.876  
1. 19  
h -6.813 0.739 0.261  
h -5.736 0.452 1.631  
h -5.532 1.904 0.623  
h -6.524 -0.249 -1.545  
h -4.969 -0.162 -2.375  
h -5.397 -1.608 -1.432  
h -3.096 -1.215 -1.758  
h -0.760 -1.544 -1.162  
h 0.940 -1.198 1.577

h 1.148 0.766 -0.747  
h 5.681 0.950 -1.595  
h 2.998 -1.247 1.862  
h 5.427 -1.541 1.891  
h 6.824 -0.418 0.113  
h -3.629 1.174 1.816  
h -1.245 0.961 2.272  
h 3.986 1.877 -2.489  
h 2.520 0.886 -2.517  
h 2.631 2.289 -1.428  
7. 2  
n -4.898 0.094 -0.277  
n 3.772 0.617 -0.840

BASIS  
6-31G\*

Atomtypes=3 Charge=1 Nosymmetry Angstrom

6. 16  
c -1.669 0.821 1.184  
c -0.833 -0.162 0.617  
c -1.411 -1.070 -0.291  
c -2.746 -1.018 -0.608  
c -3.598 -0.064 0.015  
c -3.014 0.858 0.928  
c -5.524 -0.986 -1.197  
c 0.633 -0.138 0.859  
c 1.536 0.103 -0.111  
c 2.960 -0.080 0.018  
c 5.199 0.519 -0.655  
c 5.739 -0.438 0.138  
c 4.882 -1.266 0.913  
c 3.526 -1.065 0.833  
c -5.800 0.953 0.386  
c 3.325 1.828 -1.536  
1. 19  
h -6.821 0.795 0.054  
h -5.768 0.846 1.472  
h -5.502 1.970 0.121  
h -6.586 -0.782 -1.282  
h -5.071 -0.892 -2.186  
h -5.393 -2.009 -0.841  
h -3.140 -1.700 -1.345  
h -0.779 -1.809 -0.761  
h 0.964 -0.553 1.807  
h 1.174 0.497 -1.058  
h 5.801 1.170 -1.270  
h 2.851 -1.705 1.384  
h 5.291 -2.050 1.531  
h 6.810 -0.567 0.163  
h -3.627 1.601 1.414  
h -1.233 1.548 1.856  
h 4.152 2.466 -1.835

h 2.828 1.460 -2.437  
h 2.617 2.424 -0.957  
7. 2  
n -4.924 -0.030 -0.259  
n 3.838 0.732 -0.720

BASIS  
6-31G\*

Atomtypes=3 Charge=1 Nosymmetry Angstrom

6. 16  
c -1.603 0.982 0.918  
c -0.813 -0.089 0.451  
c -1.454 -1.148 -0.217  
c -2.807 -1.136 -0.441  
c -3.606 -0.055 0.027  
c -2.958 1.007 0.722  
c -5.610 -1.098 -0.943  
c 0.651 -0.093 0.673  
c 1.543 -0.134 -0.311  
c 2.996 -0.222 -0.075  
c 5.196 0.704 -0.403  
c 5.754 -0.346 0.253  
c 4.947 -1.379 0.780  
c 3.563 -1.278 0.589  
c -5.781 1.031 0.381  
c 3.259 1.949 -1.277

1. 19  
h -6.826 0.796 0.200  
h -5.627 1.118 1.456  
h -5.553 1.989 -0.093  
h -6.641 -0.811 -1.125  
h -5.117 -1.244 -1.904  
h -5.601 -2.039 -0.387  
h -3.264 -1.962 -0.963  
h -0.863 -1.984 -0.556  
h 0.989 -0.067 1.706  
h 1.197 -0.111 -1.345  
h 5.776 1.509 -0.824  
h 2.907 -2.056 0.952  
h 5.379 -2.217 1.300  
h 6.829 -0.379 0.362  
h -3.529 1.846 1.087  
h -1.124 1.798 1.438  
h 3.981 2.763 -1.263  
h 3.033 1.710 -2.321  
h 2.349 2.294 -0.787  
7. 2  
n -4.945 -0.037 -0.178  
n 3.816 0.807 -0.567

BASIS  
6-31G\*

Atomtypes=3 Charge=1 Nosymmetry Angstrom

6. 16

c -1.529 1.080 0.664  
c -0.782 -0.078 0.350  
c -1.482 -1.222 -0.088  
c -2.842 -1.209 -0.248  
c -3.592 -0.029 0.034  
c -2.885 1.119 0.503  
c -5.660 -1.185 -0.603  
c 0.667 -0.111 0.575  
c 1.553 -0.404 -0.375  
c 3.020 -0.371 -0.159  
c 5.083 0.880 -0.166  
c 5.758 -0.207 0.284  
c 5.089 -1.430 0.526  
c 3.706 -1.463 0.291  
c -5.705 1.212 0.165  
c 3.022 2.001 -0.941

1. 19

h -6.752 1.024 -0.047  
h -5.605 1.486 1.217  
h -5.368 2.042 -0.458  
h -6.718 -0.950 -0.662  
h -5.313 -1.478 -1.595  
h -5.529 -2.020 0.087  
h -3.343 -2.105 -0.577  
h -0.928 -2.126 -0.289  
h 1.015 0.232 1.545  
h 1.188 -0.686 -1.362  
h 5.560 1.826 -0.365  
h 3.153 -2.373 0.472  
h 5.616 -2.300 0.881  
h 6.821 -0.122 0.452  
h -3.420 2.026 0.738  
h -1.011 1.954 1.031  
h 3.760 2.767 -1.175  
h 2.490 1.761 -1.865  
h 2.312 2.422 -0.225

7. 2

n -4.931 -0.001 -0.129  
n 3.704 0.837 -0.408

BASIS

6-31G\*

Atomtypes=3 Charge=1 Nosymmetry Angstrom

6. 16

c -1.532 1.230 0.313  
c -0.778 0.041 0.359  
c -1.461 -1.182 0.227  
c -2.822 -1.229 0.064  
c -3.587 -0.028 0.039  
c -2.894 1.210 0.172

c -5.638 -1.338 -0.284  
c 0.688 0.076 0.528  
c 1.538 -0.424 -0.375  
c 3.009 -0.389 -0.252  
c 5.035 0.855 0.137  
c 5.740 -0.296 0.278  
c 5.105 -1.551 0.117  
c 3.735 -1.550 -0.138  
c -5.725 1.170 -0.106  
c 3.037 2.079 -0.614

1. 19

h -6.779 0.915 -0.148  
h -5.544 1.739 0.807  
h -5.481 1.790 -0.971  
h -6.694 -1.142 -0.436  
h -5.257 -1.875 -1.154  
h -5.524 -1.965 0.602  
h -3.309 -2.186 -0.032  
h -0.895 -2.102 0.264  
h 1.068 0.564 1.419  
h 1.137 -0.929 -1.250  
h 5.484 1.830 0.239  
h 3.204 -2.489 -0.228  
h 5.659 -2.471 0.192  
h 6.792 -0.236 0.511  
h -3.438 2.141 0.151  
h -1.023 2.179 0.401  
h 3.754 2.894 -0.537  
h 2.726 1.991 -1.659  
h 2.164 2.328 -0.011

7. 2

n -4.931 -0.063 -0.112  
n 3.672 0.851 -0.155
